# Supplementary material for: On-treatment biomarkers can improve prediction of response to neoadjuvant chemotherapy in breast cancer
Source: Breast Cancer Res. 2019 Jun 14;21:73. doi: 10.1186/s13058-019-1159-3 (PMC6570893; doi:10.1186/s13058-019-1159-3)
Supplement: Supplementary file 4 — Table S1. Gene lists of pairwise analysis of pre- and on-treatment sequential patient-matched samples from NEO and I-SPY datasets using Significance analysis of microarrays with FDR = 10%. Table S2. Gene lists distinguishing between responders and non-responders at different time points across the NEO and ISPY datasets using rank product analysis with p < 0.05, p < 0.01, and p < 0.001. Pre-treatment (TP), 2 weeks (T2), mid-chemo (TM), and surgery (TS). Table S3. Gene lists distinguishing between responders and non-responders at different time points across the NEO and I-SPY datasets using significance analysis of microarrays with FDR = 10%, FDR = 5%, and FDR = 1%. Pre-treatment (TP), 2 weeks (T2), mid-chemo (TM), and surgery (TS). (XLSX 1184 kb) [file 13058_2019_1159_MOESM4_ESM.xlsx]

## Sheet: Supplementary Table 1
Pairwise fold change FDR 10% pre-on treatment in NEO and I-SPY
Gene Name	Dataset	Fold Change	q-value	FDR=10%	FDR=5%	FDR=1%
SELL	I-SPY	-1.7366	0	1	0	0
LSP1	I-SPY	-1.28599	0	1	1	0
FMO1	I-SPY	-1.2707	0	1	0	0
FPR3	I-SPY	-1.8755	0	1	0	0
HLA-DOA	I-SPY	-1.10114	0	1	0	0
TGFB3	I-SPY	-1.02703	0	1	1	0
TRIM25	I-SPY	-1.81734	0	1	0	0
THAP11	I-SPY	-1.92126	0	1	0	0
S100A11	I-SPY	-2.11476	0	1	0	0
PRRC2C	I-SPY	-3.00615	0	1	0	0
TUBA4A	I-SPY	-1.98844	0	1	0	0
APOBEC3G	I-SPY	-1.29995	0	1	0	0
PPEF1	I-SPY	-2.12473	0	1	1	0
TRIM69	I-SPY	-1.1069	0	1	1	0
RNASE1	I-SPY	-3.19801	0	1	0	0
EIF4A1	I-SPY	-1.38721	0	1	0	0
SETD7	I-SPY	-1.78598	0	1	0	0
MS4A6A	I-SPY	-1.44388	0	1	0	0
FAIM3	I-SPY	-2.27109	0	1	0	0
XBP1	I-SPY	-1.49417	0	1	0	0
JMJD7-PLA2G4B	I-SPY	-2.18028	0	1	0	0
MINK1	I-SPY	-1.81294	0	1	0	0
PAFAH1B2	I-SPY	-1.74209	0	1	1	1
ESRP2	I-SPY	-2.19036	0	1	1	0
SLC9A3R1	I-SPY	-1.94461	0	1	1	0
CGGBP1	I-SPY	-1.8257	0	1	1	0
WAPAL	I-SPY	-2.04195	0	1	1	1
Septin 5	I-SPY	-2.02505	0	1	0	0
RFFL	I-SPY	-1.12313	0	1	1	0
VCAN	I-SPY	-1.24178	0	1	0	0
DHX58	I-SPY	-1.27506	0	1	1	0
RABL5	I-SPY	-1.47936	0	1	0	0
WDR74	I-SPY	-1.78992	0	1	0	0
MARCKSL1	I-SPY	-1.96263	0	1	1	0
PDS5A	I-SPY	-1.60906	0	1	1	0
TOP3B	I-SPY	-2.56908	0	1	0	0
TRIT1	I-SPY	-1.86078	0	1	1	0
PELO	I-SPY	-0.794605	0	1	1	0
PDZD11	I-SPY	-2.43765	0	1	0	0
ABT1	I-SPY	-1.90039	0	1	1	0
GSTO2	I-SPY	-1.59175	0	1	0	0
PCNXL2	I-SPY	-1.45979	0	1	1	1
PA2G4	I-SPY	-1.85045	0	1	1	0
MYL4	I-SPY	-2.47101	0	1	1	0
TRUB2	I-SPY	-3.01044	0	1	1	0
TRIM32	I-SPY	-1.17939	0	1	1	0
GIMAP4	I-SPY	-1.74715	0	1	0	0
RPP21	I-SPY	-3.38439	0	1	1	0
SAMD9L	I-SPY	-1.36526	0	1	0	0
SRPX2	I-SPY	-3.20337	0	1	1	0
RAB8A	I-SPY	-1.61515	0	1	0	0
SMARCD2	I-SPY	-2.22912	0	1	1	0
NUP210	I-SPY	-3.57952	0	1	1	0
SUOX	I-SPY	-1.33413	0	1	0	0
NQO2	I-SPY	-1.64182	0	1	0	0
TXNDC15	I-SPY	-2.67423	0	1	0	0
CHD4	I-SPY	-1.87214	0	1	0	0
ZNF302	I-SPY	-1.62303	0	1	1	0
PFKP	I-SPY	-1.83414	0	1	1	0
NME1	I-SPY	-2.60955	0	1	1	0
HTRA3	I-SPY	-1.67065	0	1	0	0
PSMG2	I-SPY	-1.51183	0	1	0	0
C19orf66	I-SPY	-2.38183	0	1	1	1
TSC22D1	I-SPY	-0.993678	0	1	1	0
MMP9	I-SPY	-1.17191	0	1	1	0
RABGAP1L	I-SPY	-2.17189	0	1	0	0
DTX3L	I-SPY	-1.564	0	1	0	0
TTC39A	I-SPY	-1.8139	0	1	0	0
JUP	I-SPY	-2.6124	0	1	0	0
LOC148145	I-SPY	-4.19764	0	1	1	1
LAPTM5	I-SPY	-2.2815	0	1	0	0
DPP3	I-SPY	-2.68378	0	1	1	0
MICAL2	I-SPY	-1.37	0	1	0	0
CD79A	I-SPY	-2.29888	0	1	0	0
RHOH	I-SPY	-2.10938	0	1	1	0
MARCKS	I-SPY	-0.910861	0	1	1	0
STAT1	I-SPY	-1.17056	0	1	0	0
EVPL	I-SPY	-2.617	0	1	1	0
TLR7	I-SPY	-1.87254	0	1	0	0
DDX23	I-SPY	-1.92377	0	1	1	0
NAP1L1	I-SPY	-1.13679	0	1	0	0
CD4	I-SPY	-1.67885	0	1	0	0
LRRC32	I-SPY	-0.943215	0	1	1	1
MAZ	I-SPY	-2.96201	0	1	0	0
FLOT1	I-SPY	-2.87324	0	1	0	0
HLA-DPB1	I-SPY	-1.31081	0	1	0	0
DNAJA2	I-SPY	-1.88944	0	1	1	0
LOC100506840	I-SPY	-2.18246	0	1	0	0
TBC1D10B	I-SPY	-2.37928	0	1	0	0
OXA1L	I-SPY	-4.06496	0	1	1	1
RHOG	I-SPY	-2.17562	0	1	0	0
IL2RG	I-SPY	-1.73897	0	1	0	0
FAM134A	I-SPY	-1.63211	0	1	0	0
STK24	I-SPY	-1.47767	0	1	0	0
CUL5	I-SPY	-1.55632	0	1	0	0
ZBED2	I-SPY	-1.30185	0	1	0	0
NDUFB5	I-SPY	-1.06612	0	1	0	0
SH3RF2	I-SPY	-2.38563	0	1	0	0
CTSC	I-SPY	-1.53816	0	1	1	0
OSTF1	I-SPY	-1.38286	0	1	0	0
HNRNPA2B1	I-SPY	-1.30654	0	1	0	0
LCP1	I-SPY	-2.28378	0	1	1	0
OAS3	I-SPY	-1.72445	0	1	0	0
SFXN2	I-SPY	-2.00325	0	1	0	0
SYNE1	I-SPY	-1.57265	0	1	1	0
C11orf61	I-SPY	-1.39612	0	1	1	1
psiTPTE22	I-SPY	-2.08791	0	1	1	0
C9orf11	I-SPY	-1.67048	0	1	1	0
DHX38	I-SPY	-2.20461	0	1	0	0
WASL	I-SPY	-2.18461	0	1	1	0
TWF1	I-SPY	-1.97207	0	1	1	0
PMVK	I-SPY	-2.14488	0	1	1	0
SMA4	I-SPY	-2.52507	0	1	1	0
GNA12	I-SPY	-1.18893	0	1	1	0
C5orf15	I-SPY	-1.09087	0	1	0	0
KREMEN1	I-SPY	-1.77833	0	1	1	0
SMC6	I-SPY	-2.08242	0	1	0	0
WASF2	I-SPY	-3.29418	0	1	1	0
YTHDF2	I-SPY	-1.1107	0	1	0	0
CTHRC1	I-SPY	-1.7744	0	1	0	0
FGFR4	I-SPY	-1.66722	0	1	0	0
GNG5	I-SPY	-1.15382	0	1	1	0
IRF1	I-SPY	-1.97728	0	1	0	0
ZC3HAV1	I-SPY	-2.81464	0	1	0	0
PACS1	I-SPY	-1.54541	0	1	1	0
AIF1	I-SPY	-1.48479	0	1	0	0
ADAMTSL5	I-SPY	-3.51781	0	1	1	1
RBM15B	I-SPY	-1.15265	0	1	0	0
GIMAP6	I-SPY	-1.73734	0	1	1	0
TUBB	I-SPY	-1.62121	0	1	0	0
PTAFR	I-SPY	-1.98993	0	1	0	0
F2RL2	I-SPY	-1.44148	0	1	0	0
FAM189B	I-SPY	-2.22153	0	1	0	0
LRP3	I-SPY	-1.65075	0	1	1	0
CLCN3	I-SPY	-0.858625	0	1	0	0
FAM134C	I-SPY	-2.81255	0	1	0	0
PIP5K1C	I-SPY	-1.95744	0	1	0	0
ZNF528	I-SPY	-1.64951	0	1	0	0
EEFSEC	I-SPY	-2.38015	0	1	1	0
GATC	I-SPY	-2.2439	0	1	0	0
PTPN7	I-SPY	-1.10948	0	1	1	0
CABIN1	I-SPY	-1.54237	0	1	0	0
GRM3	I-SPY	-2.10125	0	1	1	0
DCBLD1	I-SPY	-1.10227	0	1	1	1
C9orf78	I-SPY	-2.10039	0	1	0	0
MUTED	I-SPY	-2.00169	0	1	0	0
TREM2	I-SPY	-2.62681	0	1	1	0
VPS41	I-SPY	-2.34057	0	1	0	0
NR6A1	I-SPY	-0.912084	0	1	1	0
PPP1R10	I-SPY	-2.10639	0	1	0	0
TNPO1	I-SPY	-2.32579	0	1	0	0
HMGN4	I-SPY	-0.868908	0	1	1	0
AEBP1	I-SPY	-1.39508	0	1	1	1
RAC2	I-SPY	-2.44601	0	1	1	0
HOXC10	I-SPY	-2.99577	0	1	1	1
ABCF1	I-SPY	-2.31803	0	1	1	0
TRPS1	I-SPY	-1.58812	0	1	1	0
KIAA0562	I-SPY	-2.52531	0	1	0	0
RIPK1	I-SPY	-1.29333	0	1	0	0
SLC2A9	I-SPY	-2.16762	0	1	1	1
PCCA	I-SPY	-1.46802	0	1	0	0
H2AFX	I-SPY	-2.1196	0	1	1	0
SEC24C	I-SPY	-2.27909	0	1	0	0
PSMB9	I-SPY	-1.69853	0	1	1	0
CCL19	I-SPY	-1.45441	0	1	1	0
MYO1C	I-SPY	-4.30986	0	1	0	0
Septin 4	I-SPY	-1.70564	0	1	0	0
NFKBIE	I-SPY	-2.20483	0	1	0	0
PPP2CA	I-SPY	-1.41606	0	1	0	0
C8orf68	I-SPY	-1.4296	0	1	1	0
MTIF3	I-SPY	-1.48365	0	1	1	0
KRT19	I-SPY	-1.82904	0	1	0	0
CXCL14	I-SPY	-1.32699	0	1	0	0
CD27	I-SPY	-2.0504	0	1	0	0
MUM1	I-SPY	-2.90096	0	1	1	1
BPTF	I-SPY	-3.58535	0	1	1	0
BRD1	I-SPY	-2.03408	0	1	0	0
TRIM28	I-SPY	-5.24339	0	1	1	0
C3AR1	I-SPY	-1.45985	0	1	0	0
VOPP1	I-SPY	-1.69404	0	1	0	0
LPXN	I-SPY	-1.36618	0	1	1	0
TMEM119	I-SPY	-1.60577	0	1	0	0
TMEM106C	I-SPY	-2.34926	0	1	1	0
C19orf22	I-SPY	-3.03877	0	1	1	0
SKAP1	I-SPY	-1.39783	0	1	1	0
PITHD1	I-SPY	-0.930853	0	1	1	1
RUNX1	I-SPY	-1.44639	0	1	1	0
EGR3	I-SPY	-1.38247	0	1	1	1
TMEM54	I-SPY	-2.92518	0	1	1	0
WIPF1	I-SPY	-1.13663	0	1	0	0
SNX6	I-SPY	-1.11615	0	1	1	0
DAP	I-SPY	-1.48344	0	1	0	0
COL4A2	I-SPY	-3.04933	0	1	0	0
ADAM19	I-SPY	-1.67518	0	1	0	0
KCTD5	I-SPY	-1.59977	0	1	0	0
C1orf187	I-SPY	-1.71734	0	1	0	0
CD99	I-SPY	-1.64027	0	1	1	0
PAG1	I-SPY	-1.63808	0	1	0	0
UACA	I-SPY	-0.955666	0	1	0	0
MYST2	I-SPY	-1.52223	0	1	0	0
ARHGAP29	I-SPY	-1.57184	0	1	0	0
PPP1R13L	I-SPY	-4.63089	0	1	1	0
STAC	I-SPY	-2.02217	0	1	0	0
CNIH	I-SPY	-1.5162	0	1	1	0
CYBA	I-SPY	-2.0608	0	1	0	0
ANXA6	I-SPY	-1.49619	0	1	1	0
GBP2	I-SPY	-1.43362	0	1	0	0
DOCK10	I-SPY	-2.0076	0	1	0	0
RAB24	I-SPY	-2.20216	0	1	0	0
HLA-DQA1	I-SPY	-1.16232	0	1	0	0
CAPZB	I-SPY	-1.95998	0	1	0	0
ZNF777	I-SPY	-1.68	0	1	0	0
ZNF536	I-SPY	-1.65575	0	1	1	1
RNF123	I-SPY	-1.50772	0	1	0	0
NAPSA	I-SPY	-2.70045	0	1	1	0
STIP1	I-SPY	-2.27371	0	1	0	0
HOXB4	I-SPY	-1.30497	0	1	1	0
HSPA1L	I-SPY	-1.59023	0	1	0	0
RHOA	I-SPY	-1.06704	0	1	0	0
NAV1	I-SPY	-2.10398	0	1	0	0
WARS	I-SPY	-1.51024	0	1	1	0
UBD	I-SPY	-1.77718	0	1	1	0
TRIM59	I-SPY	-1.38972	0	1	1	1
FLJ16423	I-SPY	-1.74857	0	1	0	0
GTPBP1	I-SPY	-1.77221	0	1	0	0
ZWINT	I-SPY	-1.66165	0	1	1	1
GZMK	I-SPY	-1.34788	0	1	1	0
DPAGT1	I-SPY	-3.27115	0	1	1	0
ADAMTS12	I-SPY	-1.75006	0	1	0	0
FYB	I-SPY	-1.60627	0	1	0	0
PRDM10	I-SPY	-2.75519	0	1	0	0
ZNF93	I-SPY	-3.06163	0	1	0	0
ZNF500	I-SPY	-2.50678	0	1	0	0
C16orf55	I-SPY	-1.35713	0	1	1	0
SUPT4H1	I-SPY	-1.8938	0	1	0	0
PPP1CA	I-SPY	-2.53838	0	1	0	0
UBXN4	I-SPY	-1.71581	0	1	1	0
TBC1D16	I-SPY	-3.24114	0	1	0	0
TXNL1	I-SPY	-1.61316	0	1	0	0
HLA-F	I-SPY	-1.19218	0	1	1	0
CAPNS1	I-SPY	-2.10852	0	1	0	0
ADAM10	I-SPY	-1.96719	0	1	1	0
SNRPC	I-SPY	-2.46174	0	1	0	0
DCP2	I-SPY	-1.90197	0	1	0	0
VDR	I-SPY	-1.90128	0	1	0	0
IFIT1	I-SPY	-1.36496	0	1	0	0
TBCC	I-SPY	-2.87108	0	1	1	0
WNT2	I-SPY	-1.34835	0	1	0	0
IBSP	I-SPY	-1.94532	0	1	0	0
CD2	I-SPY	-1.71687	0	1	0	0
HOPX	I-SPY	-1.81229	0	1	0	0
NRXN3	I-SPY	-1.71984	0	1	0	0
ENTPD1	I-SPY	-1.45767	0	1	0	0
RNF213	I-SPY	-2.97368	0	1	0	0
RNH1	I-SPY	-3.4766	0	1	1	0
CNOT7	I-SPY	-1.99928	0	1	1	0
ARHGDIA	I-SPY	-2.52201	0	1	0	0
TNFSF13B	I-SPY	-1.54634	0	1	0	0
IRF7	I-SPY	-1.23747	0	1	0	0
IRF5	I-SPY	-1.93715	0	1	0	0
CT62	I-SPY	-0.969311	0	1	1	1
LOC100499466	I-SPY	-3.26757	0	1	0	0
PIGO	I-SPY	-1.91287	0	1	1	0
CCDC146	I-SPY	-1.87876	0	1	1	0
SREBF2	I-SPY	-1.89892	0	1	0	0
KCTD4	I-SPY	-2.08411	0	1	0	0
SLFNL1	I-SPY	-1.54134	0	1	0	0
TPP1	I-SPY	-1.58004	0	1	0	0
NDUFS8	I-SPY	-3.30467	0	1	1	0
SMG5	I-SPY	-2.92952	0	1	0	0
BST2	I-SPY	-2.1945	0	1	0	0
GM2A	I-SPY	-1.71952	0	1	1	0
VWF	I-SPY	-1.74872	0	1	1	1
EFR3A	I-SPY	-1.16804	0	1	1	0
POSTN	I-SPY	-1.25264	0	1	0	0
DRAP1	I-SPY	-2.29757	0	1	0	0
YY1	I-SPY	-1.89648	0	1	0	0
MYO5A	I-SPY	-1.85791	0	1	1	0
MEPCE	I-SPY	-3.40544	0	1	1	0
PSME2	I-SPY	-2.23512	0	1	0	0
GNPAT	I-SPY	-1.49035	0	1	0	0
GUK1	I-SPY	-2.01831	0	1	0	0
IFT27	I-SPY	-1.49306	0	1	0	0
PGRMC1	I-SPY	-2.52151	0	1	1	0
SDAD1	I-SPY	-2.69474	0	1	0	0
ETV6	I-SPY	-2.51641	0	1	1	0
FUNDC2	I-SPY	-2.63917	0	1	0	0
PCMTD2	I-SPY	-2.25366	0	1	0	0
DAD1	I-SPY	-1.541	0	1	0	0
IQGAP1	I-SPY	-1.34884	0	1	1	0
GPX4	I-SPY	-2.2967	0	1	1	0
CSNK1A1	I-SPY	-0.659918	0	1	1	0
THY1	I-SPY	-2.1231	0	1	0	0
ZNF28	I-SPY	-1.9347	0	1	0	0
CREB3L4	I-SPY	-2.05453	0	1	1	0
TP53INP2	I-SPY	-1.58613	0	1	0	0
ACTR6	I-SPY	-1.6575	0	1	0	0
PRR5	I-SPY	-2.13492	0	1	0	0
P2RX5	I-SPY	-2.59682	0	1	0	0
DCK	I-SPY	-0.65326	0	1	1	1
VPS26B	I-SPY	-1.49654	0	1	0	0
TMEM132D	I-SPY	-1.98646	0	1	1	0
C19orf48	I-SPY	-2.82009	0	1	1	1
TAS2R20	I-SPY	-2.50935	0	1	0	0
TOP1	I-SPY	-1.60111	0	1	0	0
MLL	I-SPY	-1.14614	0	1	1	0
PIP4K2A	I-SPY	-1.54796	0	1	1	1
TYK2	I-SPY	-2.69559	0	1	0	0
HCLS1	I-SPY	-2.44117	0	1	0	0
CXCL9	I-SPY	-1.48639	0	1	0	0
ZNF814	I-SPY	-2.72257	0	1	1	0
BSDC1	I-SPY	-2.39465	0	1	0	0
MLEC	I-SPY	-2.29596	0	1	0	0
MAX	I-SPY	-2.66356	0	1	0	0
H1FNT	I-SPY	-1.62965	0	1	1	0
FAM21C	I-SPY	-2.50431	0	1	1	0
CLPTM1L	I-SPY	-4.93476	0	1	1	0
ZDHHC8	I-SPY	-1.39237	0	1	1	0
PARP15	I-SPY	-3.35162	0	1	0	0
LRRC57	I-SPY	-1.66296	0	1	0	0
ACVRL1	I-SPY	-2.04121	0	1	0	0
PLA2G15	I-SPY	-1.82178	0	1	1	0
ENHO	I-SPY	-2.31324	0	1	1	0
ZBTB45	I-SPY	-2.86835	0	1	1	0
BANF1	I-SPY	-4.38032	0	1	1	0
RHOT2	I-SPY	-2.54156	0	1	1	0
ALOX5	I-SPY	-1.27555	0	1	1	0
MAGEA10	I-SPY	-0.996548	0	1	1	0
PDS5B	I-SPY	-1.71405	0	1	0	0
TAP1	I-SPY	-1.69668	0	1	1	1
ZNF333	I-SPY	-3.79305	0	1	0	0
SPEG	I-SPY	-3.02332	0	1	1	0
EIF4B	I-SPY	-2.88738	0	1	1	0
DOCK6	I-SPY	-2.23771	0	1	0	0
PLEC	I-SPY	-3.74957	0	1	1	0
VWA1	I-SPY	-2.82776	0	1	1	0
TUBB2A	I-SPY	-1.62279	0	1	0	0
TCF12	I-SPY	-0.822549	0	1	1	0
AMN	I-SPY	-2.46479	0	1	1	0
FBXO6	I-SPY	-3.66341	0	1	1	0
KLKB1	I-SPY	-1.71738	0	1	1	0
CTCF	I-SPY	-0.857131	0	1	0	0
GNA13	I-SPY	-1.12315	0	1	0	0
TRANK1	I-SPY	-1.69493	0	1	0	0
BCR	I-SPY	-1.96262	0	1	1	0
CD86	I-SPY	-1.62781	0	1	1	0
CTSK	I-SPY	-1.53245	0	1	0	0
DCTN1	I-SPY	-2.01526	0	1	1	0
ARHGEF16	I-SPY	-1.9141	0	1	0	0
SLC38A10	I-SPY	-1.53062	0	1	1	0
QARS	I-SPY	-1.66975	0	1	1	0
TMEM25	I-SPY	-1.13637	0	1	1	0
STOML1	I-SPY	-2.66535	0	1	1	0
LTB	I-SPY	-1.73748	0	1	0	0
ESYT1	I-SPY	-2.72848	0	1	0	0
CFH	I-SPY	-1.18744	0	1	0	0
EP400	I-SPY	-1.85898	0	1	0	0
POLR2G	I-SPY	-1.51106	0	1	1	1
MYST3	I-SPY	-2.095	0	1	1	0
SLN	I-SPY	-1.26673	0	1	0	0
LOC285972	I-SPY	-1.76657	0	1	1	0
PPP2R2D	I-SPY	-4.28361	0	1	1	0
MOCS2	I-SPY	-2.1353	0	1	1	0
PSMB7	I-SPY	-1.47918	0	1	0	0
AKIP1	I-SPY	-2.23197	0	1	0	0
CKAP4	I-SPY	-1.80427	0	1	0	0
CTR9	I-SPY	-1.69231	0	1	0	0
SLC25A5	I-SPY	-1.79658	0	1	1	0
HSPA8	I-SPY	-1.88086	0	1	1	1
TCF3	I-SPY	-2.04495	0	1	0	0
VAC14	I-SPY	-1.65103	0	1	0	0
GGA1	I-SPY	-2.38628	0	1	1	0
CDK7	I-SPY	-1.26334	0	1	0	0
MMP11	I-SPY	-2.06655	0	1	0	0
TNF	I-SPY	-3.03096	0	1	1	0
PARP14	I-SPY	-2.03131	0	1	0	0
SEPN1	I-SPY	-2.86538	0	1	0	0
MAPRE1	I-SPY	-1.32383	0	1	0	0
SDHA	I-SPY	-2.24798	0	1	0	0
RRP8	I-SPY	-1.44196	0	1	0	0
C12orf43	I-SPY	-3.47126	0	1	1	0
ISX	I-SPY	-2.73971	0	1	0	0
PTPRE	I-SPY	-1.45536	0	1	0	0
RNF149	I-SPY	-1.47076	0	1	0	0
CYTH1	I-SPY	-1.98018	0	1	0	0
EZH2	I-SPY	-1.69393	0	1	1	0
YPEL2	I-SPY	-2.00163	0	1	0	0
RAB25	I-SPY	-2.29483	0	1	1	0
CASP7	I-SPY	-1.02758	0	1	1	0
CTDSP2	I-SPY	-1.7532	0	1	0	0
CXCL10	I-SPY	-1.44408	0	1	0	0
CDH11	I-SPY	-0.875106	0	1	1	0
PRDX2	I-SPY	-1.90578	0	1	0	0
PREX1	I-SPY	-1.51414	0	1	1	0
MYBL2	I-SPY	-3.1223	0	1	1	0
FBLN5	I-SPY	-1.78124	0	1	0	0
RNF10	I-SPY	-0.868553	0	1	1	0
ULK1	I-SPY	-2.4035	0	1	0	0
RAB11FIP1	I-SPY	-2.06378	0	1	1	0
RASSF2	I-SPY	-0.963786	0	1	0	0
LOC100129850	I-SPY	-1.60187	0	1	0	0
XRN2	I-SPY	-1.25921	0	1	1	0
L1CAM	I-SPY	-2.06453	0	1	0	0
SELPLG	I-SPY	-1.57682	0	1	0	0
VASH1	I-SPY	-1.95583	0	1	0	0
PTMS	I-SPY	-2.31995	0	1	1	0
ALS2CL	I-SPY	-1.4855	0	1	1	0
POLDIP2	I-SPY	-2.10171	0	1	1	0
SEMA3F	I-SPY	-2.72477	0	1	1	1
RASGRP3	I-SPY	-3.33722	0	1	0	0
TJP1	I-SPY	-2.27327	0	1	1	0
SERPING1	I-SPY	-1.81876	0	1	0	0
IGFBP7	I-SPY	-1.21628	0	1	0	0
PSMA5	I-SPY	-1.7307	0	1	0	0
IFI35	I-SPY	-1.57485	0	1	0	0
MYD88	I-SPY	-1.76317	0	1	0	0
SULF1	I-SPY	-1.52519	0	1	0	0
SIPA1	I-SPY	-1.48694	0	1	1	0
PSMB10	I-SPY	-1.9799	0	1	0	0
IL2RA	I-SPY	-1.52009	0	1	0	0
PTGES3	I-SPY	-1.19105	0	1	0	0
GOLT1B	I-SPY	-1.8389	0	1	1	0
MYO15A	I-SPY	-2.07425	0	1	0	0
CELSR2	I-SPY	-2.3601	0	1	1	0
COL15A1	I-SPY	-1.06145	0	1	0	0
STARD10	I-SPY	-2.04666	0	1	1	1
HLA-DPA1	I-SPY	-0.954645	0	1	1	0
F2R	I-SPY	-0.896169	0	1	0	0
AGTRAP	I-SPY	-2.29448	0	1	0	0
CD48	I-SPY	-1.04221	0	1	0	0
C20orf30	I-SPY	-0.966079	0	1	1	0
MGAT4A	I-SPY	-1.68189	0	1	1	0
HLA-DRA	I-SPY	-1.23294	0	1	0	0
CCR2	I-SPY	-1.20331	0	1	1	1
EPHB2	I-SPY	-1.47922	0	1	1	0
TREML1	I-SPY	-1.58347	0	1	1	0
LOC151174	I-SPY	-1.65315	0	1	0	0
AVL9	I-SPY	-1.94293	0	1	1	1
RAB11FIP4	I-SPY	-3.31415	0	1	0	0
CANX	I-SPY	-1.23859	0	1	1	0
NRM	I-SPY	-1.40661	0	1	0	0
FAP	I-SPY	-1.22268	0	1	0	0
KIAA0494	I-SPY	-0.84158	0	1	1	0
ATF4	I-SPY	-2.4911	0	1	0	0
HLA-DRB1	I-SPY	-1.81758	0	1	0	0
MRPS34	I-SPY	-2.32905	0	1	1	0
UBE2L6	I-SPY	-1.83858	0	1	0	0
IRF8	I-SPY	-1.40229	0	1	1	0
KDM6B	I-SPY	-2.59677	0	1	1	0
CLPP	I-SPY	-1.88009	0	1	0	0
RPN2	I-SPY	-2.63888	0	1	0	0
OAS2	I-SPY	-1.9229	0	1	0	0
LOC100507435	I-SPY	-1.81675	0	1	0	0
BCL10	I-SPY	-1.27989	0	1	1	0
HNRNPH1	I-SPY	-1.4079	0	1	0	0
SRA1	I-SPY	-1.05906	0	1	1	0
TAF12	I-SPY	-1.52399	0	1	0	0
UFC1	I-SPY	-3.44318	0	1	1	0
JOSD2	I-SPY	-2.77778	0	1	0	0
CSTF1	I-SPY	-1.79044	0	1	0	0
UCP2	I-SPY	-4.54272	0	1	0	0
HOXB7	I-SPY	-1.53363	0	1	1	0
RTN3	I-SPY	-2.03465	0	1	0	0
MS4A6E	I-SPY	-1.61	0	1	0	0
CLK3	I-SPY	-2.29491	0	1	0	0
ADAR	I-SPY	-2.15758	0	1	0	0
C5orf13	I-SPY	-0.925121	0	1	1	0
RRM1	I-SPY	-1.46311	0	1	0	0
ATP2A3	I-SPY	-2.06562	0	1	0	0
ME2	I-SPY	-2.22286	0	1	1	0
FGL2	I-SPY	-1.16107	0	1	0	0
KRAS	I-SPY	-3.82939	0	1	1	0
PTDSS1	I-SPY	-1.40017	0	1	1	0
DRG2	I-SPY	-1.91747	0	1	1	0
ZNF816	I-SPY	-1.11913	0	1	1	0
RBMX	I-SPY	-1.58875	0	1	0	0
FAM115A	I-SPY	-1.34845	0	1	1	0
MTL5	I-SPY	-1.65735	0	1	1	0
P4HB	I-SPY	-2.24548	0	1	0	0
ACTR3	I-SPY	-1.11891	0	1	0	0
ZDHHC16	I-SPY	-3.45506	0	1	1	0
NAPA	I-SPY	-2.62492	0	1	0	0
CDC42SE1	I-SPY	-3.65698	0	1	1	0
CD53	I-SPY	-1.71605	0	1	0	0
ARFGAP1	I-SPY	-3.82447	0	1	1	0
ATF5	I-SPY	-2.8586	0	1	1	0
DOCK8	I-SPY	-1.38661	0	1	0	0
OXCT2	I-SPY	-1.40365	0	1	1	0
CASP3	I-SPY	-1.26151	0	1	0	0
FTMT	I-SPY	-1.61654	0	1	1	0
M6PR	I-SPY	-1.9792	0	1	0	0
CD6	I-SPY	-2.07286	0	1	0	0
SEC16A	I-SPY	-2.03375	0	1	0	0
MPEG1	I-SPY	-1.24937	0	1	0	0
MTDH	I-SPY	-2.12366	0	1	1	0
SF3B1	I-SPY	-1.32939	0	1	1	0
GZMA	I-SPY	-1.62534	0	1	0	0
TDP2	I-SPY	-1.38852	0	1	0	0
PRIC285	I-SPY	-1.8774	0	1	1	1
IFI44L	I-SPY	-1.22338	0	1	0	0
ISLR	I-SPY	-1.58513	0	1	0	0
PTBP1	I-SPY	-1.82926	0	1	1	0
SPATA20	I-SPY	-2.50738	0	1	1	1
ERCC3	I-SPY	-2.03834	0	1	0	0
ISG20	I-SPY	-2.52453	0	1	1	0
PLXNC1	I-SPY	-0.853813	0	1	0	0
NADK	I-SPY	-2.13573	0	1	0	0
MPPED2	I-SPY	-0.808767	0	1	0	0
C11orf48	I-SPY	-3.0519	0	1	0	0
INPP5D	I-SPY	-1.70352	0	1	0	0
DNAJC13	I-SPY	-1.20656	0	1	1	0
HDGF	I-SPY	-2.04557	0	1	1	0
CEACAM19	I-SPY	-3.03839	0	1	1	0
DCAF7	I-SPY	-1.71807	0	1	0	0
TACSTD2	I-SPY	-1.50207	0	1	0	0
IRF2	I-SPY	-0.866147	0	1	0	0
SLC35B1	I-SPY	-1.81174	0	1	1	0
R3HDM1	I-SPY	-0.835752	0	1	0	0
HLA-DMB	I-SPY	-1.7391	0	1	0	0
CPSF1	I-SPY	-1.20924	0	1	1	0
RNF31	I-SPY	-1.99605	0	1	0	0
CACNB3	I-SPY	-3.14573	0	1	0	0
OXTR	I-SPY	-2.05407	0	1	1	0
IL2RB	I-SPY	-1.2507	0	1	0	0
NUP85	I-SPY	-3.25379	0	1	1	0
RAB31	I-SPY	-1.79103	0	1	1	0
HPS1	I-SPY	-1.63615	0	1	0	0
UBE2D2	I-SPY	-0.985988	0	1	0	0
SLC35A4	I-SPY	-3.19218	0	1	1	0
C3orf14	I-SPY	-1.68432	0	1	1	0
SYK	I-SPY	-2.81297	0	1	0	0
YIPF3	I-SPY	-1.81133	0	1	0	0
PPP1R15A	I-SPY	-1.64217	0	1	0	0
CAPZA1	I-SPY	-1.67471	0	1	0	0
HTT	I-SPY	-2.47027	0	1	0	0
FKBP4	I-SPY	-2.78947	0	1	0	0
EIF2B4	I-SPY	-2.12507	0	1	0	0
LTBP2	I-SPY	-1.69375	0	1	0	0
INSIG1	I-SPY	-2.37122	0	1	0	0
SSR2	I-SPY	-1.87845	0	1	1	1
CLTC	I-SPY	-1.43377	0	1	0	0
ZNRD1	I-SPY	-2.12095	0	1	1	1
UNC5B	I-SPY	-1.44831	0	1	0	0
PREB	I-SPY	-1.72797	0	1	1	0
ACTR1A	I-SPY	-2.0081	0	1	1	0
FDX1L	I-SPY	-2.2456	0	1	0	0
DKFZP586I1420	I-SPY	-2.52066	0	1	0	0
HCFC1R1	I-SPY	-1.60726	0	1	0	0
ISG15	I-SPY	-2.16013	0	1	1	0
RSAD2	I-SPY	-1.6995	0	1	1	0
VPS45	I-SPY	-2.69356	0	1	0	0
ACMSD	I-SPY	-1.9909	0	1	1	0
TCEB2	I-SPY	-2.56158	0	1	0	0
NPL	I-SPY	-1.46981	0	1	1	0
ERP29	I-SPY	-1.85876	0	1	1	0
LST1	I-SPY	-0.97901	0	1	1	0
PHKB	I-SPY	-1.832	0	1	1	0
UXS1	I-SPY	-1.79431	0	1	0	0
C15orf62	I-SPY	-2.02438	0	1	0	0
LGALS3BP	I-SPY	-3.5396	0	1	1	0
RPL10A	I-SPY	-2.10751	0	1	0	0
KIAA0101	I-SPY	-1.29669	0	1	1	0
HCP5	I-SPY	-1.71147	0	1	0	0
PHB	I-SPY	-2.44909	0	1	0	0
MOV10	I-SPY	-1.10272	0	1	1	0
GIGYF2	I-SPY	-2.68202	0	1	0	0
FAM46C	I-SPY	-1.38168	0	1	0	0
GLG1	I-SPY	-4.31467	0	1	0	0
ORAI1	I-SPY	-2.69006	0	1	0	0
ZDHHC6	I-SPY	-2.12752	0	1	0	0
SLC39A7	I-SPY	-1.52909	0	1	1	0
NAGA	I-SPY	-2.77747	0	1	0	0
MFAP5	I-SPY	-1.36867	0	1	1	0
TAGLN2	I-SPY	-1.9974	0	1	0	0
C20orf103	I-SPY	-1.13745	0	1	1	0
FCGR1A	I-SPY	-2.18294	0	1	1	0
FCGR3A	I-SPY	-1.86358	0	1	0	0
LPIN2	I-SPY	-1.54977	0	1	0	0
SEC22A	I-SPY	-1.82337	0	1	1	0
IL18BP	I-SPY	-1.20845	0	1	0	0
MECP2	I-SPY	-1.83118	0	1	0	0
IL22RA1	I-SPY	-2.05682	0	1	0	0
CYP19A1	I-SPY	-4.05002	0	1	0	0
PRELID1	I-SPY	-2.34166	0	1	0	0
TMX1	I-SPY	-0.984056	0	1	1	0
AGPAT3	I-SPY	-1.77353	0	1	0	0
SSR4	I-SPY	-2.89041	0	1	0	0
IL7R	I-SPY	-2.27568	0	1	0	0
RBBP4	I-SPY	-1.97505	0	1	1	0
CENPF	I-SPY	-1.02275	0	1	1	1
BRD2	I-SPY	-1.85553	0	1	0	0
TMEM11	I-SPY	-1.60013	0	1	0	0
HLA-G	I-SPY	-2.5081	0	1	1	0
C14orf21	I-SPY	-1.61467	0	1	1	0
MKRN2	I-SPY	-1.53624	0	1	1	0
YIPF5	I-SPY	-2.46547	0	1	0	0
TTL	I-SPY	-2.74276	0	1	1	0
SYF2	I-SPY	-1.19786	0	1	1	0
TYROBP	I-SPY	-1.20007	0	1	0	0
SLC30A5	I-SPY	-0.929488	0	1	1	0
HLA-A	I-SPY	-2.27782	0	1	0	0
CLPS	I-SPY	-1.91588	0	1	0	0
GNGT2	I-SPY	-1.23482	0	1	0	0
ZNFX1	I-SPY	-2.25933	0	1	0	0
ARHGAP30	I-SPY	-2.06933	0	1	0	0
MAP2K7	I-SPY	-1.85863	0	1	0	0
MFSD10	I-SPY	-1.77277	0	1	0	0
SERBP1	I-SPY	-1.75068	0	1	0	0
FURIN	I-SPY	-3.06371	0	1	0	0
CUEDC1	I-SPY	-1.06576	0	1	1	0
DGCR6L	I-SPY	-1.91027	0	1	0	0
KRT10	I-SPY	-1.35876	0	1	1	0
ACAA2	I-SPY	-1.60392	0	1	1	0
SLAMF8	I-SPY	-1.84128	0	1	0	0
DCTPP1	I-SPY	-1.77711	0	1	0	0
CCDC130	I-SPY	-1.89738	0	1	1	0
ANP32B	I-SPY	-3.21195	0	1	1	0
LOC100129034	I-SPY	-1.16571	0	1	1	0
FLRT1	I-SPY	-3.66009	0	1	1	0
PCLO	I-SPY	-1.54201	0	1	1	0
C1orf144	I-SPY	-2.23155	0	1	1	0
PLEK	I-SPY	-1.30828	0	1	0	0
EID2	I-SPY	-2.62559	0	1	1	0
DPP7	I-SPY	-1.4774	0	1	1	0
PSMA4	I-SPY	-2.15563	0	1	1	0
MIS18BP1	I-SPY	-1.87477	0	1	0	0
IGF1R	I-SPY	-1.75215	0	1	0	0
FCN2	I-SPY	-1.43289	0	1	1	0
GRSF1	I-SPY	-1.11872	0	1	0	0
ATN1	I-SPY	-1.30301	0	1	1	0
KPNB1	I-SPY	-1.74664	0	1	1	0
HLA-DQB1	I-SPY	-1.78165	0	1	0	0
GDI2	I-SPY	-1.95447	0	1	0	0
PARP9	I-SPY	-1.19725	0	1	0	0
CRB3	I-SPY	-2.17927	0	1	0	0
SLC4A2	I-SPY	-2.76716	0	1	0	0
PEBP1	I-SPY	-1.99645	0	1	1	0
PGLS	I-SPY	-1.26055	0	1	1	0
SPCS3	I-SPY	-1.80798	0	1	0	0
ACOT13	I-SPY	-2.22872	0	1	0	0
KIAA0889	I-SPY	-1.86775	0	1	0	0
LOC645431	I-SPY	-2.34435	0	1	1	1
ABHD2	I-SPY	-1.89721	0	1	0	0
ANKRD52	I-SPY	-2.22476	0	1	0	0
ELMOD1	I-SPY	-2.40378	0	1	1	0
GAA	I-SPY	-2.52219	0	1	0	0
COMMD5	I-SPY	-2.6746	0	1	1	0
TUBA3D	I-SPY	-1.63377	0	1	0	0
EIF5	I-SPY	-1.3066	0	1	0	0
TSPAN18	I-SPY	-1.41196	0	1	0	0
CFHR1	I-SPY	-1.06043	0	1	1	0
EID1	I-SPY	-1.35422	0	1	0	0
SH3BGRL3	I-SPY	-2.8345	0	1	1	0
RBPJ	I-SPY	-3.15008	0	1	1	0
TBL1XR1	I-SPY	-1.29099	0	1	0	0
C20orf4	I-SPY	-1.84327	0	1	1	1
P2RY13	I-SPY	-1.30167	0	1	0	0
H2AFZ	I-SPY	-1.53871	0	1	0	0
TCTN1	I-SPY	-1.15311	0	1	0	0
PLIN3	I-SPY	-2.52879	0	1	0	0
SELT	I-SPY	-4.56351	9.00869	1	1	0
CLCN2	I-SPY	-1.7776	9.00869	1	1	0
ADNP2	I-SPY	-1.952	9.00869	1	1	0
C6orf47	I-SPY	-1.66815	9.00869	1	1	0
PDZD3	I-SPY	-1.96094	9.00869	1	1	0
BMP2	I-SPY	-1.7348	9.00869	1	0	0
BBS9	I-SPY	-1.15914	9.00869	1	1	1
FOSB	I-SPY	-2.9321	9.00869	1	0	0
OGFRL1	I-SPY	-3.02019	9.00869	1	1	0
CCDC12	I-SPY	-4.74109	9.00869	1	1	0
WDR91	I-SPY	-2.30442	9.00869	1	1	0
PAX2	I-SPY	-1.73699	9.00869	1	1	0
DNAJB8	I-SPY	-8.40557	9.00869	1	1	0
APLP1	I-SPY	-2.58377	9.00869	1	1	0
EZH1	I-SPY	-1.25139	9.00869	1	1	1
CPEB4	I-SPY	-4.15777	9.00869	1	1	0
ATP2B1	I-SPY	-1.80755	9.00869	1	1	1
KCNAB1	I-SPY	-3.48688	9.00869	1	1	0
KCNC1	I-SPY	-1.40936	9.00869	1	1	0
MYC	I-SPY	-2.94183	9.00869	1	0	0
MTX2	I-SPY	-5.64164	9.00869	1	1	0
TMEM38B	I-SPY	-2.15419	9.00869	1	1	1
EPN2	I-SPY	-1.62174	9.00869	1	1	0
MBL2	I-SPY	-1.79867	9.00869	1	0	0
LRRC7	I-SPY	-2.87697	9.00869	1	0	0
LOC286467	I-SPY	-1.79631	9.00869	1	0	0
C5orf42	I-SPY	-1.34266	9.00869	1	0	0
LOC284648	I-SPY	-3.39961	9.00869	1	0	0
PRPF38A	I-SPY	-3.66901	9.00869	1	1	1
ATG2B	I-SPY	-4.01659	9.00869	1	1	0
CREM	I-SPY	-3.19001	9.00869	1	0	0
TMX4	I-SPY	-4.8152	9.00869	1	1	1
MAOB	I-SPY	-1.94804	9.00869	1	1	0
KLHL31	I-SPY	-1.20396	9.00869	1	1	0
YRDC	I-SPY	-2.02417	9.00869	1	1	1
OSBPL10	I-SPY	-4.47845	9.00869	1	0	0
SLC2A13	I-SPY	-4.30515	9.00869	1	1	0
PLEKHA3	I-SPY	-2.09311	9.00869	1	1	0
ARPC5L	I-SPY	-2.91483	9.00869	1	0	0
ADCYAP1	I-SPY	-2.74393	9.00869	1	1	0
C11orf96	I-SPY	-4.8866	9.00869	1	1	0
C7orf30	I-SPY	-2.86484	9.00869	1	1	0
RFK	I-SPY	-3.70295	9.00869	1	1	1
RGS16	I-SPY	-5.23267	9.00869	1	1	0
ADAMTS6	I-SPY	-2.99092	9.00869	1	0	0
UBE2D1	I-SPY	-1.98012	9.00869	1	0	0
CHCHD6	I-SPY	-1.84799	9.00869	1	0	0
PRMT3	I-SPY	-1.64827	9.00869	1	1	0
NCAM1	I-SPY	-1.8332	9.00869	1	0	0
SNX10	I-SPY	-1.53878	9.00869	1	1	0
THAP1	I-SPY	-2.01818	9.00869	1	0	0
B4GALT5	I-SPY	-1.70247	9.00869	1	0	0
CCDC70	I-SPY	-3.25927	9.00869	1	1	0
TSLP	I-SPY	-2.74252	9.00869	1	0	0
COL4A6	I-SPY	-1.94038	9.00869	1	0	0
CBWD5	I-SPY	-3.35273	9.00869	1	1	1
C14orf126	I-SPY	-5.85259	9.00869	1	1	1
PRPF4	I-SPY	-1.95444	9.00869	1	0	0
ZDHHC23	I-SPY	-1.62302	9.00869	1	1	1
SEZ6	I-SPY	-3.30128	9.00869	1	0	0
ATPIF1	I-SPY	-2.60285	9.00869	1	1	0
SHF	I-SPY	-1.83069	9.00869	1	0	0
STXBP1	I-SPY	-2.46403	9.00869	1	0	0
LOC100505633	I-SPY	-2.10456	9.00869	1	0	0
CHMP2B	I-SPY	-4.30382	9.00869	1	1	0
MOBKL3	I-SPY	-3.61214	9.00869	1	1	0
WDR33	I-SPY	-4.04069	9.00869	1	1	1
RGS6	I-SPY	-1.79548	9.00869	1	0	0
ZNF300	I-SPY	-3.16166	9.00869	1	0	0
RWDD1	I-SPY	-2.2543	9.00869	1	0	0
GADD45GIP1	I-SPY	-1.70829	9.00869	1	1	0
CRLF1	I-SPY	-0.797796	9.00869	1	1	0
CUL1	I-SPY	-2.94229	9.00869	1	0	0
L3MBTL1	I-SPY	-1.56803	9.00869	1	0	0
PDE4A	I-SPY	-2.6321	9.00869	1	0	0
ZFP37	I-SPY	-2.33721	9.00869	1	1	0
ROCK2	I-SPY	-2.99361	9.00869	1	1	1
FAAH2	I-SPY	-1.71932	9.00869	1	1	0
SNHG6	I-SPY	-1.66297	9.00869	1	1	0
HEATR8	I-SPY	-1.8856	9.00869	1	0	0
ARRDC3	I-SPY	-2.76152	9.00869	1	0	0
REM1	I-SPY	-3.45774	9.00869	1	1	0
CEBPB	I-SPY	-1.64401	9.00869	1	0	0
PWRN2	I-SPY	-3.67422	9.00869	1	1	0
ISL2	I-SPY	-2.18281	9.00869	1	1	0
THSD1P1	I-SPY	-1.81927	9.00869	1	0	0
MTTP	I-SPY	-1.12046	9.00869	1	1	0
HUNK	I-SPY	-2.32098	9.00869	1	1	0
BRMS1	I-SPY	-2.11314	9.00869	1	0	0
FAM124A	I-SPY	-1.73104	9.00869	1	1	0
SDPR	I-SPY	-3.1582	9.00869	1	0	0
SNX1	I-SPY	-3.09548	9.00869	1	1	0
KCNS1	I-SPY	-2.28133	9.00869	1	1	0
NPTX2	I-SPY	-1.78682	9.00869	1	1	0
TARS2	I-SPY	-1.80756	9.00869	1	1	0
SLC7A14	I-SPY	-1.57112	9.00869	1	0	0
NCRNA00186	I-SPY	-3.98896	9.00869	1	1	0
SNCB	I-SPY	-1.67581	9.00869	1	1	1
CYR61	I-SPY	-3.09992	9.00869	1	0	0
SREBF1	I-SPY	-1.48511	9.00869	1	0	0
CGA	I-SPY	-1.44638	9.00869	1	0	0
WRAP53	I-SPY	-1.01384	9.00869	1	1	0
LOC256021	I-SPY	-3.68798	9.00869	1	0	0
CA5BP1	I-SPY	-2.87883	9.00869	1	1	0
SOCS3	I-SPY	-2.83245	9.00869	1	0	0
VIP	I-SPY	-2.48608	9.00869	1	0	0
MRO	I-SPY	-1.47108	9.00869	1	1	0
MED27	I-SPY	-1.65993	9.00869	1	0	0
GATA6	I-SPY	-2.54556	9.00869	1	0	0
HAO1	I-SPY	-2.22324	9.00869	1	0	0
MGAT4B	I-SPY	-0.594373	9.00869	1	1	0
USP39	I-SPY	-2.9445	9.00869	1	0	0
USP48	I-SPY	-2.18095	9.00869	1	0	0
LOC282997	I-SPY	-1.99492	9.00869	1	0	0
NGDN	I-SPY	-2.55531	9.00869	1	0	0
FKBPL	I-SPY	-1.58615	9.00869	1	1	1
KIAA1704	I-SPY	-5.07296	9.00869	1	1	0
CDK20	I-SPY	-4.05548	9.00869	1	1	0
NEFL	I-SPY	-2.38819	9.00869	1	1	0
PCDHB14	I-SPY	-2.5756	9.00869	1	1	0
PSPH	I-SPY	-1.97313	9.00869	1	0	0
PTGS2	I-SPY	-2.67359	9.00869	1	0	0
TRRAP	I-SPY	-1.51491	9.00869	1	1	1
GLIPR1L1	I-SPY	-1.65771	9.00869	1	0	0
LOC728743	I-SPY	-1.94826	9.00869	1	1	0
RABL2B	I-SPY	-1.21907	9.00869	1	0	0
ACADL	I-SPY	-1.66525	9.00869	1	1	1
CREBZF	I-SPY	-3.3462	9.00869	1	0	0
JAM2	I-SPY	-1.79258	9.00869	1	1	0
PEX26	I-SPY	-2.01695	9.00869	1	1	1
FLJ42418	I-SPY	-2.17512	9.00869	1	1	0
PLLP	I-SPY	-1.58691	9.00869	1	0	0
CTAG1A	I-SPY	-1.9867	9.00869	1	0	0
RYR3	I-SPY	-2.08493	9.00869	1	0	0
SMAD9	I-SPY	-6.87526	9.00869	1	1	0
ZNF521	I-SPY	-2.21106	9.00869	1	0	0
YPEL5	I-SPY	-2.22723	9.00869	1	0	0
AKR1C1	I-SPY	-1.70232	9.00869	1	1	0
DDX59	I-SPY	-8.03817	9.00869	1	1	0
LOC440149	I-SPY	-1.54591	9.00869	1	1	0
PORCN	I-SPY	-1.20216	9.00869	1	1	0
SSX2IP	I-SPY	-4.51308	9.00869	1	1	0
GLTSCR2	I-SPY	-12.7374	9.00869	1	1	0
ORC4	I-SPY	-5.32703	9.00869	1	1	0
USP47	I-SPY	-6.05756	9.00869	1	1	0
PDE4B	I-SPY	-2.98209	9.00869	1	1	0
C14orf181	I-SPY	-1.2806	9.00869	1	1	0
MYLK4	I-SPY	-3.20162	9.00869	1	0	0
TSPO2	I-SPY	-1.62516	9.00869	1	1	1
CSF3	I-SPY	-2.66974	9.00869	1	1	0
TROAP	I-SPY	-1.56277	9.00869	1	1	0
NGFRAP1	I-SPY	-1.70109	9.00869	1	1	0
ZNF146	I-SPY	-2.21941	9.00869	1	1	0
AMOTL1	I-SPY	-3.63247	9.00869	1	1	1
EFHA2	I-SPY	-2.43673	9.00869	1	1	0
THNSL2	I-SPY	-2.54258	9.00869	1	0	0
AFP	I-SPY	-1.1089	9.00869	1	1	0
FNTA	I-SPY	-1.87462	9.00869	1	0	0
RIPK4	I-SPY	-2.14219	9.00869	1	0	0
FAM162A	I-SPY	-1.53812	9.00869	1	0	0
ARHGAP19	I-SPY	-6.18732	9.00869	1	1	0
GIN1	I-SPY	-2.66256	9.00869	1	1	1
PIM3	I-SPY	-1.67786	9.00869	1	0	0
ANGEL1	I-SPY	-1.6236	9.00869	1	0	0
DEXI	I-SPY	-1.81476	9.00869	1	0	0
C9orf68	I-SPY	-2.47174	9.00869	1	1	0
MYLK	I-SPY	-6.47501	9.00869	1	1	0
TRIM14	I-SPY	-2.22833	9.00869	1	1	0
MMP19	I-SPY	-1.89989	9.00869	1	1	0
DCLK2	I-SPY	-3.62011	9.00869	1	0	0
IRS2	I-SPY	-2.67843	9.00869	1	1	0
ZNF451	I-SPY	-2.67707	9.00869	1	0	0
IP6K2	I-SPY	-1.99398	9.00869	1	0	0
WDR13	I-SPY	-1.75181	9.00869	1	1	1
SNIP1	I-SPY	-4.10143	9.00869	1	0	0
CFLAR	I-SPY	-3.3184	9.00869	1	0	0
KLF4	I-SPY	-3.06292	9.00869	1	0	0
IER2	I-SPY	-2.26932	9.00869	1	0	0
MSL2	I-SPY	-1.53337	9.00869	1	0	0
SLC6A15	I-SPY	-2.60829	9.00869	1	0	0
SRSF5	I-SPY	-2.56285	9.00869	1	1	0
FANCD2	I-SPY	-3.45489	9.00869	1	0	0
ELF1	I-SPY	-2.07231	9.00869	1	1	0
AJAP1	I-SPY	-2.79808	9.00869	1	1	1
LPPR1	I-SPY	-2.0231	9.00869	1	1	0
TOX	I-SPY	-4.18409	9.00869	1	0	0
MRE11A	I-SPY	-1.48382	9.00869	1	1	1
OGFOD1	I-SPY	-3.05394	9.00869	1	0	0
CEP192	I-SPY	-4.80951	9.00869	1	1	0
PKP1	I-SPY	-1.40479	9.00869	1	0	0
RNF146	I-SPY	-2.93731	9.00869	1	0	0
FAM82A1	I-SPY	-6.43694	9.00869	1	1	1
C15orf61	I-SPY	-2.31394	9.00869	1	0	0
GCHFR	I-SPY	-2.52499	9.00869	1	1	0
LOC100507412	I-SPY	-2.01447	9.00869	1	1	0
PERP	I-SPY	-3.14691	9.00869	1	0	0
LOC348120	I-SPY	-2.53654	9.00869	1	0	0
LRRC3B	I-SPY	-1.46172	9.00869	1	0	0
MDM2	I-SPY	-0.936566	9.00869	1	1	0
CCDC123	I-SPY	-1.89023	9.00869	1	1	0
MST1R	I-SPY	-2.55557	9.00869	1	1	1
SIN3B	I-SPY	-1.4488	9.00869	1	1	0
KLB	I-SPY	-2.65373	9.00869	1	1	1
FASTK	I-SPY	-2.03737	9.00869	1	0	0
RTTN	I-SPY	-10.4517	9.00869	1	1	1
DSEL	I-SPY	-3.76942	9.00869	1	1	0
PRRT1	I-SPY	-1.53182	9.00869	1	1	0
PCK1	I-SPY	-0.963847	9.00869	1	1	0
MMP13	I-SPY	-2.27346	9.00869	1	1	1
MIR100HG	I-SPY	-2.81826	9.00869	1	0	0
NRBP2	I-SPY	-2.15957	9.00869	1	1	1
SELE	I-SPY	-3.75667	9.00869	1	0	0
NAT8	I-SPY	-1.90725	9.00869	1	0	0
EGR4	I-SPY	-1.93696	9.00869	1	0	0
NR4A1	I-SPY	-3.31256	9.00869	1	0	0
ASGR2	I-SPY	-2.12723	9.00869	1	0	0
ZNF711	I-SPY	-3.45161	9.00869	1	1	0
ADCK2	I-SPY	-1.93256	9.00869	1	0	0
SIX1	I-SPY	-1.82328	9.00869	1	1	1
LOC728392	I-SPY	-2.37528	9.00869	1	1	1
AASDH	I-SPY	-2.18704	9.00869	1	0	0
C2orf56	I-SPY	-1.62671	9.00869	1	0	0
C12orf39	I-SPY	-2.04793	9.00869	1	0	0
CXCL1	I-SPY	-1.10321	9.00869	1	1	0
MAFK	I-SPY	-1.72821	9.00869	1	1	0
VCX3A	I-SPY	-4.51955	9.00869	1	0	0
TMCO5A	I-SPY	-2.97671	9.00869	1	1	1
LPHN2	I-SPY	-7.04786	9.00869	1	1	0
FLJ35024	I-SPY	-2.75799	9.00869	1	1	0
SLC16A14	I-SPY	-2.68469	9.00869	1	1	0
RRP7B	I-SPY	-2.0143	9.00869	1	1	0
SHC4	I-SPY	-3.37626	9.00869	1	0	0
ADAM30	I-SPY	-1.95147	9.00869	1	0	0
C7orf71	I-SPY	-1.62874	9.00869	1	1	1
KLHL13	I-SPY	-4.20489	9.00869	1	0	0
PPP2R2B	I-SPY	-3.82207	9.00869	1	1	0
RNF126	I-SPY	-1.68618	9.00869	1	1	0
ZCCHC24	I-SPY	-2.91568	9.00869	1	1	0
KLHDC2	I-SPY	-10.7209	9.00869	1	1	0
CHMP4C	I-SPY	-3.41504	9.00869	1	1	1
ANKMY2	I-SPY	-2.19503	9.00869	1	0	0
RRM2B	I-SPY	-0.909957	9.00869	1	1	0
CDC42EP3	I-SPY	-1.57099	9.00869	1	1	1
TRIM29	I-SPY	-2.02434	9.00869	1	1	0
DUSP2	I-SPY	-5.51264	9.00869	1	1	0
DGKH	I-SPY	-1.99042	9.00869	1	0	0
FASTKD2	I-SPY	-2.19655	9.00869	1	0	0
SNX12	I-SPY	-3.06484	9.00869	1	0	0
ZMYND15	I-SPY	-2.04719	9.00869	1	0	0
ARID5B	I-SPY	-2.82316	9.00869	1	1	0
LGALS4	I-SPY	-1.89746	9.00869	1	1	1
LARP6	I-SPY	-2.58215	9.00869	1	0	0
IL1RAP	I-SPY	-1.81842	9.00869	1	1	1
C10orf18	I-SPY	-5.02484	9.00869	1	0	0
ITGA7	I-SPY	-1.67712	9.00869	1	1	0
RHOXF2B	I-SPY	-1.6235	9.00869	1	0	0
ABCD1	I-SPY	-1.80248	9.00869	1	0	0
DCT	I-SPY	-1.52552	9.00869	1	0	0
RNF6	I-SPY	126.787	9.00869	1	1	0
PCDH9	I-SPY	-3.16227	9.00869	1	0	0
MPHOSPH6	I-SPY	-2.67298	9.00869	1	1	0
PRAMEF1	I-SPY	-1.13927	9.00869	1	1	1
JRKL	I-SPY	-3.42027	9.00869	1	1	1
SNRNP48	I-SPY	-3.14093	9.00869	1	0	0
IL17D	I-SPY	-5.23956	9.00869	1	0	0
BACE2	I-SPY	-2.63951	9.00869	1	0	0
WDR4	I-SPY	-0.960401	9.00869	1	0	0
VMP1	I-SPY	-2.00305	9.00869	1	0	0
IRF2BPL	I-SPY	-3.26505	9.00869	1	0	0
ST8SIA2	I-SPY	-2.63123	9.00869	1	0	0
CALM3	I-SPY	-6.15722	9.00869	1	1	1
RAB3B	I-SPY	-2.0676	9.00869	1	1	0
JOSD1	I-SPY	-2.25142	9.00869	1	0	0
ANKRD49	I-SPY	-2.24448	9.00869	1	1	0
DUSP5	I-SPY	-3.24322	9.00869	1	1	1
GTF3C1	I-SPY	-1.22436	9.00869	1	1	0
SMYD1	I-SPY	-2.18185	9.00869	1	0	0
NEDD9	I-SPY	-2.65744	9.00869	1	0	0
APOH	I-SPY	-1.60167	9.00869	1	0	0
NEK3	I-SPY	-2.85429	9.00869	1	1	0
LPCAT4	I-SPY	-2.08956	9.00869	1	0	0
MOBKL2B	I-SPY	-3.91407	9.00869	1	1	0
MAP7D3	I-SPY	-3.88179	9.00869	1	0	0
GNAI1	I-SPY	-1.93294	9.00869	1	1	1
FAM19A1	I-SPY	-2.41392	9.00869	1	0	0
AKAP14	I-SPY	-2.04506	9.00869	1	1	0
MAFG	I-SPY	-1.9207	9.00869	1	1	0
ESYT2	I-SPY	-6.40388	9.00869	1	1	0
SYN2	I-SPY	-3.06339	9.00869	1	0	0
LOC388789	I-SPY	-2.13683	9.00869	1	0	0
CX3CR1	I-SPY	-7.2911	9.00869	1	1	0
FAM165B	I-SPY	-2.85655	9.00869	1	1	0
SAV1	I-SPY	-3.05524	9.00869	1	1	0
TMEM68	I-SPY	-2.33334	9.00869	1	0	0
FAM131C	I-SPY	-1.80699	9.00869	1	0	0
TAF1	I-SPY	-1.625	9.00869	1	1	1
C7orf70	I-SPY	-3.88522	9.00869	1	1	1
LOC253842	I-SPY	-1.72938	9.00869	1	1	0
CA10	I-SPY	-1.1662	9.00869	1	1	0
MME	I-SPY	-2.50393	9.00869	1	0	0
APOM	I-SPY	-2.21393	9.00869	1	0	0
IGF2BP2	I-SPY	-2.77419	9.00869	1	0	0
TCL6	I-SPY	-2.90884	9.00869	1	1	0
ADAMTSL2	I-SPY	-3.02576	9.00869	1	0	0
ZNF318	I-SPY	-3.06758	9.00869	1	0	0
LAMTOR2	I-SPY	-3.03592	9.00869	1	0	0
NUP35	I-SPY	-2.32234	9.00869	1	0	0
ZNF169	I-SPY	-3.8908	9.00869	1	1	0
LINS	I-SPY	-1.51572	9.00869	1	0	0
DMD	I-SPY	-2.55556	9.00869	1	0	0
FEZ2	I-SPY	-4.6739	9.00869	1	0	0
GTF2E1	I-SPY	-6.33859	9.00869	1	1	1
HSPC159	I-SPY	-3.12022	9.00869	1	0	0
METTL13	I-SPY	-0.818965	9.00869	1	1	0
C1orf104	I-SPY	-1.98401	9.00869	1	0	0
CPSF7	I-SPY	-1.10084	9.00869	1	1	0
CA14	I-SPY	-2.67571	9.00869	1	0	0
LOC152217	I-SPY	-2.12357	9.00869	1	1	0
CRISPLD1	I-SPY	-4.08317	9.00869	1	0	0
HIAT1	I-SPY	-3.90245	9.00869	1	0	0
HACL1	I-SPY	-3.79308	9.00869	1	0	0
VPS36	I-SPY	-2.98387	9.00869	1	0	0
CRHBP	I-SPY	-14.6245	9.00869	1	1	0
PLB1	I-SPY	-2.72379	9.00869	1	1	0
FGL1	I-SPY	-2.08364	9.00869	1	1	0
PPP2R3C	I-SPY	-3.1794	9.00869	1	0	0
XPR1	I-SPY	-2.14334	9.00869	1	1	0
MAMLD1	I-SPY	-1.98298	9.00869	1	0	0
LOC100128176	I-SPY	-2.97331	9.00869	1	0	0
GDA	I-SPY	-1.91214	9.00869	1	1	0
AMPD1	I-SPY	-3.58881	9.00869	1	1	1
CCNL1	I-SPY	-2.4647	9.00869	1	1	1
CPVL	I-SPY	-3.44682	9.00869	1	1	1
PTP4A1	I-SPY	-2.00448	9.00869	1	0	0
PNLIPRP2	I-SPY	-2.20136	9.00869	1	1	0
ZNF709	I-SPY	-3.07689	9.00869	1	1	0
ZFP64	I-SPY	-1.99692	9.00869	1	0	0
ZFYVE9	I-SPY	-1.48698	9.00869	1	1	1
STK17B	I-SPY	-4.29153	9.00869	1	0	0
SLC39A5	I-SPY	-2.00368	9.00869	1	0	0
IQCF6	I-SPY	-2.30827	9.00869	1	0	0
UBASH3B	I-SPY	-4.2529	9.00869	1	1	1
LOC100129973	I-SPY	-8.24586	9.00869	1	1	0
VPS33B	I-SPY	-2.12006	9.00869	1	0	0
PPP1R3A	I-SPY	-2.3007	9.00869	1	0	0
ICAM5	I-SPY	-2.53886	9.00869	1	0	0
PLCB1	I-SPY	-3.37565	9.00869	1	0	0
NRCAM	I-SPY	-3.31921	9.00869	1	0	0
PSG8	I-SPY	-1.7707	9.00869	1	0	0
CACNA2D3	I-SPY	-2.19969	9.00869	1	0	0
TSPAN2	I-SPY	-3.99127	9.00869	1	1	0
FOXJ2	I-SPY	-5.64275	9.00869	1	1	0
BHLHE41	I-SPY	-6.04575	9.00869	1	1	0
FBRS	I-SPY	-6.25065	9.00869	1	1	0
CDC14A	I-SPY	-2.80637	9.00869	1	1	0
KATNAL1	I-SPY	-2.86606	9.00869	1	1	0
ZNF292	I-SPY	-1.4726	9.00869	1	0	0
MAML2	I-SPY	-3.95899	9.00869	1	1	0
TOM1L2	I-SPY	-1.84365	9.00869	1	1	0
METTL21A	I-SPY	-3.25415	9.00869	1	0	0
COX17	I-SPY	-1.98909	9.00869	1	1	1
DZIP1	I-SPY	-7.03883	9.00869	1	1	0
CWF19L2	I-SPY	-2.39677	9.00869	1	1	1
LEFTY2	I-SPY	-2.11055	9.00869	1	1	0
C17orf51	I-SPY	-1.52641	9.00869	1	1	0
EFNA1	I-SPY	-1.88032	9.00869	1	0	0
SLPI	I-SPY	-1.87374	9.00869	1	1	0
LIMS3	I-SPY	-4.06975	9.00869	1	1	0
SPAST	I-SPY	-6.66884	9.00869	1	1	0
FLJ43489	I-SPY	-3.48573	9.00869	1	1	0
CHD5	I-SPY	-1.36342	9.00869	1	1	0
FAM3C	I-SPY	-2.91288	9.00869	1	1	0
C7orf63	I-SPY	-4.09498	9.00869	1	1	0
CNOT8	I-SPY	-3.11779	9.00869	1	1	0
TBX1	I-SPY	-1.18394	9.00869	1	1	0
SLC17A7	I-SPY	-1.77801	9.00869	1	1	0
C3orf1	I-SPY	-1.65968	9.00869	1	0	0
DUSP6	I-SPY	-4.10852	9.00869	1	0	0
C19orf57	I-SPY	-2.04686	9.00869	1	1	0
AMIGO2	I-SPY	-2.75277	9.00869	1	0	0
VPS54	I-SPY	-2.30659	9.00869	1	1	1
PTPRZ1	I-SPY	-3.59892	9.00869	1	0	0
HIC2	I-SPY	-3.41945	9.00869	1	1	0
CILP2	I-SPY	-5.22091	9.00869	1	1	0
ZNF76	I-SPY	-1.12106	9.00869	1	0	0
ERGIC1	I-SPY	-2.07811	9.00869	1	0	0
KALRN	I-SPY	-1.2176	9.00869	1	1	1
LDLRAP1	I-SPY	-1.39107	9.00869	1	0	0
SEMA6D	I-SPY	-2.885	9.00869	1	0	0
HLF	I-SPY	-3.00908	9.00869	1	1	0
COMMD2	I-SPY	-6.4399	9.00869	1	1	1
PFKFB4	I-SPY	-2.0701	9.00869	1	0	0
SERPINB6	I-SPY	-3.032	9.00869	1	1	1
SRP19	I-SPY	-1.78228	9.00869	1	1	0
AVPI1	I-SPY	-1.35586	9.00869	1	0	0
RPRD1A	I-SPY	-3.38742	9.00869	1	1	0
FAM82A2	I-SPY	-1.79756	9.00869	1	0	0
ZNF81	I-SPY	-5.36486	9.00869	1	1	0
HMMR	I-SPY	-3.7298	9.00869	1	1	0
MGP	I-SPY	-2.06603	9.00869	1	1	1
FOXC1	I-SPY	-2.88339	9.00869	1	0	0
EPB41L2	I-SPY	-3.94015	9.00869	1	1	0
COL22A1	I-SPY	-4.52655	9.00869	1	0	0
POLE2	I-SPY	-1.77899	9.00869	1	1	0
GABBR2	I-SPY	-2.8702	9.00869	1	1	1
SLC30A3	I-SPY	-1.33467	9.00869	1	1	1
FOXJ3	I-SPY	-4.46041	9.00869	1	1	1
LOC100506144	I-SPY	-4.98563	9.00869	1	1	0
NR2C1	I-SPY	-2.65661	9.00869	1	1	0
CTGF	I-SPY	-4.97455	9.00869	1	0	0
HRCT1	I-SPY	-2.78081	9.00869	1	1	1
ETS2	I-SPY	-2.45146	9.00869	1	0	0
RAB11FIP5	I-SPY	-2.58453	9.00869	1	0	0
PPARGC1A	I-SPY	-2.86003	9.00869	1	0	0
PGAP1	I-SPY	-2.60132	9.00869	1	0	0
NCEH1	I-SPY	-1.30282	9.00869	1	1	1
GPR109A	I-SPY	-1.30222	9.00869	1	1	0
ATF3	I-SPY	-2.49803	9.00869	1	0	0
ALDH1A2	I-SPY	-2.52181	9.00869	1	0	0
RBMS3	I-SPY	-4.09915	9.00869	1	0	0
CXCR7	I-SPY	-2.38788	9.00869	1	1	1
RASSF4	I-SPY	-1.43148	9.00869	1	0	0
C3orf31	I-SPY	-1.27002	9.00869	1	0	0
PRSS12	I-SPY	-2.93709	9.00869	1	0	0
ID4	I-SPY	-7.74387	9.00869	1	1	0
UBE2E3	I-SPY	-2.49837	9.00869	1	0	0
LIMCH1	I-SPY	-1.69449	9.00869	1	1	1
SCHIP1	I-SPY	-3.54326	9.00869	1	0	0
FGF12	I-SPY	-1.63032	9.00869	1	1	0
FAM81A	I-SPY	-1.743	9.00869	1	1	0
ARFGAP3	I-SPY	-2.23705	9.00869	1	1	1
CDHR1	I-SPY	-2.79111	9.00869	1	1	0
CITED4	I-SPY	-4.31893	9.00869	1	1	1
BRWD3	I-SPY	-2.43139	9.00869	1	0	0
APPL1	I-SPY	-2.17646	9.00869	1	1	0
SBDSP1	I-SPY	-2.88045	9.00869	1	0	0
WIF1	I-SPY	-1.85533	9.00869	1	0	0
SCAI	I-SPY	-1.70864	9.00869	1	1	0
HMGXB4	I-SPY	-3.04472	9.00869	1	1	0
MLANA	I-SPY	-1.58489	9.00869	1	1	0
ATP5S	I-SPY	-2.4706	9.00869	1	0	0
SLC26A5	I-SPY	-1.11226	9.00869	1	1	0
ZNF576	I-SPY	-2.90374	9.00869	1	1	0
FGD4	I-SPY	-3.02737	9.00869	1	1	1
TDRD12	I-SPY	-2.56152	9.00869	1	0	0
TMEM133	I-SPY	-3.29166	9.00869	1	0	0
SLC2A3	I-SPY	-2.38614	9.00869	1	0	0
RND3	I-SPY	-2.98745	9.00869	1	1	0
PER1	I-SPY	-1.35981	9.00869	1	1	0
ZNF561	I-SPY	-2.04602	9.00869	1	0	0
TPRG1L	I-SPY	-2.45551	9.00869	1	1	0
TMEM186	I-SPY	-2.27512	9.00869	1	0	0
C14orf105	I-SPY	-2.21898	9.00869	1	0	0
PDK4	I-SPY	-4.1722	9.00869	1	0	0
ILKAP	I-SPY	-1.19414	9.00869	1	0	0
TM4SF1	I-SPY	-2.93133	9.00869	1	0	0
AMN1	I-SPY	-2.33485	9.00869	1	1	0
BVES	I-SPY	-2.55146	9.00869	1	1	0
CD160	I-SPY	-2.58313	9.00869	1	1	0
DCUN1D5	I-SPY	-3.29047	9.00869	1	1	0
CFL2	I-SPY	-10.4174	9.00869	1	1	1
NT5C3L	I-SPY	-2.20578	9.00869	1	1	1
LIX1	I-SPY	-2.68635	9.00869	1	0	0
PGAP2	I-SPY	-1.97296	9.00869	1	1	1
SUZ12P	I-SPY	-1.8623	9.00869	1	0	0
JAKMIP1	I-SPY	-2.20324	9.00869	1	1	0
TCTE3	I-SPY	-4.20355	9.00869	1	0	0
BHLHE40	I-SPY	-3.61332	9.00869	1	0	0
PRR14L	I-SPY	-1.14624	9.00869	1	1	0
RORA	I-SPY	-4.98636	9.00869	1	1	0
GSTA3	I-SPY	-2.18907	9.00869	1	1	0
KATNA1	I-SPY	-5.06485	9.00869	1	1	0
GPR61	I-SPY	-2.74981	9.00869	1	1	1
CTDSP1	I-SPY	-2.03271	9.00869	1	0	0
TGFBR3	I-SPY	-3.18948	9.00869	1	1	0
ETV5	I-SPY	-2.48292	9.00869	1	1	0
TFAP2C	I-SPY	-2.24954	9.00869	1	1	0
POLR1E	I-SPY	-2.01628	9.00869	1	1	0
CLIC6	I-SPY	-3.80756	9.00869	1	1	0
TRMT11	I-SPY	-4.28687	9.00869	1	0	0
C7orf58	I-SPY	-1.31448	9.00869	1	0	0
TRIM9	I-SPY	-2.60692	9.00869	1	0	0
TESC	I-SPY	-1.29595	9.00869	1	1	0
C12orf76	I-SPY	-4.18306	9.00869	1	1	0
FAM65C	I-SPY	-1.56645	9.00869	1	0	0
SOHLH2	I-SPY	-2.74239	9.00869	1	0	0
NEUROD4	I-SPY	-5.49842	9.00869	1	0	0
C2orf27A	I-SPY	-9.75016	9.00869	1	1	0
GKAP1	I-SPY	-2.17797	9.00869	1	0	0
KLHL3	I-SPY	-2.46336	9.00869	1	1	0
PPAPDC1A	I-SPY	-2.73565	9.00869	1	1	0
SLC9A2	I-SPY	-2.64131	9.00869	1	1	0
KLHL9	I-SPY	-3.21373	9.00869	1	1	0
CHST13	I-SPY	-2.2243	9.00869	1	0	0
BTG3	I-SPY	-3.6721	9.00869	1	1	1
ZNF782	I-SPY	-5.35008	9.00869	1	1	1
RGN	I-SPY	-2.58843	9.00869	1	0	0
SLC25A31	I-SPY	-3.34242	9.00869	1	1	0
NTNG1	I-SPY	-1.44299	9.00869	1	1	0
TLN2	I-SPY	-5.23099	9.00869	1	0	0
SEC61A1	I-SPY	-1.92125	9.00869	1	1	1
C6orf162	I-SPY	-1.68291	9.00869	1	1	0
FLJ43663	I-SPY	-2.57548	9.00869	1	0	0
OSBPL11	I-SPY	-3.38816	9.00869	1	0	0
SLCO4A1	I-SPY	-1.61773	9.00869	1	1	0
RUSC2	I-SPY	-3.31435	9.00869	1	1	0
C7orf55	I-SPY	-2.01013	9.00869	1	1	0
PTGIS	I-SPY	-5.13305	9.00869	1	1	0
LRRC18	I-SPY	-2.88327	9.00869	1	0	0
MPV17	I-SPY	-2.7828	9.00869	1	0	0
KCNJ13	I-SPY	-1.5289	9.00869	1	1	0
FTH1	I-SPY	-2.25225	9.00869	1	1	0
CAND2	I-SPY	-1.66855	9.00869	1	1	0
MOSPD1	I-SPY	-2.21461	9.00869	1	0	0
TMEM139	I-SPY	-3.40652	9.00869	1	0	0
LOC285181	I-SPY	-1.60274	9.00869	1	1	1
PDE1A	I-SPY	-3.19332	9.00869	1	1	0
MRPS5	I-SPY	-1.82628	9.00869	1	0	0
SLC9A6	I-SPY	-3.19801	9.00869	1	1	0
GP9	I-SPY	-2.64129	9.00869	1	0	0
ODZ1	I-SPY	-4.726	9.00869	1	1	0
C3orf37	I-SPY	-2.10353	9.00869	1	1	0
ODZ3	I-SPY	-1.63514	9.00869	1	0	0
EPC1	I-SPY	-3.50986	9.00869	1	0	0
FZD7	I-SPY	-7.4734	9.00869	1	0	0
DIRC2	I-SPY	-3.38802	9.00869	1	1	0
RPS6KA5	I-SPY	-5.0552	9.00869	1	1	0
ANKS6	I-SPY	-1.82628	9.00869	1	1	1
USP54	I-SPY	-3.58465	9.00869	1	1	0
EIF2C4	I-SPY	-3.26685	9.00869	1	0	0
CHST14	I-SPY	-3.16209	9.00869	1	1	0
SOSTDC1	I-SPY	-3.43253	9.00869	1	1	0
TRIO	I-SPY	-2.46163	9.00869	1	0	0
ATAD3B	I-SPY	-2.16912	9.00869	1	1	0
LOC284408	I-SPY	-1.73338	9.00869	1	1	0
WWP2	I-SPY	-3.19307	9.00869	1	1	0
C5orf25	I-SPY	-4.07176	9.00869	1	0	0
MAOA	I-SPY	-1.51475	9.00869	1	1	0
EDNRB	I-SPY	-2.84214	9.00869	1	0	0
PMPCB	I-SPY	-2.27012	9.00869	1	1	0
ARHGEF25	I-SPY	-1.98034	9.00869	1	0	0
JUND	I-SPY	-8.88554	9.00869	1	0	0
EDN3	I-SPY	-3.90586	9.00869	1	1	0
FLVCR1	I-SPY	-1.55558	9.00869	1	1	0
NUDCD2	I-SPY	-4.11134	9.00869	1	1	0
EGR2	I-SPY	-6.02225	9.00869	1	0	0
SIRPD	I-SPY	-4.59279	9.00869	1	1	1
LOC100130428	I-SPY	-3.80322	9.00869	1	1	0
EGR1	I-SPY	-2.81954	9.00869	1	0	0
C12orf53	I-SPY	-3.32166	9.00869	1	1	0
DCAF15	I-SPY	-2.25559	9.00869	1	1	0
PTS	I-SPY	-2.9019	9.00869	1	0	0
RAD51L1	I-SPY	-2.03296	9.00869	1	0	0
ACYP1	I-SPY	-2.62505	9.00869	1	1	0
PAR5	I-SPY	-1.70513	9.00869	1	0	0
DTX3	I-SPY	-2.82021	9.00869	1	1	0
PTAR1	I-SPY	-3.64305	9.00869	1	0	0
PHLDA1	I-SPY	-3.11392	9.00869	1	0	0
PLEKHG3	I-SPY	-1.6062	9.00869	1	0	0
LRRC49	I-SPY	-3.24921	9.00869	1	1	0
ARMCX5	I-SPY	-5.00695	9.00869	1	1	0
C10orf118	I-SPY	-1.5349	9.00869	1	1	0
DDN	I-SPY	-2.2487	9.00869	1	1	0
HRASLS	I-SPY	-3.10616	9.00869	1	0	0
COQ10A	I-SPY	-3.09733	9.00869	1	0	0
TNMD	I-SPY	-1.47982	9.00869	1	1	1
SSTR1	I-SPY	-2.25839	9.00869	1	0	0
ZNF498	I-SPY	-3.2659	9.00869	1	0	0
TSSC1	I-SPY	-3.65747	9.00869	1	0	0
HS2ST1	I-SPY	-2.66735	9.00869	1	1	1
C12orf49	I-SPY	-3.60624	9.00869	1	1	0
MAT2A	I-SPY	-1.25689	9.00869	1	1	0
CNTN6	I-SPY	-1.48503	9.00869	1	1	0
WWOX	I-SPY	-3.9649	9.00869	1	0	0
CCDC76	I-SPY	-2.25854	9.00869	1	1	0
TMEM170A	I-SPY	-2.3745	9.00869	1	1	0
OMG	I-SPY	-1.7156	9.00869	1	1	0
ZNF831	I-SPY	-2.82652	9.00869	1	1	0
NOV	I-SPY	-3.6579	9.00869	1	0	0
PRKCE	I-SPY	-1.86994	9.00869	1	0	0
PCTP	I-SPY	-2.47804	9.00869	1	1	1
RGS1	I-SPY	-3.4313	9.00869	1	0	0
PSD2	I-SPY	-2.57444	9.00869	1	0	0
SAMD5	I-SPY	-1.95795	9.00869	1	1	0
CRY2	I-SPY	-3.80645	9.00869	1	1	0
ROM1	I-SPY	-2.31807	9.00869	1	1	1
SYT4	I-SPY	-2.75147	9.00869	1	0	0
VGLL2	I-SPY	-2.5552	9.00869	1	0	0
MORF4L2	I-SPY	-3.45601	9.00869	1	0	0
SCGB1A1	I-SPY	-3.9968	9.00869	1	1	0
SPRY1	I-SPY	-2.33139	9.00869	1	0	0
SULT1C2	I-SPY	-1.67839	9.00869	1	0	0
OGN	I-SPY	-2.43037	9.00869	1	1	0
ARMCX1	I-SPY	-44.2579	9.00869	1	1	1
SCAF8	I-SPY	-2.80481	9.00869	1	1	0
NSUN5P2	I-SPY	-1.21439	9.00869	1	0	0
SLC22A23	I-SPY	-1.85278	9.00869	1	0	0
SGK1	I-SPY	-2.77305	9.00869	1	0	0
SESN2	I-SPY	-2.45756	9.00869	1	1	0
HECTD2	I-SPY	-2.28943	9.00869	1	0	0
CWC22	I-SPY	-2.68063	9.00869	1	0	0
TMEM45B	I-SPY	-3.90984	9.00869	1	0	0
MBD4	I-SPY	-3.47059	9.00869	1	0	0
PHF3	I-SPY	-4.02904	9.00869	1	0	0
PDLIM3	I-SPY	-3.27354	9.00869	1	0	0
H1F0	I-SPY	-2.497	9.00869	1	1	0
SERPINB9	I-SPY	-2.08583	9.00869	1	0	0
CHCHD3	I-SPY	-2.79887	9.00869	1	1	0
ACACB	I-SPY	-4.13722	9.00869	1	0	0
NUMB	I-SPY	-2.42899	9.00869	1	1	0
RUVBL1	I-SPY	-1.57859	9.00869	1	0	0
CDC42SE2	I-SPY	-2.87111	9.00869	1	1	1
SERPINC1	I-SPY	-1.37479	9.00869	1	0	0
MED23	I-SPY	-1.221	9.00869	1	0	0
INPP1	I-SPY	-2.38875	9.00869	1	0	0
FLYWCH1	I-SPY	-2.57748	9.00869	1	1	1
LOC285733	I-SPY	-2.44181	9.00869	1	0	0
RPS12	I-SPY	-2.46867	9.00869	1	0	0
IPPK	I-SPY	-1.62287	9.00869	1	1	0
GABRE	I-SPY	-0.835226	9.00869	1	1	1
SLC35F1	I-SPY	-4.60337	9.00869	1	1	0
S100B	I-SPY	-1.66774	9.00869	1	1	1
RGS2	I-SPY	-2.45671	9.00869	1	0	0
ITGB7	I-SPY	-2.03232	9.00869	1	1	0
LOC100130275	I-SPY	-4.07074	9.00869	1	0	0
SOX10	I-SPY	-1.70319	9.00869	1	1	0
LTN1	I-SPY	-6.67879	9.00869	1	1	0
LOC284244	I-SPY	-5.78892	9.00869	1	0	0
LOC440944	I-SPY	-1.83104	9.00869	1	0	0
HRK	I-SPY	-1.66942	9.00869	1	1	0
FAM166B	I-SPY	-3.4806	9.00869	1	1	0
TARBP1	I-SPY	-1.23845	9.00869	1	1	0
KIF26A	I-SPY	-1.96536	9.00869	1	0	0
TMEFF2	I-SPY	-1.89037	9.00869	1	0	0
LOC388276	I-SPY	-0.661683	9.00869	1	1	0
KCNJ1	I-SPY	-2.49724	9.00869	1	1	0
EML5	I-SPY	-2.98594	9.00869	1	1	0
PMEPA1	I-SPY	-1.95595	9.00869	1	1	0
FAM89A	I-SPY	-2.84663	9.00869	1	1	0
PAAF1	I-SPY	-2.29381	9.00869	1	0	0
CCDC51	I-SPY	-2.52368	9.00869	1	0	0
PCOLCE2	I-SPY	-1.4816	9.00869	1	0	0
VEPH1	I-SPY	-1.70756	9.00869	1	1	1
SFRP2	I-SPY	-2.89064	9.00869	1	0	0
KIAA1107	I-SPY	-2.36628	9.00869	1	1	0
C1orf55	I-SPY	-2.93545	9.00869	1	0	0
CSDC2	I-SPY	-2.59647	9.00869	1	1	0
COBLL1	I-SPY	-1.39974	9.00869	1	1	0
C14orf104	I-SPY	-2.9737	9.00869	1	0	0
SESN1	I-SPY	-1.19088	9.00869	1	1	0
ABCB7	I-SPY	-4.80791	9.00869	1	1	0
KLRK1	I-SPY	-2.17991	9.00869	1	1	1
MED19	I-SPY	-2.52437	9.00869	1	0	0
SLC30A10	I-SPY	-2.39027	9.00869	1	0	0
SENP3	I-SPY	-1.82757	9.00869	1	0	0
ABHD13	I-SPY	-2.80995	9.00869	1	1	1
FAM48A	I-SPY	-4.85275	9.00869	1	1	0
MCPH1	I-SPY	-2.40281	9.00869	1	1	0
LOC100190939	I-SPY	-1.67894	9.00869	1	1	1
DOK5	I-SPY	-4.09664	9.00869	1	0	0
SKA2	I-SPY	-2.32452	9.00869	1	0	0
PAGE1	I-SPY	-2.18711	9.00869	1	0	0
PDE2A	I-SPY	-2.19382	9.00869	1	1	0
JUN	I-SPY	-2.88854	9.00869	1	0	0
ST6GALNAC5	I-SPY	-2.52541	9.00869	1	0	0
ANKFY1	I-SPY	-1.65816	9.00869	1	1	1
DMKN	I-SPY	-2.02581	9.00869	1	1	0
DAG1	I-SPY	-2.61649	9.00869	1	1	1
DNER	I-SPY	-1.53475	9.00869	1	0	0
KBTBD6	I-SPY	-3.63459	9.00869	1	1	1
TMEM221	I-SPY	-2.30096	9.00869	1	0	0
PRM1	I-SPY	-1.76482	9.00869	1	0	0
ACSM3	I-SPY	-1.30829	9.00869	1	1	0
C1orf130	I-SPY	-3.69453	9.00869	1	1	0
LOC285205	I-SPY	-0.990318	9.00869	1	1	0
ANKRD57	I-SPY	-1.88762	9.00869	1	1	0
CAPN3	I-SPY	-1.73417	9.00869	1	0	0
GPM6B	I-SPY	-2.42318	9.00869	1	0	0
GLIS2	I-SPY	-2.11554	9.00869	1	1	0
KLHL24	I-SPY	-2.83678	9.00869	1	1	0
ANAPC10	I-SPY	-2.47584	9.00869	1	0	0
C18orf18	I-SPY	-3.73828	9.00869	1	0	0
LOC494558	I-SPY	-1.89652	9.00869	1	1	1
VAV1	I-SPY	-4.1863	9.00869	1	1	0
GDF3	I-SPY	-2.04434	9.00869	1	0	0
TMEM123	I-SPY	-1.70662	9.00869	1	1	0
SGCA	I-SPY	-2.59582	9.00869	1	1	0
PELI2	I-SPY	-2.61453	9.00869	1	0	0
GAS6	I-SPY	-2.5468	9.00869	1	1	0
C6orf164	I-SPY	-1.78743	9.00869	1	1	1
CCDC90B	I-SPY	-1.9153	9.00869	1	0	0
KAL1	I-SPY	-2.59023	9.00869	1	0	0
DUXAP10	I-SPY	-2.13389	9.00869	1	1	0
BEX1	I-SPY	-1.52741	9.00869	1	1	0
ARMC8	I-SPY	-4.77844	9.00869	1	0	0
AMOTL2	I-SPY	-3.5126	9.00869	1	1	0
SYNM	I-SPY	-2.67716	9.00869	1	0	0
NTRK3	I-SPY	-3.00032	9.00869	1	0	0
PSG3	I-SPY	-1.29484	9.00869	1	1	1
SNX14	I-SPY	-2.51332	9.00869	1	0	0
LY6K	I-SPY	-1.4201	9.00869	1	1	0
NFKBIL1	I-SPY	-3.62099	9.00869	1	0	0
TRIM37	I-SPY	-3.1209	9.00869	1	1	0
HSPC157	I-SPY	-2.07653	9.00869	1	0	0
PPFIA4	I-SPY	-0.958865	9.00869	1	1	0
GABARAPL1	I-SPY	-2.82548	9.00869	1	1	1
BACH1	I-SPY	-8.42769	9.00869	1	1	1
ADAMTS5	I-SPY	-3.70539	9.00869	1	0	0
KIAA0564	I-SPY	-1.94546	9.00869	1	1	0
RBM3	I-SPY	-6.17431	9.00869	1	1	1
B3GAT2	I-SPY	-1.87825	9.00869	1	0	0
KIAA1143	I-SPY	-1.64867	9.00869	1	1	0
NUFIP1	I-SPY	-1.54357	9.00869	1	0	0
POU5F1	I-SPY	-1.25897	9.00869	1	1	0
PIGK	I-SPY	-3.28315	9.00869	1	0	0
THRB	I-SPY	-4.70809	9.00869	1	0	0
MED4	I-SPY	-3.49766	9.00869	1	1	0
BNC1	I-SPY	-2.68952	9.00869	1	1	1
ABCB6	I-SPY	-0.906498	9.00869	1	1	0
PCSK9	I-SPY	-1.94244	9.00869	1	0	0
LOC729852	I-SPY	-7.51091	9.00869	1	0	0
RCAN1	I-SPY	-2.99951	9.00869	1	1	1
FAM40A	I-SPY	-3.36242	9.00869	1	1	1
KCNF1	I-SPY	-3.86131	9.00869	1	1	1
LOC339400	I-SPY	-1.47115	9.00869	1	1	0
SHBG	I-SPY	-1.74269	9.00869	1	1	1
FBXO31	I-SPY	-1.60625	9.00869	1	0	0
SLC22A1	I-SPY	-3.0832	9.00869	1	1	0
NKG7	I-SPY	-2.2607	9.00869	1	1	0
CCDC22	I-SPY	-2.32204	9.00869	1	1	0
SLC36A1	I-SPY	-2.3128	9.00869	1	1	0
FLRT2	I-SPY	-2.30586	9.00869	1	0	0
COL7A1	I-SPY	-1.02792	9.00869	1	1	0
KIAA1430	I-SPY	-5.64084	9.00869	1	1	0
TMEM107	I-SPY	-1.51565	9.00869	1	1	1
ERMN	I-SPY	-1.79061	9.00869	1	1	0
LOC255512	I-SPY	-1.60648	9.00869	1	1	0
FAM158A	I-SPY	-3.24194	9.00869	1	0	0
APOLD1	I-SPY	-2.95747	9.00869	1	0	0
ZNF408	I-SPY	-1.89377	9.00869	1	1	0
CSNK1G2	I-SPY	-2.2887	9.00869	1	0	0
ANAPC1	I-SPY	-1.29207	9.00869	1	1	0
TMBIM4	I-SPY	-3.61981	9.00869	1	0	0
MID2	I-SPY	-3.65305	9.00869	1	1	0
C16orf80	I-SPY	-2.82651	9.00869	1	0	0
REEP6	I-SPY	-1.58308	9.00869	1	0	0
B3GNT5	I-SPY	-1.9262	9.00869	1	1	0
ZMYM1	I-SPY	-0.966552	9.00869	1	1	1
SNCA	I-SPY	-3.10831	9.00869	1	0	0
LRRC39	I-SPY	-2.58768	9.00869	1	1	0
RNF13	I-SPY	-2.48566	9.00869	1	1	0
THBD	I-SPY	-3.49041	9.00869	1	0	0
ATP5G3	I-SPY	-1.59068	9.00869	1	1	0
UNQ6975	I-SPY	-2.06471	9.00869	1	1	0
MASP1	I-SPY	-1.81275	9.00869	1	1	0
TPM1	I-SPY	-2.89988	9.00869	1	0	0
DMTF1	I-SPY	-2.27935	9.00869	1	0	0
LOC643749	I-SPY	-2.43812	9.00869	1	0	0
ZCCHC11	I-SPY	-5.20382	9.00869	1	0	0
TWIST1	I-SPY	-1.91234	9.00869	1	1	0
IFT74	I-SPY	-2.38067	9.00869	1	0	0
PDE7B	I-SPY	-2.08771	9.00869	1	1	1
TRO	I-SPY	-2.02093	9.00869	1	0	0
MAPK11	I-SPY	-1.63221	9.00869	1	0	0
C10orf54	I-SPY	-2.77792	9.00869	1	1	0
MUC15	I-SPY	-2.7465	9.00869	1	1	0
MPZ	I-SPY	-2.59689	9.00869	1	1	0
ZNF828	I-SPY	-3.86726	9.00869	1	0	0
TMEM42	I-SPY	-2.71827	9.00869	1	0	0
MICAL3	I-SPY	-1.60007	9.00869	1	1	0
GPATCH8	I-SPY	-4.20401	9.00869	1	1	1
RPL23AP7	I-SPY	-1.34472	9.00869	1	0	0
PCF11	I-SPY	-1.93274	9.00869	1	0	0
AQP5	I-SPY	-1.69872	9.00869	1	1	0
FRAS1	I-SPY	-2.78917	9.00869	1	1	0
C6orf35	I-SPY	-2.33727	9.00869	1	0	0
ARHGAP20	I-SPY	-2.45507	9.00869	1	1	1
JUNB	I-SPY	-2.46252	9.00869	1	0	0
GEM	I-SPY	-168.359	9.00869	1	1	1
NLGN3	I-SPY	-2.14348	9.00869	1	1	0
PER2	I-SPY	-2.35525	9.00869	1	1	0
SUCLG1	I-SPY	-2.25255	9.00869	1	0	0
ADAMTS1	I-SPY	-2.67962	9.00869	1	0	0
DIRAS3	I-SPY	-1.78522	9.00869	1	1	1
XPNPEP3	I-SPY	-1.70071	9.00869	1	1	0
TCTN2	I-SPY	-2.02054	9.00869	1	0	0
TMF1	I-SPY	-5.46475	9.00869	1	1	0
BCL6	I-SPY	-1.91929	9.00869	1	1	0
LOC283588	I-SPY	-2.98111	9.00869	1	0	0
TXNRD3	I-SPY	-3.73805	9.00869	1	0	0
CCDC47	I-SPY	-5.10471	9.00869	1	1	0
MPP6	I-SPY	-2.48976	9.00869	1	1	0
EIF1AY	I-SPY	-5.50516	9.00869	1	1	0
RWDD3	I-SPY	-3.25457	9.00869	1	1	0
NPAS2	I-SPY	-1.63147	9.00869	1	0	0
UCA1	I-SPY	-1.71811	9.00869	1	0	0
KIF7	I-SPY	-1.16848	9.00869	1	0	0
HKDC1	I-SPY	-2.6474	9.00869	1	0	0
EPAS1	I-SPY	-1.37597	9.00869	1	1	0
INHBC	I-SPY	-2.02432	9.00869	1	0	0
ALX1	I-SPY	-1.86475	9.00869	1	0	0
ARL4D	I-SPY	-1.73268	9.00869	1	1	0
PEX5L	I-SPY	-1.87377	9.00869	1	1	0
TOMM7	I-SPY	-2.35175	9.00869	1	0	0
INPP4A	I-SPY	-1.9481	9.00869	1	0	0
ZSWIM5	I-SPY	-1.48991	9.00869	1	1	0
NUDT10	I-SPY	-2.28455	9.00869	1	0	0
PPT2	I-SPY	-1.48496	9.00869	1	1	1
WDR75	I-SPY	-3.63488	9.00869	1	1	0
KIAA1644	I-SPY	-1.75513	9.00869	1	0	0
TMEM229B	I-SPY	-2.92957	9.00869	1	1	0
KCNMA1	I-SPY	-2.73473	9.00869	1	1	1
TMOD3	I-SPY	-6.92991	9.00869	1	1	1
KLHL29	I-SPY	-2.97537	9.00869	1	1	0
FITM1	I-SPY	-2.80387	9.00869	1	0	0
SIPA1L1	I-SPY	-7.75685	9.00869	1	1	0
RPS9	I-SPY	-1.84195	9.00869	1	0	0
CHCHD2	I-SPY	-2.17929	9.00869	1	1	0
C10orf10	I-SPY	-3.59129	9.00869	1	0	0
ZBTB20	I-SPY	-1.58882	9.00869	1	1	0
KRT28	I-SPY	-3.68093	9.00869	1	0	0
BAIAP2	I-SPY	-4.41611	9.00869	1	1	0
RPAP2	I-SPY	-2.32541	9.00869	1	1	0
CIB1	I-SPY	-5.19751	9.00869	1	0	0
FAM122C	I-SPY	-3.93931	9.00869	1	1	0
BFSP1	I-SPY	-2.02108	9.00869	1	1	0
C12orf24	I-SPY	-2.12356	9.00869	1	0	0
GNB5	I-SPY	-2.73546	9.00869	1	1	0
BBX	I-SPY	-4.33379	9.00869	1	1	1
CDKN2A	I-SPY	-2.03507	9.00869	1	1	0
LRP4	I-SPY	-1.28291	9.00869	1	1	0
NIF3L1	I-SPY	-3.32871	9.00869	1	0	0
HBEGF	I-SPY	-3.67114	9.00869	1	1	0
ADAM23	I-SPY	-2.71029	9.00869	1	1	0
KRT222	I-SPY	-3.36406	9.00869	1	1	0
MGAT5B	I-SPY	-2.20496	9.00869	1	1	0
UGT8	I-SPY	-2.92076	9.00869	1	1	0
GPC3	I-SPY	-2.00438	9.00869	1	0	0
TRIM52	I-SPY	-1.9377	9.00869	1	0	0
ARID5A	I-SPY	-1.81005	9.00869	1	1	1
MEIS2	I-SPY	-3.23353	9.00869	1	0	0
EFCAB1	I-SPY	-1.94171	9.00869	1	0	0
EIF5A2	I-SPY	-4.28214	9.00869	1	0	0
EXOC4	I-SPY	-0.925772	9.00869	1	1	1
FAM135A	I-SPY	-2.89121	9.00869	1	1	0
AOC3	NEO	1.42498	0	1	1	1
LRFN5	NEO	2.09352	0.0968565	1	1	0
CHD2	NEO	1.04224	1.63399	1	1	0
ACOX2	NEO	1.74488	0	1	1	1
HLX	NEO	1.1779	2.29546	1	1	0
PNISR	NEO	1.04457	3.15142	1	1	0
PLLP	NEO	1.3018	9.43789	1	0	0
ADAMTSL1	NEO	1.78308	0	1	1	1
ADAM23	NEO	1.4096	1.02825	1	1	0
TENM1	NEO	3.08038	0.154253	1	1	0
MYCT1	NEO	1.28969	0.264434	1	1	0
TUBG2	NEO	1.13962	1.63399	1	1	0
FAM129A	NEO	1.13216	1.63399	1	1	0
FAM43A	NEO	1.28223	2.29546	1	1	0
CC2D2A	NEO	1.2007	7.33284	1	0	0
PRR3	NEO	1.08252	11.7851	1	0	0
MTMR9	NEO	1.04607	11.7851	1	0	0
ANKRD29	NEO	1.61072	0	1	1	1
SYNC	NEO	1.33656	1.63399	1	1	0
ECM2	NEO	1.33419	0	1	1	1
SAMD5	NEO	1.92332	7.33284	1	0	0
NMT2	NEO	1.13261	1.63399	1	1	0
MDM2	NEO	1.0723	1.02825	1	1	0
CD34	NEO	1.21944	0.154253	1	1	0
SOBP	NEO	1.35718	0.42581	1	1	0
OSR1	NEO	1.47537	1.63399	1	1	0
RASSF8	NEO	1.11737	1.02825	1	1	0
TGFB3	NEO	1.12028	7.33284	1	0	0
RBMS2	NEO	1.09816	5.79082	1	0	0
LRMP	NEO	1.14541	9.43789	1	0	0
CALHM2	NEO	1.09151	7.33284	1	0	0
RIN3	NEO	1.15667	11.7851	1	0	0
PPP1R12C	NEO	1.04568	9.43789	1	0	0
FGF2	NEO	1.51297	0.0968565	1	1	0
CLMP	NEO	1.18398	0	1	1	1
CTHRC1	NEO	1.07721	9.43789	1	0	0
CYTH3	NEO	1.09172	7.33284	1	0	0
SLC7A2	NEO	1.31191	4.15839	1	1	0
STK32B	NEO	1.43011	7.33284	1	0	0
ARNT	NEO	1.07494	1.63399	1	1	0
RND3	NEO	1.07812	11.7851	1	0	0
LTBP2	NEO	1.09165	11.7851	1	0	0
SPTAN1	NEO	1.03246	11.7851	1	0	0
PDE8B	NEO	1.58023	7.33284	1	0	0
ABCA6	NEO	1.41877	0	1	1	1
RIN2	NEO	1.06445	5.79082	1	0	0
ABCA1	NEO	1.1252	1.63399	1	1	0
ZDHHC1	NEO	1.25776	2.29546	1	1	0
LENG1	NEO	1.05491	4.15839	1	1	0
GALC	NEO	1.05014	14.5832	1	0	0
RBFOX2	NEO	1.05922	4.15839	1	1	0
ZBTB16	NEO	3.30525	0	1	1	1
PTCHD4	NEO	2.47895	0	1	1	1
FAM104A	NEO	1.06996	14.5832	1	0	0
ATXN3	NEO	1.052	4.15839	1	1	0
CDKN1C	NEO	1.38577	0	1	1	1
GPR146	NEO	1.34769	0.154253	1	1	0
CARD8	NEO	1.08112	3.15142	1	1	0
CTTNBP2	NEO	1.98097	0	1	1	1
EML1	NEO	1.14035	5.79082	1	0	0
ZFYVE9	NEO	1.10211	9.43789	1	0	0
SERPINE2	NEO	1.09359	14.5832	1	0	0
MDFIC	NEO	1.1182	0.154253	1	1	0
TEF	NEO	1.21739	4.15839	1	1	0
FOXP2	NEO	1.90812	0	1	1	1
HMCN1	NEO	1.36676	0	1	1	1
EEPD1	NEO	1.29224	0.154253	1	1	0
TMTC1	NEO	1.21474	3.15142	1	1	0
CXorf36	NEO	1.43101	1.02825	1	1	0
RARRES2	NEO	1.12451	0.0968565	1	1	0
CREBL2	NEO	1.08694	0.638584	1	1	0
LOC100507053	NEO	1.46218	2.29546	1	1	0
SHOX2	NEO	1.44139	0.264434	1	1	0
C10orf10	NEO	1.24746	0	1	1	1
TNFRSF10C	NEO	1.60559	2.29546	1	1	0
GIMAP7	NEO	1.13649	3.15142	1	1	0
NOVA1	NEO	1.50871	7.33284	1	0	0
GNG11	NEO	1.19026	0.264434	1	1	0
PLIN1	NEO	1.89797	0.0968565	1	1	0
GJC1	NEO	1.17358	11.7851	1	0	0
CELF2	NEO	1.74761	0	1	1	1
SATB1	NEO	1.10913	4.15839	1	1	0
NRP1	NEO	1.12049	1.02825	1	1	0
RASL11B	NEO	1.2423	5.79082	1	0	0
ZNF192	NEO	1.05346	11.7851	1	0	0
CD163	NEO	1.19922	0.154253	1	1	0
PELI2	NEO	1.28263	0	1	1	1
BDH2	NEO	1.08316	4.15839	1	1	0
ATF7	NEO	1.12286	11.7851	1	0	0
AHSA2	NEO	1.07641	4.15839	1	1	0
ZNF141	NEO	1.05791	7.33284	1	0	0
PTH1R	NEO	2.49599	0	1	1	1
SGMS2	NEO	1.10322	7.33284	1	0	0
LEPROT	NEO	1.06257	2.29546	1	1	0
WWTR1	NEO	1.075	14.5832	1	0	0
OSBPL1A	NEO	1.06589	2.29546	1	1	0
GHR	NEO	1.28984	9.43789	1	0	0
CLEC4C	NEO	1.9435	4.15839	1	1	0
ARHGAP28	NEO	1.37641	1.02825	1	1	0
PIAS1	NEO	1.05247	3.15142	1	1	0
KAT2B	NEO	1.14221	1.63399	1	1	0
ADHFE1	NEO	1.41969	9.43789	1	0	0
SORBS3	NEO	1.24008	0.264434	1	1	0
LOC401093	NEO	1.15755	9.43789	1	0	0
SVIL	NEO	1.11889	2.29546	1	1	0
APOBEC3C	NEO	1.10213	5.79082	1	0	0
NEO1	NEO	1.15217	1.63399	1	1	0
IFFO1	NEO	1.28686	0	1	1	1
RAPGEF3	NEO	1.64594	0.638584	1	1	0
FAM120B	NEO	1.05164	4.15839	1	1	0
LRCH3	NEO	1.03449	7.33284	1	0	0
LIMA1	NEO	1.06444	9.43789	1	0	0
ARL2BP	NEO	1.0621	2.29546	1	1	0
ARMC9	NEO	1.0734	11.7851	1	0	0
NAB1	NEO	1.0489	9.43789	1	0	0
ITIH5	NEO	1.41371	0	1	1	1
LRIG3	NEO	1.21918	0	1	1	1
PTX3	NEO	1.99728	4.15839	1	1	0
LEPROTL1	NEO	1.07192	7.33284	1	0	0
FGF14-AS2	NEO	1.3383	1.02825	1	1	0
CSAD	NEO	1.10953	5.79082	1	0	0
CCL14	NEO	2.27211	0	1	1	1
SSPN	NEO	1.22865	0.0968565	1	1	0
AQP1	NEO	1.22843	0	1	1	1
CRISPLD1	NEO	1.3434	0.154253	1	1	0
FLCN	NEO	1.11051	4.15839	1	1	0
LOX	NEO	1.13962	5.79082	1	0	0
RNF157	NEO	1.84211	5.79082	1	0	0
BNIP3L	NEO	1.06817	0.638584	1	1	0
RPLP2	NEO	1.03133	3.15142	1	1	0
MT1X	NEO	1.09897	7.33284	1	0	0
NDRG2	NEO	1.16538	1.63399	1	1	0
SBDSP1	NEO	1.10747	0.638584	1	1	0
FAM126A	NEO	1.11826	1.02825	1	1	0
SAV1	NEO	1.0707	2.29546	1	1	0
CTNND1	NEO	1.07463	9.43789	1	0	0
SCD5	NEO	1.36045	0.638584	1	1	0
THAP11	NEO	1.08418	2.29546	1	1	0
TIPARP	NEO	1.08381	2.29546	1	1	0
ACTA2	NEO	1.08059	7.33284	1	0	0
VIM	NEO	1.04237	1.63399	1	1	0
KLF13	NEO	1.09122	4.15839	1	1	0
FBLN7	NEO	1.45	0.154253	1	1	0
FNIP1	NEO	1.07023	0.0968565	1	1	0
SPAG9	NEO	1.04539	4.15839	1	1	0
CIR1	NEO	1.0481	4.15839	1	1	0
GCC2	NEO	1.04621	7.33284	1	0	0
CCDC69	NEO	1.22068	0.42581	1	1	0
RARB	NEO	1.19681	1.02825	1	1	0
MYLK	NEO	1.60825	0.42581	1	1	0
TRPC6	NEO	1.26115	4.15839	1	1	0
THSD7A	NEO	1.60544	0.264434	1	1	0
COL16A1	NEO	1.25512	0	1	1	1
FAM208A	NEO	1.0426	9.43789	1	0	0
CAMK1	NEO	1.13577	1.02825	1	1	0
PALMD	NEO	1.15998	1.63399	1	1	0
ZSCAN12	NEO	1.08965	9.43789	1	0	0
MAMDC2	NEO	1.50231	0.42581	1	1	0
ANKRD44	NEO	1.09432	11.7851	1	0	0
DEFB132	NEO	2.35914	3.15142	1	1	0
NR3C2	NEO	1.25551	1.02825	1	1	0
FAM21B	NEO	1.07098	3.15142	1	1	0
RNF180	NEO	1.23773	0.638584	1	1	0
CLIP4	NEO	1.1173	3.15142	1	1	0
PTPRD	NEO	1.33742	1.02825	1	1	0
PID1	NEO	1.71106	1.02825	1	1	0
TNFSF12	NEO	1.12432	0.264434	1	1	0
UBXN1	NEO	1.03272	7.33284	1	0	0
CALD1	NEO	1.08368	2.29546	1	1	0
ARL6IP5	NEO	1.07436	0.0968565	1	1	0
TWSG1	NEO	1.07298	1.02825	1	1	0
SFXN5	NEO	1.1086	9.43789	1	0	0
ZNF300P1	NEO	1.73745	0.638584	1	1	0
GOLGA7	NEO	1.04484	14.5832	1	0	0
NKIRAS1	NEO	1.08096	9.43789	1	0	0
CD248	NEO	1.24378	0	1	1	1
GXYLT2	NEO	1.47298	1.02825	1	1	0
HTR2A	NEO	3.16884	0	1	1	1
REV3L	NEO	1.08755	0.638584	1	1	0
STXBP5	NEO	1.07322	7.33284	1	0	0
MS4A7	NEO	1.09409	9.43789	1	0	0
CACNB4	NEO	1.2325	11.7851	1	0	0
RNF130	NEO	1.05312	0.638584	1	1	0
IRAK3	NEO	1.37871	0	1	1	1
MERTK	NEO	1.14519	0.638584	1	1	0
PKD2	NEO	1.14546	0.264434	1	1	0
FBXO42	NEO	1.05799	1.63399	1	1	0
NPR1	NEO	1.65939	0.42581	1	1	0
PPP4R1L	NEO	1.15568	4.15839	1	1	0
MXI1	NEO	1.07967	2.29546	1	1	0
MEDAG	NEO	1.75504	0	1	1	1
PCDHB7	NEO	1.25096	11.7851	1	0	0
SENP7	NEO	1.06789	5.79082	1	0	0
ENTPD3	NEO	1.44702	7.33284	1	0	0
PHKB	NEO	1.04007	11.7851	1	0	0
GNAQ	NEO	1.05521	5.79082	1	0	0
BICC1	NEO	1.25528	0	1	1	1
ST5	NEO	1.18319	4.15839	1	1	0
FNDC3A	NEO	1.11448	0	1	1	1
LINC00478	NEO	1.56428	0	1	1	1
C3	NEO	1.13347	1.02825	1	1	0
AMPD1	NEO	2.09527	1.02825	1	1	0
PCDH18	NEO	1.2181	0.0968565	1	1	0
TSC22D3	NEO	1.16836	0	1	1	1
TMEM14E	NEO	1.07476	14.5832	1	0	0
CYP7B1	NEO	1.13929	1.63399	1	1	0
SLC25A45	NEO	1.17172	2.29546	1	1	0
UFSP2	NEO	1.0718	9.43789	1	0	0
OR2A9P	NEO	1.23591	0	1	1	1
CDKN2C	NEO	1.11124	5.79082	1	0	0
S100A4	NEO	1.10069	0.638584	1	1	0
TTYH2	NEO	1.14993	7.33284	1	0	0
WBP1L	NEO	1.07681	0.154253	1	1	0
OSBPL9	NEO	1.05795	2.29546	1	1	0
VHL	NEO	1.05457	14.5832	1	0	0
HLA-E	NEO	1.06379	4.15839	1	1	0
EBF1	NEO	1.44117	0	1	1	1
PLCD1	NEO	1.15875	3.15142	1	1	0
RASAL2	NEO	1.09017	3.15142	1	1	0
SERINC3	NEO	1.04955	5.79082	1	0	0
CILP	NEO	1.28738	1.63399	1	1	0
TMEM119	NEO	1.45836	0	1	1	1
C3orf18	NEO	1.1786	2.29546	1	1	0
INPP5B	NEO	1.0691	5.79082	1	0	0
FKBP7	NEO	1.19737	0.264434	1	1	0
LPL	NEO	1.37967	0	1	1	1
FLNC	NEO	1.76734	0	1	1	1
FTO	NEO	1.10361	0	1	1	1
PREX2	NEO	1.47461	0.638584	1	1	0
BASP1	NEO	1.17369	5.79082	1	0	0
DNAJC8	NEO	1.02529	14.5832	1	0	0
BTD	NEO	1.06543	9.43789	1	0	0
STAT6	NEO	1.04932	11.7851	1	0	0
FBLN5	NEO	1.17493	0.264434	1	1	0
SPON1	NEO	1.39125	0	1	1	1
LHFPL2	NEO	1.18472	0.42581	1	1	0
IFITM2	NEO	1.07657	3.15142	1	1	0
SAMD4A	NEO	1.19482	5.79082	1	0	0
CEP85L	NEO	1.15004	1.63399	1	1	0
43715	NEO	1.03743	5.79082	1	0	0
HOXD9	NEO	1.55211	1.02825	1	1	0
PECAM1	NEO	1.27252	14.5832	1	0	0
FOXO1	NEO	1.26903	0	1	1	1
HPD	NEO	2.63654	2.29546	1	1	0
GLT8D2	NEO	1.26281	0.0968565	1	1	0
PDGFA	NEO	1.129	7.33284	1	0	0
CACHD1	NEO	1.21411	7.33284	1	0	0
PARP15	NEO	1.15682	14.5832	1	0	0
NOD1	NEO	1.08804	5.79082	1	0	0
RAMP3	NEO	1.21678	1.02825	1	1	0
KLRK1	NEO	1.18528	4.15839	1	1	0
STARD13	NEO	1.10848	4.15839	1	1	0
AGPS	NEO	1.05849	7.33284	1	0	0
TINAGL1	NEO	1.14759	3.15142	1	1	0
CDH6	NEO	1.38458	1.63399	1	1	0
KIAA1377	NEO	1.31053	0.638584	1	1	0
COL3A1	NEO	1.09612	0.638584	1	1	0
COL21A1	NEO	1.77834	0.0968565	1	1	0
C11orf70	NEO	1.31336	11.7851	1	0	0
AVPI1	NEO	1.17525	7.33284	1	0	0
SESN3	NEO	1.1989	0	1	1	1
FAM228B	NEO	1.24276	11.7851	1	0	0
ALKBH8	NEO	1.10159	3.15142	1	1	0
CARD6	NEO	1.14099	9.43789	1	0	0
CFP	NEO	1.48073	1.63399	1	1	0
TSPYL2	NEO	1.19707	0	1	1	1
GNAL	NEO	1.51911	2.29546	1	1	0
FOLR2	NEO	1.47928	0	1	1	1
SNX9	NEO	1.18747	3.15142	1	1	0
MIR143HG	NEO	1.2273	3.15142	1	1	0
SAT2	NEO	1.10418	1.02825	1	1	0
DZIP1	NEO	1.19548	0.42581	1	1	0
CPED1	NEO	1.20477	0.264434	1	1	0
METTL7A	NEO	1.25857	0	1	1	1
NPHP3	NEO	1.10775	0.264434	1	1	0
RFT1	NEO	1.04397	9.43789	1	0	0
BNC2	NEO	1.46449	0	1	1	1
SH3BGRL2	NEO	1.26704	0.154253	1	1	0
NBPF11	NEO	1.08659	9.43789	1	0	0
SLC18B1	NEO	1.0925	7.33284	1	0	0
ADD1	NEO	1.06969	9.43789	1	0	0
USP17L2	NEO	1.73638	1.63399	1	1	0
PLXNA2	NEO	1.22625	1.02825	1	1	0
PAR-SN	NEO	1.23436	14.5832	1	0	0
CLEC10A	NEO	1.60883	2.29546	1	1	0
CLEC2B	NEO	1.09233	1.02825	1	1	0
TBC1D13	NEO	1.07579	5.79082	1	0	0
CLN8	NEO	1.07621	11.7851	1	0	0
PRRX1	NEO	1.16604	14.5832	1	0	0
TRIM5	NEO	1.0891	3.15142	1	1	0
MEIS2	NEO	1.35327	0	1	1	1
PARVA	NEO	1.09485	9.43789	1	0	0
MBP	NEO	1.10884	11.7851	1	0	0
SIK2	NEO	1.08739	5.79082	1	0	0
SRSF5	NEO	1.04882	0.42581	1	1	0
MAP7D3	NEO	1.20701	1.63399	1	1	0
RNF13	NEO	1.03697	9.43789	1	0	0
LETMD1	NEO	1.08851	0.42581	1	1	0
HSPA12B	NEO	1.52406	0	1	1	1
GABPA	NEO	1.04403	7.33284	1	0	0
ENPP2	NEO	1.21167	0	1	1	1
DENND5A	NEO	1.04472	9.43789	1	0	0
TPST1	NEO	1.18189	0	1	1	1
PCNXL4	NEO	1.04789	7.33284	1	0	0
FGD4	NEO	1.14132	0.0968565	1	1	0
FHOD3	NEO	1.35998	0.42581	1	1	0
IFI16	NEO	1.07585	1.63399	1	1	0
GLI3	NEO	1.16294	2.29546	1	1	0
RGS5	NEO	1.16666	0.154253	1	1	0
CHM	NEO	1.05622	7.33284	1	0	0
EZH1	NEO	1.12104	0.264434	1	1	0
SPATS2L	NEO	1.0732	9.43789	1	0	0
ALOX15B	NEO	1.5193	11.7851	1	0	0
FMO4	NEO	1.19535	11.7851	1	0	0
ZNF846	NEO	1.13118	2.29546	1	1	0
ZNF441	NEO	1.15264	0.638584	1	1	0
ZCCHC4	NEO	1.078	4.15839	1	1	0
CPXM2	NEO	1.12731	5.79082	1	0	0
CDK15	NEO	1.95088	0.0968565	1	1	0
YPEL2	NEO	1.2691	9.43789	1	0	0
STARD8	NEO	1.3522	0.42581	1	1	0
FOSB	NEO	3.11176	4.15839	1	1	0
CLIP3	NEO	1.26884	0.264434	1	1	0
ARHGEF4	NEO	1.76342	1.02825	1	1	0
GLT8D1	NEO	1.07538	0.0968565	1	1	0
CDIPT	NEO	1.04536	5.79082	1	0	0
WHAMMP1	NEO	1.06963	5.79082	1	0	0
SKAP2	NEO	1.09248	5.79082	1	0	0
RHOJ	NEO	1.23436	0.42581	1	1	0
TMEM100	NEO	1.76375	1.63399	1	1	0
DYNC1LI2	NEO	1.08521	5.79082	1	0	0
N4BP2L1	NEO	1.10291	11.7851	1	0	0
ACACB	NEO	1.47667	0	1	1	1
AUTS2	NEO	1.1785	4.15839	1	1	0
LIX1L	NEO	1.15444	0	1	1	1
LGMN	NEO	1.05182	11.7851	1	0	0
NOTCH2NL	NEO	1.05944	0.264434	1	1	0
SYN2	NEO	3.34316	0.264434	1	1	0
GIMAP6	NEO	1.15404	0.42581	1	1	0
CTSO	NEO	1.11987	1.02825	1	1	0
COL5A1	NEO	1.15255	5.79082	1	0	0
ASB8	NEO	1.0781	1.63399	1	1	0
MYOM1	NEO	1.86958	0	1	1	1
SCN4B	NEO	1.74488	0.42581	1	1	0
SDK1	NEO	1.23238	9.43789	1	0	0
DPYSL3	NEO	1.09868	4.15839	1	1	0
TRAPPC12	NEO	1.0452	7.33284	1	0	0
TACC1	NEO	1.15753	0	1	1	1
CA11	NEO	1.21242	0.638584	1	1	0
FKBP9	NEO	1.07409	4.15839	1	1	0
ZNF132	NEO	1.34549	0.638584	1	1	0
NAP1L3	NEO	1.57981	0.154253	1	1	0
LGI4	NEO	3.66308	0	1	1	1
TTC14	NEO	1.04586	11.7851	1	0	0
TK2	NEO	1.16239	0	1	1	1
ENPEP	NEO	1.1551	1.63399	1	1	0
HAND2	NEO	1.79889	0.154253	1	1	0
VWF	NEO	1.51962	0.264434	1	1	0
FGL2	NEO	1.08553	14.5832	1	0	0
CWF19L2	NEO	1.06057	4.15839	1	1	0
MT1A	NEO	1.51794	5.79082	1	0	0
SBDS	NEO	1.03446	11.7851	1	0	0
NRDE2	NEO	1.0443	14.5832	1	0	0
RASA3	NEO	1.09445	4.15839	1	1	0
CAV1	NEO	1.78117	0.638584	1	1	0
ACSL1	NEO	1.1894	0	1	1	1
P2RY1	NEO	1.53658	0	1	1	1
AKTIP	NEO	1.08078	1.63399	1	1	0
FYCO1	NEO	1.06656	5.79082	1	0	0
PPARA	NEO	1.15215	4.15839	1	1	0
STAB1	NEO	1.17585	0.264434	1	1	0
CA1	NEO	24.5456	0	1	1	1
NR1D2	NEO	1.0849	2.29546	1	1	0
PPAP2B	NEO	1.15685	0	1	1	1
C16orf89	NEO	1.70383	0.638584	1	1	0
MXRA7	NEO	1.12283	11.7851	1	0	0
CPA3	NEO	1.40886	0	1	1	1
HELQ	NEO	1.09684	9.43789	1	0	0
SWAP70	NEO	1.04476	11.7851	1	0	0
TBCEL	NEO	1.07248	9.43789	1	0	0
LOC283070	NEO	1.0937	7.33284	1	0	0
LOC100127983	NEO	1.45957	2.29546	1	1	0
PCDHB4	NEO	1.30632	7.33284	1	0	0
PCDHB12	NEO	1.37566	1.63399	1	1	0
RNASEL	NEO	1.07239	7.33284	1	0	0
NNAT	NEO	5.46859	0.154253	1	1	0
KCTD18	NEO	1.07879	0.264434	1	1	0
OR2A20P	NEO	1.19719	0.0968565	1	1	0
KRT14	NEO	1.25443	7.33284	1	0	0
ZMYM6NB	NEO	1.05849	7.33284	1	0	0
ARHGAP31	NEO	1.10501	3.15142	1	1	0
GRASP	NEO	1.30185	0	1	1	1
DDX17	NEO	1.03954	9.43789	1	0	0
LEPREL2	NEO	1.23174	0.638584	1	1	0
ERAP1	NEO	1.05896	9.43789	1	0	0
GABARAPL1	NEO	1.07912	3.15142	1	1	0
TNXA	NEO	4.72494	0.42581	1	1	0
TPCN1	NEO	1.09561	14.5832	1	0	0
LIMS2	NEO	1.24144	4.15839	1	1	0
ROBO4	NEO	1.45142	5.79082	1	0	0
WIPF1	NEO	1.08489	11.7851	1	0	0
CD33	NEO	1.17669	3.15142	1	1	0
ZNF154	NEO	1.14346	9.43789	1	0	0
ZNF354C	NEO	1.10338	7.33284	1	0	0
MT1L	NEO	1.26189	2.29546	1	1	0
CDO1	NEO	1.71579	0	1	1	1
RGCC	NEO	1.09896	1.63399	1	1	0
STRADB	NEO	1.08798	7.33284	1	0	0
GJA1	NEO	1.09656	3.15142	1	1	0
RBP7	NEO	1.20539	2.29546	1	1	0
TSPAN3	NEO	1.04394	5.79082	1	0	0
F13A1	NEO	1.18766	1.02825	1	1	0
SAA1	NEO	1.18074	9.43789	1	0	0
DKK3	NEO	1.20508	0.638584	1	1	0
ID4	NEO	1.2301	7.33284	1	0	0
LOC100270804	NEO	1.24728	0.264434	1	1	0
EMP1	NEO	1.07244	14.5832	1	0	0
CALCRL	NEO	1.17531	3.15142	1	1	0
NCAM1	NEO	1.49805	3.15142	1	1	0
PDE7B	NEO	1.95799	0	1	1	1
SLC18A2	NEO	1.99883	0.264434	1	1	0
PFKFB1	NEO	2.46971	0.42581	1	1	0
NUMB	NEO	1.04599	2.29546	1	1	0
KERA	NEO	2.12444	0.0968565	1	1	0
ZNF187	NEO	1.0719	4.15839	1	1	0
EBF2	NEO	2.21105	0	1	1	1
CXCL12	NEO	1.24886	0	1	1	1
FER	NEO	1.08333	5.79082	1	0	0
PLEKHM3	NEO	1.14134	0.42581	1	1	0
ACPL2	NEO	1.09743	2.29546	1	1	0
NFATC3	NEO	1.09622	2.29546	1	1	0
IGSF10	NEO	1.54532	0.154253	1	1	0
SHISA4	NEO	1.12562	9.43789	1	0	0
SPARCL1	NEO	1.20955	0	1	1	1
CFD	NEO	1.22697	3.15142	1	1	0
FKBP14	NEO	1.09471	2.29546	1	1	0
RRN3P1	NEO	1.24414	0.154253	1	1	0
TMEM133	NEO	1.18225	4.15839	1	1	0
MN1	NEO	2.25549	0.42581	1	1	0
KLB	NEO	3.43147	1.63399	1	1	0
C2orf40	NEO	2.21818	0	1	1	1
MSRB3	NEO	1.19965	1.63399	1	1	0
GLTSCR2	NEO	1.06068	2.29546	1	1	0
SHC3	NEO	1.84822	3.15142	1	1	0
LRRK2	NEO	1.14961	4.15839	1	1	0
PRKACB	NEO	1.10266	5.79082	1	0	0
COLEC12	NEO	1.17532	0	1	1	1
MT1M	NEO	1.34421	1.63399	1	1	0
PRCP	NEO	1.06232	1.63399	1	1	0
RELN	NEO	2.30183	3.15142	1	1	0
TPRG1	NEO	1.17751	11.7851	1	0	0
ELTD1	NEO	1.16228	0.638584	1	1	0
FAM171B	NEO	1.16028	4.15839	1	1	0
ITGBL1	NEO	1.14475	7.33284	1	0	0
NXF1	NEO	1.05923	14.5832	1	0	0
ZCCHC16	NEO	1.46315	1.02825	1	1	0
DCAF5	NEO	1.06595	11.7851	1	0	0
SCG5	NEO	1.34337	0.0968565	1	1	0
NGFR	NEO	1.43515	11.7851	1	0	0
ANXA5	NEO	1.04636	1.63399	1	1	0
RNF216	NEO	1.05232	3.15142	1	1	0
PRKAR2B	NEO	1.13005	1.02825	1	1	0
SMAP2	NEO	1.1643	0.0968565	1	1	0
PAMR1	NEO	1.54871	0.264434	1	1	0
APCDD1	NEO	1.15489	5.79082	1	0	0
SACS	NEO	1.07498	14.5832	1	0	0
BMPER	NEO	2.98399	0	1	1	1
SGCB	NEO	1.05907	11.7851	1	0	0
KIAA0408	NEO	2.65144	0	1	1	1
HYAL1	NEO	2.18493	2.29546	1	1	0
SETDB2	NEO	1.09221	1.02825	1	1	0
LGI2	NEO	1.28181	14.5832	1	0	0
SYF2	NEO	1.0434	3.15142	1	1	0
HOXC8	NEO	1.34583	0	1	1	1
UACA	NEO	1.07888	2.29546	1	1	0
LOC653501	NEO	1.11087	1.63399	1	1	0
CLEC1A	NEO	1.53393	0	1	1	1
CNRIP1	NEO	1.26742	0	1	1	1
IGFBP5	NEO	1.09199	9.43789	1	0	0
ZNF330	NEO	1.04569	5.79082	1	0	0
LURAP1	NEO	1.65343	0	1	1	1
ENTPD1	NEO	1.07589	9.43789	1	0	0
MAP3K12	NEO	1.18144	0.264434	1	1	0
HEXA	NEO	1.14173	1.02825	1	1	0
PPBP	NEO	2.4406	0.154253	1	1	0
PTPLAD2	NEO	1.12691	3.15142	1	1	0
UROD	NEO	1.06619	4.15839	1	1	0
SLC1A3	NEO	1.09178	11.7851	1	0	0
NEGR1	NEO	1.54548	0	1	1	1
CHST7	NEO	1.36506	0	1	1	1
P4HA3	NEO	1.42734	0.0968565	1	1	0
NT5E	NEO	1.13027	9.43789	1	0	0
NRN1	NEO	1.2776	0.154253	1	1	0
[truncated: 4,250 more rows]

## Sheet: Supplementary Table 2
Differentiall expressed genes between R/NR in NEO and I-SPY pre-treatment and on treatment using p-values
Gene.Name	Dataset	Time	Score	Fold.Change	q.value	p<0.05	p<0.01	p<0.001
CDR2L	NEO	TP	2.11498	1.37476	44.366	1	1	0
CLIC3	NEO	TP	2.14416	1.7046	44.366	1	1	0
KMO	NEO	TP	1.99942	1.3606	44.366	1	0	0
CCL7	NEO	TP	1.84224	2.3078	48.131	1	0	0
UQCRHL	NEO	TP	2.11351	1.13087	44.366	1	0	0
GPR171	NEO	TP	1.93848	1.92316	44.366	1	1	0
CHAF1A	NEO	TP	2.61549	1.22832	30.4238	1	1	1
CCDC137	NEO	TP	2.04393	1.22238	44.366	1	1	0
RAD23B	NEO	TP	1.84879	1.0483	48.131	1	0	0
AFMID	NEO	TP	2.7448	1.53065	28.5306	1	1	1
GMNN	NEO	TP	2.10474	1.22469	44.366	1	1	0
MRPL12	NEO	TP	1.82025	1.11664	48.131	1	0	0
BRCA2	NEO	TP	1.84068	1.17899	48.131	1	0	0
BSG	NEO	TP	1.66713	1.06974	48.131	1	0	0
MATK	NEO	TP	2.53472	1.57622	30.4238	1	1	1
ACTL8	NEO	TP	2.37309	3.64684	36.4356	1	1	1
HERC5	NEO	TP	1.75564	1.14428	48.131	1	0	0
ASUN	NEO	TP	1.96713	1.08236	44.366	1	1	0
ZDHHC12	NEO	TP	1.70148	1.11636	48.131	1	0	0
KIF15	NEO	TP	2.06289	1.27251	44.366	1	1	0
TXN	NEO	TP	2.55549	1.07275	30.4238	1	1	1
PGAM5	NEO	TP	2.05263	1.0901	44.366	1	1	0
CTH	NEO	TP	1.99314	1.44363	44.366	1	1	0
ARHGAP11B	NEO	TP	1.88247	1.24475	48.131	1	0	0
NCAPH	NEO	TP	2.20308	1.70996	44.366	1	1	0
LPCAT4	NEO	TP	1.87328	1.12683	48.131	1	0	0
CNOT10	NEO	TP	1.68628	1.09605	48.131	1	0	0
DNAJA1	NEO	TP	2.20821	1.04642	44.366	1	1	0
MCM6	NEO	TP	2.40477	1.09116	36.4356	1	1	1
STARD4	NEO	TP	1.64532	1.17097	48.131	1	0	0
DCLRE1C	NEO	TP	1.70787	1.07517	48.131	1	0	0
SURF6	NEO	TP	3.37141	1.07715	9.82436	1	0	0
NOL11	NEO	TP	1.8218	1.06085	48.131	1	0	0
SMARCD2	NEO	TP	1.76337	1.07059	48.131	1	0	0
UPF3B	NEO	TP	1.78118	1.08994	48.131	1	0	0
CAMSAP1	NEO	TP	1.77659	1.11301	48.131	1	0	0
FOXK2	NEO	TP	1.64685	1.18414	48.131	1	0	0
XAF1	NEO	TP	1.73133	1.12781	48.131	1	0	0
DSN1	NEO	TP	1.91536	1.07957	44.366	1	1	0
APOBEC3A	NEO	TP	2.22997	2.75567	40.5786	1	1	0
TRPM4	NEO	TP	1.7168	1.4316	48.131	1	0	0
MRPL36	NEO	TP	2.546	1.0872	30.4238	1	1	1
A2ML1	NEO	TP	2.24471	2.63525	40.5786	1	1	0
ASS1	NEO	TP	1.81123	1.13261	48.131	1	0	0
DNAJC22	NEO	TP	1.86772	1.8911	48.131	1	0	0
C6orf203	NEO	TP	1.78554	1.09207	48.131	1	0	0
BORA	NEO	TP	2.17145	1.22293	44.366	1	1	0
SURF1	NEO	TP	1.88156	1.15679	48.131	1	0	0
NOP58	NEO	TP	1.92865	1.04612	44.366	1	1	0
FFAR2	NEO	TP	1.95683	2.49936	44.366	1	1	0
SHMT2	NEO	TP	1.80886	1.091	48.131	1	0	0
LPIN1	NEO	TP	1.7419	1.24441	48.131	1	0	0
RAD54B	NEO	TP	1.78282	1.18499	48.131	1	0	0
RNASEH1	NEO	TP	1.78117	1.0733	48.131	1	0	0
TRIB3	NEO	TP	1.76381	1.19544	48.131	1	0	0
GEMIN7	NEO	TP	1.80782	1.15898	48.131	1	0	0
ALG12	NEO	TP	1.67748	1.15883	48.131	1	0	0
PPHLN1	NEO	TP	1.78938	1.08695	48.131	1	0	0
TDP1	NEO	TP	1.97367	1.10127	44.366	1	0	0
LAD1	NEO	TP	1.89095	1.23301	44.366	1	1	0
NEK2	NEO	TP	3.00372	1.37121	21.6955	1	1	1
C17orf96	NEO	TP	3.3152	3.53082	13.9609	1	1	1
PECAM1	NEO	TP	2.06304	1.58644	44.366	1	1	0
POLG2	NEO	TP	1.88815	1.11215	48.131	1	0	0
GPR157	NEO	TP	1.8985	1.37306	44.366	1	0	0
FUCA2	NEO	TP	1.89667	1.06994	44.366	1	1	0
UQCRFS1	NEO	TP	2.69598	1.10008	28.5306	1	1	1
SAMD9L	NEO	TP	1.75554	1.14798	48.131	1	0	0
SNHG12	NEO	TP	1.71914	1.10174	48.131	1	0	0
ZIC2	NEO	TP	3.02688	22.4917	21.6955	1	1	1
PGAP3	NEO	TP	2.42888	1.28464	36.4356	1	1	1
CCNE2	NEO	TP	2.52736	1.4818	30.4238	1	1	1
DSCC1	NEO	TP	1.7743	1.3898	48.131	1	0	0
SP140	NEO	TP	1.73114	1.94873	48.131	1	0	0
MAN1B1	NEO	TP	1.98058	1.22712	44.366	1	1	0
ACSL1	NEO	TP	1.70019	1.11943	48.131	1	0	0
SAP30BP	NEO	TP	1.73069	1.05193	48.131	1	0	0
C15orf23	NEO	TP	2.3916	1.16364	36.4356	1	1	1
EXO1	NEO	TP	2.78047	1.58106	28.5306	1	1	1
GGT1	NEO	TP	1.87511	1.50804	48.131	1	0	0
C11orf82	NEO	TP	2.8954	1.41921	26.3501	1	1	1
PTP4A3	NEO	TP	1.74327	1.32164	48.131	1	0	0
B4GALT3	NEO	TP	2.59337	1.11648	30.4238	1	1	1
SFXN4	NEO	TP	2.12046	1.10352	44.366	1	1	0
DOT1L	NEO	TP	2.1419	1.25807	44.366	1	1	0
DTL	NEO	TP	1.87536	1.20216	48.131	1	0	0
POLQ	NEO	TP	2.31744	1.37914	36.4356	1	1	1
UQCRB	NEO	TP	2.24838	1.08125	40.5786	1	1	0
LOC100129250	NEO	TP	1.81497	1.2282	48.131	1	0	0
PIDD	NEO	TP	2.07253	1.38545	44.366	1	0	0
SLC25A19	NEO	TP	2.96727	1.17641	24.4853	1	1	1
IMPA2	NEO	TP	1.66578	1.23417	48.131	1	0	0
G6PD	NEO	TP	2.68859	1.20363	28.5306	1	1	1
RAD51	NEO	TP	2.07532	1.29607	44.366	1	1	0
CACYBP	NEO	TP	1.8752	1.07056	48.131	1	0	0
PGAM1	NEO	TP	1.89654	1.04181	44.366	1	1	0
ACER3	NEO	TP	1.84128	1.19715	48.131	1	0	0
GALK2	NEO	TP	1.77706	1.08939	48.131	1	0	0
PLIN2	NEO	TP	1.74439	1.08528	48.131	1	0	0
SOX18	NEO	TP	1.71796	1.52289	48.131	1	0	0
FANCD2	NEO	TP	1.70323	1.11882	48.131	1	0	0
CKS1B	NEO	TP	1.99806	1.09355	44.366	1	0	0
HDAC2	NEO	TP	2.21999	1.07698	40.5786	1	1	0
LOC728743	NEO	TP	1.67351	1.19022	48.131	1	0	0
MIEN1	NEO	TP	2.5409	1.20277	30.4238	1	1	1
PFKP	NEO	TP	1.93013	1.28887	44.366	1	1	0
HIST1H2AK	NEO	TP	1.69622	1.11691	48.131	1	0	0
ORC6	NEO	TP	1.77271	1.26239	48.131	1	0	0
JTB	NEO	TP	1.8647	1.03758	48.131	1	0	0
ZDHHC11	NEO	TP	1.74301	1.65745	48.131	1	0	0
H2AFZ	NEO	TP	2.19128	1.062	44.366	1	0	0
CD7	NEO	TP	1.72109	1.52666	48.131	1	0	0
CBX2	NEO	TP	2.43053	1.60962	36.4356	1	1	1
SLC22A23	NEO	TP	1.91038	1.22918	44.366	1	1	0
FBXO5	NEO	TP	1.79858	1.12993	48.131	1	0	0
CDC123	NEO	TP	1.83544	1.03427	48.131	1	0	0
FNIP2	NEO	TP	1.73489	1.05738	48.131	1	0	0
PSMD12	NEO	TP	2.42054	1.08875	36.4356	1	1	1
RNF166	NEO	TP	1.82632	1.20256	48.131	1	0	0
GLRX2	NEO	TP	2.09091	1.08966	44.366	1	1	0
ARHGEF39	NEO	TP	1.84642	1.54413	48.131	1	0	0
C10orf47	NEO	TP	1.64654	1.25955	48.131	1	0	0
HIST1H2AD	NEO	TP	1.73851	1.14031	48.131	1	0	0
CKAP2	NEO	TP	1.9396	1.12	44.366	1	0	0
CEP78	NEO	TP	1.70535	1.07563	48.131	1	0	0
DUSP10	NEO	TP	2.40711	1.15046	36.4356	1	1	1
TOP2A	NEO	TP	2.08251	1.19003	44.366	1	0	0
CXADRP2	NEO	TP	1.92778	7.19734	44.366	1	1	0
TBX21	NEO	TP	1.93534	2.07515	44.366	1	1	0
OXCT1	NEO	TP	1.64585	1.10094	48.131	1	0	0
CASP14	NEO	TP	2.14884	2.65533	44.366	1	1	0
OSGEP	NEO	TP	2.90628	1.11609	26.3501	1	1	1
ANKRD22	NEO	TP	1.92614	1.2402	44.366	1	1	0
MED24	NEO	TP	2.05769	1.18207	44.366	1	1	0
POLR1B	NEO	TP	1.78802	1.08518	48.131	1	0	0
LINC00338	NEO	TP	2.07281	1.27166	44.366	1	1	0
WDR76	NEO	TP	2.36169	1.16295	36.4356	1	1	1
GART	NEO	TP	2.31458	1.07045	40.5786	1	1	0
DDX58	NEO	TP	1.83122	1.07013	48.131	1	0	0
C14orf159	NEO	TP	1.67318	1.46137	48.131	1	0	0
CLP1	NEO	TP	1.87551	1.09756	48.131	1	0	0
RAD18	NEO	TP	2.26178	1.20142	40.5786	1	1	0
SQRDL	NEO	TP	1.77455	1.08173	48.131	1	0	0
CNP	NEO	TP	1.88195	1.09419	48.131	1	0	0
EPN2	NEO	TP	1.93328	1.09302	44.366	1	1	0
SEPHS1	NEO	TP	1.65878	1.03932	48.131	1	0	0
FASTKD1	NEO	TP	1.77065	1.12489	48.131	1	0	0
TRIP13	NEO	TP	2.13007	1.24501	44.366	1	1	0
ZUFSP	NEO	TP	1.99013	1.11192	44.366	1	1	0
GZMB	NEO	TP	2.21763	1.53165	40.5786	1	1	0
DEGS1	NEO	TP	2.23648	1.08423	40.5786	1	1	0
FKBP11	NEO	TP	1.76662	1.13507	48.131	1	0	0
BAZ1A	NEO	TP	1.64656	1.06527	48.131	1	0	0
PRPF3	NEO	TP	2.01521	1.44781	44.366	1	1	0
HHIPL2	NEO	TP	3.15621	4.4438	16.0762	1	1	1
CDC25C	NEO	TP	2.51112	1.69997	30.4238	1	1	1
IDH2	NEO	TP	2.00859	1.08392	44.366	1	1	0
NUSAP1	NEO	TP	2.12591	1.16919	44.366	1	1	0
LDLRAP1	NEO	TP	1.65362	1.07287	48.131	1	0	0
USP20	NEO	TP	1.86573	1.09783	48.131	1	0	0
XRCC2	NEO	TP	1.87699	1.24722	48.131	1	0	0
LIG1	NEO	TP	1.95443	1.09202	44.366	1	1	0
FAM83G	NEO	TP	1.68124	1.26771	48.131	1	0	0
PRPF31	NEO	TP	1.67139	1.06777	48.131	1	0	0
KIAA1958	NEO	TP	1.9446	1.46016	44.366	1	1	0
TMEM138	NEO	TP	1.68374	1.05469	48.131	1	0	0
RNMTL1	NEO	TP	1.69641	1.12004	48.131	1	0	0
NOD1	NEO	TP	1.74653	1.09319	48.131	1	0	0
SAPCD2	NEO	TP	2.9199	1.95737	26.3501	1	1	1
DLEU1	NEO	TP	1.67079	1.2252	48.131	1	0	0
UPF2	NEO	TP	1.64916	1.04603	48.131	1	0	0
VTA1	NEO	TP	1.65078	1.06377	48.131	1	0	0
GTF3C4	NEO	TP	2.14799	1.0751	44.366	1	0	0
ZNF551	NEO	TP	2.59548	1.38252	30.4238	1	1	1
ORC2	NEO	TP	1.87514	1.11785	48.131	1	0	0
CHAC1	NEO	TP	2.31669	2.0098	40.5786	1	1	0
SLC15A2	NEO	TP	1.67381	1.40848	48.131	1	0	0
CBR3	NEO	TP	2.1975	1.3477	44.366	1	1	0
CENPH	NEO	TP	2.1704	1.48259	44.366	1	1	0
QSOX2	NEO	TP	1.84272	1.32029	48.131	1	0	0
ZNF296	NEO	TP	1.84845	1.54551	48.131	1	0	0
PITPNC1	NEO	TP	2.62763	1.13111	30.4238	1	1	1
SMC2	NEO	TP	2.13427	1.136	44.366	1	1	0
CCR2	NEO	TP	2.00201	1.33859	44.366	1	1	0
UBE2S	NEO	TP	2.38124	1.14206	36.4356	1	1	1
TSEN34	NEO	TP	1.95675	1.08882	44.366	1	0	0
CD300E	NEO	TP	1.71481	2.59789	48.131	1	0	0
PGBD2	NEO	TP	1.76604	1.14596	48.131	1	0	0
AUNIP	NEO	TP	1.80224	1.39322	48.131	1	0	0
NR4A3	NEO	TP	2.02116	1.70441	44.366	1	1	0
QRSL1	NEO	TP	3.49726	1.20502	6.80148	1	0	0
HINFP	NEO	TP	1.65296	1.07089	48.131	1	0	0
S100A12	NEO	TP	1.67825	2.36115	48.131	1	0	0
LMAN2	NEO	TP	1.95583	1.05365	44.366	1	1	0
CCT8	NEO	TP	2.21686	1.05135	40.5786	1	1	0
MMS22L	NEO	TP	1.74315	1.16846	48.131	1	0	0
MCM10	NEO	TP	2.13081	1.32899	44.366	1	1	0
LTV1	NEO	TP	2.60796	1.10841	30.4238	1	1	1
SPC25	NEO	TP	1.7197	1.27269	48.131	1	0	0
BIRC5	NEO	TP	1.95094	1.2597	44.366	1	1	0
EVPL	NEO	TP	1.66613	1.2637	48.131	1	0	0
HIST1H4H	NEO	TP	2.07073	1.06686	44.366	1	1	0
MRPL37	NEO	TP	2.08571	1.07153	44.366	1	0	0
GGCT	NEO	TP	2.29212	1.11881	40.5786	1	1	0
EXOSC2	NEO	TP	3.43765	1.11085	6.80148	1	0	0
PPID	NEO	TP	1.6826	1.0369	48.131	1	0	0
FAM72A	NEO	TP	2.22838	1.45118	40.5786	1	1	0
LMNB1	NEO	TP	2.6694	1.20751	28.5306	1	1	1
MRPS25	NEO	TP	3.78069	1.25776	6.80148	1	0	0
OTUD6B	NEO	TP	1.84242	1.09361	48.131	1	0	0
FAM98A	NEO	TP	1.9166	1.04689	44.366	1	1	0
SLFN5	NEO	TP	1.66552	1.07883	48.131	1	0	0
USP18	NEO	TP	2.30108	1.18026	40.5786	1	1	0
MCM2	NEO	TP	1.79773	1.2918	48.131	1	0	0
CHKA	NEO	TP	1.74835	1.22859	48.131	1	0	0
NDOR1	NEO	TP	1.68232	1.61875	48.131	1	0	0
CORO7	NEO	TP	1.7651	1.38032	48.131	1	0	0
TCF3	NEO	TP	3.22758	1.16424	16.0762	1	1	1
DLL4	NEO	TP	1.64803	1.25121	48.131	1	0	0
CSAG3	NEO	TP	1.91104	5.61551	44.366	1	1	0
GDPD1	NEO	TP	2.12386	1.20202	44.366	1	1	0
SNORA43	NEO	TP	1.97192	1.07757	44.366	1	0	0
ZNF367	NEO	TP	1.91355	1.22481	44.366	1	1	0
BRIX1	NEO	TP	2.16225	1.06459	44.366	1	1	0
HIST1H2AB	NEO	TP	1.72209	1.16898	48.131	1	0	0
FER1L4	NEO	TP	1.70705	1.93202	48.131	1	0	0
PPA1	NEO	TP	3.3636	1.08181	9.82436	1	0	0
TOMM22	NEO	TP	1.73236	1.03708	48.131	1	0	0
FANCE	NEO	TP	1.92167	1.53762	44.366	1	1	0
SETMAR	NEO	TP	2.17024	1.39395	44.366	1	1	0
TONSL	NEO	TP	1.82104	1.39992	48.131	1	0	0
MASTL	NEO	TP	2.45005	1.1072	30.4238	1	1	1
CD38	NEO	TP	1.88103	1.34099	48.131	1	0	0
DEPDC1	NEO	TP	2.65586	1.4783	30.4238	1	1	1
STEAP3	NEO	TP	1.86737	1.19113	48.131	1	0	0
GTF3C5	NEO	TP	2.41938	1.14001	36.4356	1	1	1
RAD54L	NEO	TP	1.83743	1.55528	48.131	1	0	0
RAD1	NEO	TP	2.04069	1.08098	44.366	1	0	0
PDK1	NEO	TP	1.68605	1.14874	48.131	1	0	0
PSPH	NEO	TP	2.94016	1.20189	24.4853	1	1	1
MRPS2	NEO	TP	3.53443	1.14636	6.80148	1	0	0
KIAA0907	NEO	TP	1.64924	1.0729	48.131	1	0	0
MED17	NEO	TP	2.35531	1.07823	36.4356	1	1	1
TTK	NEO	TP	1.8216	1.25156	48.131	1	0	0
LOC220906	NEO	TP	2.05279	1.19231	44.366	1	1	0
NUDT5	NEO	TP	2.20235	1.04738	44.366	1	1	0
HMBS	NEO	TP	2.30282	1.15276	40.5786	1	1	0
CSNK1G2	NEO	TP	1.81798	1.085	48.131	1	0	0
TK1	NEO	TP	2.10134	1.25409	44.366	1	1	0
CDC45	NEO	TP	2.37951	1.51002	36.4356	1	1	1
DHTKD1	NEO	TP	1.92404	1.13771	44.366	1	1	0
METTL13	NEO	TP	1.64985	1.27917	48.131	1	0	0
SNAPC4	NEO	TP	3.2303	1.38045	16.0762	1	1	1
PCCB	NEO	TP	1.85276	1.10586	48.131	1	0	0
CXCR2P1	NEO	TP	2.06206	1.69123	44.366	1	1	0
HMGB2	NEO	TP	2.22887	1.07711	40.5786	1	1	0
H2AFX	NEO	TP	1.67208	1.13058	48.131	1	0	0
NME1	NEO	TP	2.19484	1.56928	44.366	1	0	0
TUBD1	NEO	TP	1.82407	1.1279	48.131	1	0	0
REXO4	NEO	TP	1.96654	1.06842	44.366	1	1	0
PIM2	NEO	TP	1.7547	1.2161	48.131	1	0	0
DNA2	NEO	TP	1.95498	1.12492	44.366	1	1	0
PHLDA2	NEO	TP	2.36749	1.84979	36.4356	1	1	1
DCUN1D5	NEO	TP	2.47085	1.10501	30.4238	1	1	1
ZNF513	NEO	TP	1.9601	1.15718	44.366	1	1	0
ZNF71	NEO	TP	2.05038	1.33207	44.366	1	0	0
TMUB1	NEO	TP	1.79692	1.12233	48.131	1	0	0
TLE1	NEO	TP	1.8106	1.23354	48.131	1	0	0
PQLC1	NEO	TP	1.66625	1.18201	48.131	1	0	0
FXN	NEO	TP	2.28725	1.18423	40.5786	1	1	0
LIMD1	NEO	TP	2.6868	1.15696	28.5306	1	1	1
DCD	NEO	TP	2.46058	9.58027	30.4238	1	1	1
TMEM40	NEO	TP	1.79386	1.83921	48.131	1	0	0
NAGK	NEO	TP	1.98113	1.07287	44.366	1	1	0
TARS	NEO	TP	1.85557	1.05173	48.131	1	0	0
NCLN	NEO	TP	1.79324	1.11227	48.131	1	0	0
HIST1H2AL	NEO	TP	2.15303	1.17966	44.366	1	1	0
INTS7	NEO	TP	2.39803	1.11136	36.4356	1	1	1
CCT6P1	NEO	TP	1.8749	1.15709	48.131	1	0	0
RFC2	NEO	TP	2.0007	1.08233	44.366	1	1	0
YWHAQ	NEO	TP	2.39023	1.04892	36.4356	1	1	1
FAM73B	NEO	TP	1.67789	1.32483	48.131	1	0	0
RFFL	NEO	TP	1.65117	1.09094	48.131	1	0	0
SNHG4	NEO	TP	1.88286	1.12172	48.131	1	0	0
KIF4A	NEO	TP	2.14476	1.25234	44.366	1	1	0
IRF7	NEO	TP	1.74641	1.1294	48.131	1	0	0
UBE2C	NEO	TP	1.6695	1.15567	48.131	1	0	0
ASPM	NEO	TP	3.16148	1.45421	16.0762	1	1	1
CDK1	NEO	TP	1.88312	1.15594	48.131	1	0	0
GTF2H2B	NEO	TP	1.8814	1.8807	48.131	1	0	0
PSAT1	NEO	TP	1.93913	1.31984	44.366	1	1	0
MRRF	NEO	TP	3.58068	1.10479	6.80148	1	0	0
TMEM203	NEO	TP	1.74898	1.06532	48.131	1	0	0
CENPO	NEO	TP	2.03592	1.18713	44.366	1	1	0
C19orf59	NEO	TP	2.38647	3.55918	36.4356	1	1	1
OIP5	NEO	TP	2.21149	1.34654	44.366	1	0	0
ALG6	NEO	TP	2.48273	1.13221	30.4238	1	1	1
DLGAP5	NEO	TP	2.22306	1.24866	40.5786	1	1	0
CEP55	NEO	TP	1.79333	1.21241	48.131	1	0	0
MFSD2A	NEO	TP	2.63668	1.68572	30.4238	1	1	1
ATP5J2	NEO	TP	1.7662	1.03119	48.131	1	0	0
INTS8	NEO	TP	1.93322	1.06124	44.366	1	1	0
NCS1	NEO	TP	1.99086	1.12165	44.366	1	0	0
PPP2R4	NEO	TP	2.40653	1.07171	36.4356	1	1	1
MELK	NEO	TP	2.21655	1.25126	40.5786	1	1	0
CTDP1	NEO	TP	1.71636	1.15745	48.131	1	0	0
SLC25A10	NEO	TP	1.76896	1.28658	48.131	1	0	0
AP2S1	NEO	TP	1.92757	1.05497	44.366	1	1	0
SPIRE2	NEO	TP	1.76771	1.44416	48.131	1	0	0
ZBP1	NEO	TP	1.84113	1.4781	48.131	1	0	0
FEN1	NEO	TP	2.0515	1.23355	44.366	1	1	0
POP7	NEO	TP	1.91612	1.10006	44.366	1	1	0
BRD9	NEO	TP	1.68271	1.09134	48.131	1	0	0
WDR85	NEO	TP	2.76166	1.35163	28.5306	1	1	1
ITGB7	NEO	TP	1.8033	1.27649	48.131	1	0	0
SDHA	NEO	TP	3.65827	1.10589	6.80148	1	0	0
CENPM	NEO	TP	2.12135	1.63384	44.366	1	0	0
STRAP	NEO	TP	1.98251	1.07397	44.366	1	1	0
GTPBP8	NEO	TP	2.16216	1.14354	44.366	1	1	0
RPP30	NEO	TP	2.13792	1.24283	44.366	1	0	0
NOP10	NEO	TP	1.87937	1.05766	48.131	1	0	0
PRF1	NEO	TP	1.9065	1.87839	44.366	1	0	0
FAM83D	NEO	TP	1.94021	1.32646	44.366	1	1	0
TSSC1	NEO	TP	1.8001	1.08853	48.131	1	0	0
ISCA1	NEO	TP	1.83148	1.1211	48.131	1	0	0
LLGL2	NEO	TP	1.84857	1.71375	48.131	1	0	0
NDUFS6	NEO	TP	2.0103	1.09599	44.366	1	1	0
TAF15	NEO	TP	2.33471	1.05406	36.4356	1	1	1
CCDC85C	NEO	TP	1.96322	1.48502	44.366	1	1	0
SHMT1	NEO	TP	1.74349	1.119	48.131	1	0	0
PAPD7	NEO	TP	1.82241	1.12279	48.131	1	0	0
RACGAP1	NEO	TP	2.2385	1.11895	40.5786	1	1	0
MCAT	NEO	TP	3.10028	1.21189	17.0037	1	1	1
E2F8	NEO	TP	1.68551	1.65277	48.131	1	0	0
BLM	NEO	TP	1.94045	1.28102	44.366	1	1	0
ABRACL	NEO	TP	3.45347	1.13681	6.80148	1	0	0
C1orf35	NEO	TP	1.69992	1.08966	48.131	1	0	0
SLC18B1	NEO	TP	1.92046	1.11632	44.366	1	1	0
CDC20	NEO	TP	2.11372	1.51199	44.366	1	1	0
VPS37B	NEO	TP	1.74978	1.10162	48.131	1	0	0
FADS2	NEO	TP	3.73006	1.30218	6.80148	1	0	0
CDC7	NEO	TP	1.70172	1.23432	48.131	1	0	0
SHOX2	NEO	TP	1.80774	1.37535	48.131	1	0	0
PDCD11	NEO	TP	1.70585	1.07162	48.131	1	0	0
TMSB15A	NEO	TP	1.70868	1.56521	48.131	1	0	0
TIAM1	NEO	TP	1.80426	1.19809	48.131	1	0	0
TUBB4B	NEO	TP	2.75161	1.29103	28.5306	1	1	1
DKK1	NEO	TP	2.26023	2.28328	40.5786	1	1	0
NDUFS2	NEO	TP	1.64895	1.04992	48.131	1	0	0
MKI67	NEO	TP	1.83158	1.25123	48.131	1	0	0
PKMYT1	NEO	TP	1.71675	1.59182	48.131	1	0	0
ZFYVE20	NEO	TP	1.8266	1.10805	48.131	1	0	0
LAG3	NEO	TP	2.58553	2.42169	30.4238	1	1	1
BRIP1	NEO	TP	1.78509	1.2778	48.131	1	0	0
MRPS16	NEO	TP	2.0094	1.05028	44.366	1	1	0
HCAR3	NEO	TP	1.67988	1.53969	48.131	1	0	0
HGS	NEO	TP	1.77559	1.07622	48.131	1	0	0
PMPCA	NEO	TP	2.23503	1.10728	40.5786	1	1	0
ADAT2	NEO	TP	1.82104	1.16103	48.131	1	0	0
E2F2	NEO	TP	1.7178	1.65512	48.131	1	0	0
KIAA0586	NEO	TP	1.79071	1.11136	48.131	1	0	0
TRMU	NEO	TP	1.94232	1.09677	44.366	1	1	0
CLPTM1L	NEO	TP	3.07263	1.09255	17.0037	1	1	1
KNTC1	NEO	TP	1.90698	1.08385	44.366	1	1	0
SLC4A11	NEO	TP	2.82505	2.10948	28.5306	1	1	1
ORC1	NEO	TP	2.17211	1.74598	44.366	1	1	0
POLE3	NEO	TP	1.67224	1.03297	48.131	1	0	0
LOC220729	NEO	TP	2.38383	1.29262	36.4356	1	1	1
PTPN2	NEO	TP	1.67019	1.0843	48.131	1	0	0
MTMR14	NEO	TP	1.8771	1.05395	48.131	1	0	0
GTF2E1	NEO	TP	2.31459	1.08517	40.5786	1	1	0
AQP9	NEO	TP	1.83428	1.60269	48.131	1	0	0
HSPA14	NEO	TP	3.63572	1.17212	6.80148	1	0	0
PLAA	NEO	TP	1.85491	1.08176	48.131	1	0	0
UBE2T	NEO	TP	2.4933	1.15928	30.4238	1	1	1
CNOT6	NEO	TP	1.71332	1.05884	48.131	1	0	0
DHRS11	NEO	TP	2.51689	1.27676	30.4238	1	1	1
ZWINT	NEO	TP	1.78087	1.1302	48.131	1	0	0
C9orf114	NEO	TP	2.37037	1.11356	36.4356	1	1	1
VGF	NEO	TP	1.8802	18.9864	48.131	1	0	0
EHMT1	NEO	TP	2.30027	1.10967	40.5786	1	1	0
GTSE1	NEO	TP	1.8933	1.47171	44.366	1	1	0
PPP1R1A	NEO	TP	1.89065	1.61269	44.366	1	1	0
UBAC1	NEO	TP	3.5791	1.15973	6.80148	1	0	0
LPCAT1	NEO	TP	1.81236	1.10389	48.131	1	0	0
NUF2	NEO	TP	2.01523	1.28208	44.366	1	1	0
DENND1A	NEO	TP	2.31393	1.09772	40.5786	1	1	0
UQCRH	NEO	TP	1.88068	1.0723	48.131	1	0	0
TBC1D3F	NEO	TP	1.6984	1.16795	48.131	1	0	0
MCM5	NEO	TP	2.12005	1.1688	44.366	1	1	0
CENPF	NEO	TP	2.18807	1.15995	44.366	1	1	0
PRIM1	NEO	TP	2.10735	1.12284	44.366	1	1	0
PSMD3	NEO	TP	2.53986	1.21523	30.4238	1	1	1
HIST1H4I	NEO	TP	1.67461	1.22733	48.131	1	0	0
BCL2L12	NEO	TP	2.41282	1.13577	36.4356	1	1	1
HIST1H2AM	NEO	TP	1.81229	1.09018	48.131	1	0	0
BCAP31	NEO	TP	1.70132	1.42072	48.131	1	0	0
LOC728554	NEO	TP	2.41585	1.13414	36.4356	1	1	1
FAM5C	NEO	TP	1.73806	2.44971	48.131	1	0	0
SRCIN1	NEO	TP	2.28935	2.20287	40.5786	1	1	0
HIST1H3G	NEO	TP	2.20206	1.25852	44.366	1	1	0
NUBP2	NEO	TP	1.79222	1.31834	48.131	1	0	0
SHPRH	NEO	TP	1.74304	1.08255	48.131	1	0	0
ERP29	NEO	TP	2.37627	1.07776	36.4356	1	1	1
RAB33A	NEO	TP	1.70867	1.55673	48.131	1	0	0
HIST3H2BB	NEO	TP	1.91585	1.18641	44.366	1	0	0
FBXO6	NEO	TP	1.76579	1.17518	48.131	1	0	0
THOP1	NEO	TP	1.8406	1.11037	48.131	1	0	0
EIF2S1	NEO	TP	1.78819	1.05589	48.131	1	0	0
SNORA2B	NEO	TP	1.71593	1.1953	48.131	1	0	0
ATAD3A	NEO	TP	2.09968	1.18682	44.366	1	1	0
ADI1	NEO	TP	2.35305	1.12845	36.4356	1	1	1
TRABD	NEO	TP	1.73165	1.12315	48.131	1	0	0
MED23	NEO	TP	1.83854	1.08169	48.131	1	0	0
HIST1H2AJ	NEO	TP	1.75311	1.13386	48.131	1	0	0
ENSA	NEO	TP	1.83645	1.05753	48.131	1	0	0
THOC3	NEO	TP	2.1877	1.13225	44.366	1	1	0
TAF9	NEO	TP	2.42427	1.23562	36.4356	1	1	1
CLSPN	NEO	TP	1.83966	1.27927	48.131	1	0	0
ABHD12	NEO	TP	1.80051	1.0782	48.131	1	0	0
VAPA	NEO	TP	1.99075	1.18814	44.366	1	0	0
ZNF543	NEO	TP	1.89357	1.10325	44.366	1	1	0
SLC48A1	NEO	TP	1.81882	1.17351	48.131	1	0	0
EPHB6	NEO	TP	2.38563	1.47974	36.4356	1	1	1
ECT2	NEO	TP	1.79203	1.13772	48.131	1	0	0
HIST1H2BC	NEO	TP	1.74561	1.06309	48.131	1	0	0
SRSF7	NEO	TP	2.21506	1.03874	40.5786	1	1	0
FDPS	NEO	TP	2.37969	1.07494	36.4356	1	1	1
SRXN1	NEO	TP	1.74146	1.12638	48.131	1	0	0
EEFSEC	NEO	TP	1.7636	1.13387	48.131	1	0	0
CKS2	NEO	TP	2.46994	1.19532	30.4238	1	1	1
TAF11	NEO	TP	1.8205	1.06898	48.131	1	0	0
HPCAL1	NEO	TP	1.84482	1.14376	48.131	1	0	0
POLE2	NEO	TP	1.67055	1.30549	48.131	1	0	0
LOC100335030	NEO	TP	1.81434	1.18884	48.131	1	0	0
ERH	NEO	TP	2.49812	1.05468	30.4238	1	1	1
GBP5	NEO	TP	1.77539	1.22581	48.131	1	0	0
CCNA2	NEO	TP	1.80933	1.19608	48.131	1	0	0
S100A14	NEO	TP	2.02479	1.15568	44.366	1	0	0
TOP3A	NEO	TP	2.25546	1.10812	40.5786	1	1	0
REPIN1	NEO	TP	2.54595	1.31941	30.4238	1	1	1
ATAD5	NEO	TP	2.21808	1.38928	40.5786	1	1	0
FZD5	NEO	TP	2.03492	1.5394	44.366	1	1	0
CHORDC1	NEO	TP	1.79491	1.07752	48.131	1	0	0
HNRNPAB	NEO	TP	2.40814	1.06464	36.4356	1	1	1
C2orf69	NEO	TP	2.03978	1.08487	44.366	1	1	0
COQ4	NEO	TP	1.71721	1.10767	48.131	1	0	0
DEPDC1B	NEO	TP	3.14566	1.57406	17.0037	1	1	1
MIS18BP1	NEO	TP	1.71875	1.06578	48.131	1	0	0
SIRT6	NEO	TP	1.92089	1.11409	44.366	1	1	0
TXNDC17	NEO	TP	2.64274	1.10935	30.4238	1	1	1
CENPA	NEO	TP	2.2455	1.52638	40.5786	1	1	0
BDH1	NEO	TP	2.88886	1.21636	26.3501	1	1	1
TDRD1	NEO	TP	2.63946	5.3141	30.4238	1	1	1
CXCR6	NEO	TP	2.05411	1.52411	44.366	1	1	0
CLK4	NEO	TP	1.69375	1.14795	48.131	1	0	0
WDR5	NEO	TP	2.69435	1.11914	28.5306	1	1	1
CTU2	NEO	TP	1.77474	1.21206	48.131	1	0	0
SUPT16H	NEO	TP	1.82901	1.04995	48.131	1	0	0
HBEGF	NEO	TP	1.9763	1.27161	44.366	1	1	0
SLC29A2	NEO	TP	1.7956	1.51629	48.131	1	0	0
SPATA2L	NEO	TP	2.01507	1.22218	44.366	1	1	0
PDSS1	NEO	TP	2.99465	1.16353	21.6955	1	1	1
SNORA33	NEO	TP	2.55491	1.17047	30.4238	1	1	1
BRI3BP	NEO	TP	2.03581	1.23486	44.366	1	1	0
NUP188	NEO	TP	1.90271	1.07608	44.366	1	1	0
HIST1H2BM	NEO	TP	1.6968	1.17067	48.131	1	0	0
KIF14	NEO	TP	2.30917	1.61073	40.5786	1	1	0
PPP2R3B	NEO	TP	1.71874	1.18139	48.131	1	0	0
KIF22	NEO	TP	1.78413	1.16553	48.131	1	0	0
MAL	NEO	TP	1.85944	2.06584	48.131	1	0	0
NDUFAF6	NEO	TP	1.94262	1.11675	44.366	1	1	0
GNLY	NEO	TP	1.93025	1.28853	44.366	1	1	0
RFC3	NEO	TP	2.19685	1.15811	44.366	1	1	0
HELLS	NEO	TP	1.83101	1.15801	48.131	1	0	0
WWC1	NEO	TP	2.23474	1.11779	40.5786	1	1	0
IFNG	NEO	TP	2.41121	2.765	36.4356	1	1	1
GRK6	NEO	TP	1.83446	1.12248	48.131	1	0	0
FLCN	NEO	TP	2.05413	1.13975	44.366	1	1	0
POU2AF1	NEO	TP	1.80651	1.55094	48.131	1	0	0
NVL	NEO	TP	2.01282	1.08605	44.366	1	1	0
TOR2A	NEO	TP	1.98336	1.35255	44.366	1	1	0
HDHD3	NEO	TP	1.99957	1.15281	44.366	1	1	0
MRPL39	NEO	TP	1.7455	1.06208	48.131	1	0	0
COX7B	NEO	TP	2.15395	1.0607	44.366	1	1	0
CCNE1	NEO	TP	2.57094	1.77982	30.4238	1	1	1
SLC25A5	NEO	TP	2.78254	1.06929	28.5306	1	1	1
PRELID1	NEO	TP	2.53906	1.06403	30.4238	1	1	1
FCRL5	NEO	TP	1.75837	1.49262	48.131	1	0	0
ERO1L	NEO	TP	1.81702	1.11919	48.131	1	0	0
SMPD2	NEO	TP	1.82697	1.17938	48.131	1	0	0
RPS14	NEO	TP	2.40028	1.17961	36.4356	1	1	1
DIP2B	NEO	TP	1.95142	1.08829	44.366	1	1	0
ORMDL3	NEO	TP	2.12042	1.23493	44.366	1	0	0
ABCD2	NEO	TP	1.97957	1.59915	44.366	1	0	0
HIST1H4A	NEO	TP	1.70031	1.14177	48.131	1	0	0
HSPD1	NEO	TP	2.44807	1.05329	30.4238	1	1	1
NDUFS7	NEO	TP	2.16784	1.09005	44.366	1	1	0
ARHGAP11A	NEO	TP	1.67812	1.18024	48.131	1	0	0
EZH2	NEO	TP	2.25403	1.16524	40.5786	1	1	0
CDC6	NEO	TP	3.09006	1.4456	17.0037	1	1	1
PIP5K1B	NEO	TP	3.10344	1.92211	17.0037	1	1	1
TNFRSF13B	NEO	TP	1.71907	2.64721	48.131	1	0	0
POLR1E	NEO	TP	2.52071	1.10238	30.4238	1	1	1
ATOX1	NEO	TP	1.6693	1.04739	48.131	1	0	0
RCCD1	NEO	TP	1.99886	1.88161	44.366	1	1	0
HIST1H3F	NEO	TP	1.84628	1.15256	48.131	1	0	0
SERHL2	NEO	TP	1.94601	1.52113	44.366	1	1	0
TSEN54	NEO	TP	2.44398	1.1527	30.4238	1	1	1
ARG2	NEO	TP	1.66765	1.34372	48.131	1	0	0
DNMT3A	NEO	TP	1.9262	1.1615	44.366	1	1	0
FANCB	NEO	TP	1.80227	1.34092	48.131	1	0	0
TEX2	NEO	TP	1.91331	1.0926	44.366	1	1	0
ZNF259	NEO	TP	2.57968	1.24415	30.4238	1	1	1
B3GALNT2	NEO	TP	2.06533	1.09407	44.366	1	1	0
ADAM15	NEO	TP	2.25617	1.12621	40.5786	1	1	0
PPIF	NEO	TP	2.7112	1.1511	28.5306	1	1	1
ASF1B	NEO	TP	1.82626	1.3219	48.131	1	0	0
STX17	NEO	TP	2.12366	1.07034	44.366	1	0	0
SURF2	NEO	TP	3.39258	1.19302	9.82436	1	0	0
CCDC64	NEO	TP	1.77527	1.22253	48.131	1	0	0
CKAP2L	NEO	TP	1.94213	1.27034	44.366	1	1	0
FOXO3B	NEO	TP	2.21729	1.17094	40.5786	1	1	0
AURKB	NEO	TP	1.9338	1.87437	44.366	1	1	0
TOMM70A	NEO	TP	2.51091	1.07087	30.4238	1	1	1
MXD3	NEO	TP	2.37062	1.38696	36.4356	1	1	1
CCNB1IP1	NEO	TP	2.28122	1.08847	40.5786	1	1	0
NUDCD2	NEO	TP	2.38549	1.09159	36.4356	1	1	0
HAUS2	NEO	TP	1.81632	1.11908	48.131	1	0	0
GNPNAT1	NEO	TP	1.87491	1.07684	48.131	1	0	0
SERINC2	NEO	TP	1.86705	1.10517	48.131	1	0	0
CDKN3	NEO	TP	2.61686	1.20493	30.4238	1	1	1
WDHD1	NEO	TP	1.92436	1.24503	44.366	1	1	0
GPR19	NEO	TP	1.84649	1.47637	48.131	1	0	0
C1QBP	NEO	TP	2.58027	1.07528	30.4238	1	1	1
OLA1	NEO	TP	1.87312	1.03648	48.131	1	0	0
C19orf24	NEO	TP	1.74333	1.07926	48.131	1	0	0
RABL6	NEO	TP	1.87474	1.09816	48.131	1	0	0
PITHD1	NEO	TP	2.03058	1.05946	44.366	1	1	0
XRCC3	NEO	TP	1.75052	1.24859	48.131	1	0	0
UBE2D1	NEO	TP	2.06442	1.11903	44.366	1	1	0
ZBTB17	NEO	TP	2.82867	1.18869	28.5306	1	1	1
MCTS1	NEO	TP	1.69678	1.09298	48.131	1	0	0
WDR46	NEO	TP	1.96913	1.13395	44.366	1	1	0
BID	NEO	TP	2.07496	1.18639	44.366	1	0	0
HIST1H2AI	NEO	TP	1.82061	1.37711	48.131	1	0	0
PTGES2	NEO	TP	2.35931	1.15538	36.4356	1	1	1
ZNF581	NEO	TP	2.41252	1.23191	36.4356	1	1	1
RPS7	NEO	TP	2.10552	1.54271	44.366	1	1	0
HLX	NEO	TP	1.64836	1.14243	48.131	1	0	0
MEX3A	NEO	TP	1.81537	1.59863	48.131	1	0	0
MPND	NEO	TP	1.80915	1.17141	48.131	1	0	0
HIST1H2BL	NEO	TP	2.14924	1.67665	44.366	1	1	0
SLC35F2	NEO	TP	2.63653	1.53471	30.4238	1	1	1
MSMO1	NEO	TP	1.95337	1.0933	44.366	1	1	0
TIMM21	NEO	TP	1.96557	1.08593	44.366	1	1	0
HINT1	NEO	TP	2.46449	1.06455	30.4238	1	1	1
LAX1	NEO	TP	1.78026	1.39818	48.131	1	0	0
CENPK	NEO	TP	3.14111	1.61996	17.0037	1	1	1
GCAT	NEO	TP	2.41946	1.33278	36.4356	1	1	1
SLC25A33	NEO	TP	2.75982	1.39445	28.5306	1	1	1
MIIP	NEO	TP	2.16628	1.12058	44.366	1	0	0
HOXC10	NEO	TP	1.99704	1.51985	44.366	1	0	0
OBP2B	NEO	TP	2.22391	2.09024	40.5786	1	1	0
HSH2D	NEO	TP	1.65087	1.3134	48.131	1	0	0
BUB1	NEO	TP	2.35617	1.24327	36.4356	1	1	1
SPNS2	NEO	TP	1.89023	1.59534	44.366	1	1	0
TSSC4	NEO	TP	2.09227	1.11323	44.366	1	1	0
AP5Z1	NEO	TP	2.10866	1.20883	44.366	1	0	0
LAMTOR2	NEO	TP	2.04832	1.06079	44.366	1	1	0
SNRPE	NEO	TP	1.73156	1.05757	48.131	1	0	0
ATP5G3	NEO	TP	1.75423	1.04146	48.131	1	0	0
LDHB	NEO	TP	1.84362	1.08955	48.131	1	0	0
GLMN	NEO	TP	1.8126	1.21928	48.131	1	0	0
FRAT2	NEO	TP	2.2395	1.11799	40.5786	1	1	0
TEAD4	NEO	TP	1.99374	1.16573	44.366	1	1	0
GRB7	NEO	TP	2.85479	1.65198	28.5306	1	1	1
AIFM1	NEO	TP	1.85733	1.08916	48.131	1	0	0
DNAAF2	NEO	TP	1.79355	1.1133	48.131	1	0	0
STIP1	NEO	TP	2.23643	1.05582	40.5786	1	1	0
MRPL38	NEO	TP	1.72095	1.115	48.131	1	0	0
ATF3	NEO	TP	1.91442	1.24473	44.366	1	1	0
UCHL3	NEO	TP	1.67336	1.07156	48.131	1	0	0
SPAG5	NEO	TP	1.87008	1.20835	48.131	1	0	0
DDX31	NEO	TP	1.86375	1.07369	48.131	1	0	0
BUB1B	NEO	TP	1.72237	1.17824	48.131	1	0	0
C9orf142	NEO	TP	3.53772	1.14603	6.80148	1	0	0
ELL3	NEO	TP	1.69856	1.17287	48.131	1	0	0
NDUFAF4	NEO	TP	2.1786	1.09099	44.366	1	1	0
ESRRA	NEO	TP	2.51456	1.25691	30.4238	1	1	1
CENPW	NEO	TP	1.99024	1.20389	44.366	1	1	0
UBE2M	NEO	TP	1.6788	1.07151	48.131	1	0	0
CDK2	NEO	TP	1.80597	1.06621	48.131	1	0	0
EIF5A	NEO	TP	1.99248	1.051	44.366	1	0	0
SASH1	NEO	TP	1.64637	1.18433	48.131	1	0	0
PKN3	NEO	TP	1.73164	1.58159	48.131	1	0	0
UHRF1	NEO	TP	1.85145	1.36849	48.131	1	0	0
CASP10	NEO	TP	1.98618	1.25157	44.366	1	1	0
ZADH2	NEO	TP	1.89618	1.23109	44.366	1	1	0
PIK3R3	NEO	TP	2.07079	1.10162	44.366	1	1	0
ARRDC1	NEO	TP	1.92206	1.14166	44.366	1	1	0
PPP1R1B	NEO	TP	1.68559	1.4557	48.131	1	0	0
CDCA8	NEO	TP	1.72191	1.4226	48.131	1	0	0
RPL7A	NEO	TP	2.0229	1.0404	44.366	1	1	0
HIST1H3J	NEO	TP	1.7766	1.17718	48.131	1	0	0
LRRC45	NEO	TP	1.97274	1.16676	44.366	1	0	0
ZNF586	NEO	TP	2.82385	1.0941	28.5306	1	1	1
CDC42EP4	NEO	TP	1.99144	1.29958	44.366	1	1	0
ETFA	NEO	TP	1.95816	1.09873	44.366	1	1	0
MND1	NEO	TP	2.08053	1.37804	44.366	1	0	0
RRM2	NEO	TP	2.20387	1.20182	44.366	1	1	0
NUP88	NEO	TP	2.03824	1.10938	44.366	1	1	0
WASH1	NEO	TP	1.78709	1.59691	48.131	1	0	0
RPF2	NEO	TP	2.29388	1.15814	40.5786	1	1	0
SNX3	NEO	TP	1.73229	1.05904	48.131	1	0	0
ADO	NEO	TP	1.73573	1.07571	48.131	1	0	0
KIF20B	NEO	TP	2.02086	1.16526	44.366	1	0	0
CCT5	NEO	TP	1.94503	1.0521	44.366	1	1	0
SMC6	NEO	TP	2.06684	1.07399	44.366	1	1	0
HIST3H2A	NEO	TP	2.46741	1.46872	30.4238	1	1	1
MLF1IP	NEO	TP	2.73439	1.22518	28.5306	1	1	1
ITGB3BP	NEO	TP	1.75269	1.15209	48.131	1	0	0
PITPNM1	NEO	TP	1.67719	1.29047	48.131	1	0	0
BCS1L	NEO	TP	1.92689	1.0782	44.366	1	1	0
GLRX5	NEO	TP	1.91882	1.05565	44.366	1	1	0
CCNB1	NEO	TP	2.6121	1.21276	30.4238	1	1	1
C14orf80	NEO	TP	1.74462	1.54104	48.131	1	0	0
FPGS	NEO	TP	1.81151	1.11688	48.131	1	0	0
ABCF3	NEO	TP	1.75193	1.08457	48.131	1	0	0
SET	NEO	TP	2.62715	1.03792	30.4238	1	1	1
PGK1	NEO	TP	1.7601	1.0498	48.131	1	0	0
NDC80	NEO	TP	2.32705	1.40514	36.4356	1	1	1
HIST1H2BF	NEO	TP	1.91167	1.14537	44.366	1	1	0
TRIM26	NEO	TP	2.13634	1.11917	44.366	1	1	0
AP5B1	NEO	TP	2.07223	1.35858	44.366	1	1	0
SOX11	NEO	TP	1.73874	1.64793	48.131	1	0	0
CD3EAP	NEO	TP	1.94143	1.11572	44.366	1	1	0
RBP5	NEO	TP	1.962	1.43906	44.366	1	1	0
E2F5	NEO	TP	1.96996	1.10866	44.366	1	1	0
HIST1H2BI	NEO	TP	1.68578	1.13751	48.131	1	0	0
NMI	NEO	TP	1.74253	1.11676	48.131	1	0	0
SH3RF2	NEO	TP	1.86234	1.93597	48.131	1	0	0
HIST1H4B	NEO	TP	1.71811	1.06858	48.131	1	0	0
POC1A	NEO	TP	2.30519	1.59221	40.5786	1	1	0
IRF4	NEO	TP	1.85553	1.53711	48.131	1	0	0
GSG2	NEO	TP	2.73576	1.52152	28.5306	1	1	1
NCAPG	NEO	TP	2.48024	1.2756	30.4238	1	1	1
FCGR3B	NEO	TP	3.6315	2.36627	6.80148	1	0	0
HN1	NEO	TP	2.64359	1.17207	30.4238	1	1	1
TSPAN17	NEO	TP	2.08631	1.10019	44.366	1	1	0
ZC3H8	NEO	TP	1.85112	1.10215	48.131	1	0	0
STIL	NEO	TP	1.91307	1.17327	44.366	1	1	0
FLT4	NEO	TP	1.86599	1.38484	48.131	1	0	0
HIST1H2AH	NEO	TP	1.71066	1.09667	48.131	1	0	0
HIST1H1B	NEO	TP	1.8809	1.14546	48.131	1	0	0
DHFR	NEO	TP	2.64634	1.10565	30.4238	1	1	1
LOC155060	NEO	TP	1.90472	1.57486	44.366	1	1	0
ATAD2B	NEO	TP	2.06986	1.17487	44.366	1	1	0
CCBP2	NEO	TP	1.98395	2.6522	44.366	1	0	0
ACAT2	NEO	TP	1.9755	1.11516	44.366	1	1	0
MIF4GD	NEO	TP	1.84087	1.27487	48.131	1	0	0
FANCG	NEO	TP	2.5902	1.13233	30.4238	1	1	1
PTCD3	NEO	TP	2.27209	1.06268	40.5786	1	1	0
MLKL	NEO	TP	1.83483	1.14538	48.131	1	0	0
ENDOG	NEO	TP	1.72654	1.0926	48.131	1	0	0
CDCA5	NEO	TP	1.68086	1.23433	48.131	1	0	0
AKR1A1	NEO	TP	1.66606	1.05335	48.131	1	0	0
MZB1	NEO	TP	1.84625	1.34673	48.131	1	0	0
TRAIP	NEO	TP	2.51936	1.24631	30.4238	1	1	1
MVK	NEO	TP	1.86495	1.17996	48.131	1	0	0
TMEM206	NEO	TP	2.18143	1.12401	44.366	1	0	0
PDSS2	NEO	TP	2.23244	1.26844	40.5786	1	1	0
SKA2	NEO	TP	1.71201	1.08728	48.131	1	0	0
IDI1	NEO	TP	1.90836	1.06127	44.366	1	1	0
PTTG1	NEO	TP	2.82936	1.55613	28.5306	1	1	1
COQ3	NEO	TP	2.52073	1.45143	30.4238	1	1	1
AGMAT	NEO	TP	2.6806	1.7293	28.5306	1	1	1
GEN1	NEO	TP	1.99883	1.14026	44.366	1	1	0
EIF2S3	NEO	TP	1.99312	1.04731	44.366	1	0	0
ZNF695	NEO	TP	2.40232	1.51761	36.4356	1	1	1
CCBL1	NEO	TP	1.78658	1.43676	48.131	1	0	0
TNFRSF17	NEO	TP	2.09823	1.78092	44.366	1	1	0
TACO1	NEO	TP	1.84534	1.12082	48.131	1	0	0
DHRS4L2	NEO	TP	2.23449	1.33852	40.5786	1	1	0
CSAG1	NEO	TP	1.68851	3.73131	48.131	1	0	0
KIF2C	NEO	TP	2.29153	1.32603	40.5786	1	1	0
CMC1	NEO	TP	1.77335	1.17928	48.131	1	0	0
MCM7	NEO	TP	1.69439	1.12775	48.131	1	0	0
ZMYND19	NEO	TP	2.70647	1.19252	28.5306	1	1	1
C19orf66	NEO	TP	1.86773	1.0926	48.131	1	0	0
RABIF	NEO	TP	1.84464	1.05837	48.131	1	0	0
SKA1	NEO	TP	1.87645	1.47655	48.131	1	0	0
NOP16	NEO	TP	2.4419	1.12489	30.4238	1	1	1
GLYATL2	NEO	TP	1.90564	1.49199	44.366	1	0	0
AP1S3	NEO	TP	1.8658	1.24436	48.131	1	0	0
ERBB2	NEO	TP	2.24778	1.32395	40.5786	1	1	0
IL1RN	NEO	TP	2.84025	1.54536	28.5306	1	1	1
PARPBP	NEO	TP	1.99445	1.2163	44.366	1	1	0
BTAF1	NEO	TP	2.24838	1.06558	40.5786	1	1	0
TYMS	NEO	TP	1.8566	1.15758	48.131	1	0	0
ARPC5L	NEO	TP	2.59724	1.19969	30.4238	1	1	1
NEIL3	NEO	TP	2.19416	1.21742	44.366	1	1	0
SCO2	NEO	TP	2.32662	1.14995	36.4356	1	1	1
MTHFD2	NEO	TP	2.00258	1.07865	44.366	1	1	0
E2F1	NEO	TP	1.76451	1.294	48.131	1	0	0
KLRG2	NEO	TP	2.06688	1.82779	44.366	1	1	0
ABCC2	NEO	TP	1.65557	2.71115	48.131	1	0	0
PARP2	NEO	TP	1.72984	1.11293	48.131	1	0	0
FANCA	NEO	TP	1.67792	1.53545	48.131	1	0	0
HOXC9	NEO	TP	1.88071	1.28313	48.131	1	0	0
PDIA6	NEO	TP	1.72656	1.05312	48.131	1	0	0
U2AF2	NEO	TP	2.07767	1.05455	44.366	1	1	0
MTF2	NEO	TP	1.98084	1.06845	44.366	1	1	0
CIT	NEO	TP	1.75001	1.37761	48.131	1	0	0
FAM49B	NEO	TP	1.97797	1.06846	44.366	1	1	0
CHAC2	NEO	TP	1.94464	1.2791	44.366	1	1	0
FGFR4	NEO	TP	1.78585	1.98235	48.131	1	0	0
SGOL1	NEO	TP	2.49708	1.53461	30.4238	1	1	1
FAM111B	NEO	TP	2.32261	1.27	36.4356	1	1	1
SAE1	NEO	TP	1.72203	1.04343	48.131	1	0	0
PDXP	NEO	TP	2.0233	1.41459	44.366	1	0	0
C7orf29	NEO	TP	2.39504	1.39225	36.4356	1	1	1
PCYT2	NEO	TP	2.43585	1.29063	30.4238	1	1	1
HIST1H3B	NEO	TP	2.17787	1.14338	44.366	1	1	0
HIST1H2AG	NEO	TP	1.87294	1.10865	48.131	1	0	0
LRRC58	NEO	TP	1.74893	1.09869	48.131	1	0	0
HIST1H2AE	NEO	TP	1.72857	1.12336	48.131	1	0	0
PSMB3	NEO	TP	1.97594	1.08721	44.366	1	0	0
ATP1A3	NEO	TP	1.73761	6.5092	48.131	1	0	0
STARD3	NEO	TP	2.70968	1.25485	28.5306	1	1	1
ZNF485	NEO	TP	2.69882	1.21767	28.5306	1	1	1
SUV39H2	NEO	TP	2.73414	1.21699	28.5306	1	1	1
NTMT1	NEO	TP	2.90287	1.29613	26.3501	1	1	1
NDUFV2	NEO	TP	2.07052	1.08951	44.366	1	1	0
HIST2H3D	NEO	TP	2.11784	1.30643	44.366	1	1	0
PSMD9	NEO	TP	1.79139	1.064	48.131	1	0	0
CD274	NEO	TP	1.88821	1.3909	48.131	1	0	0
RHOF	NEO	TP	1.94898	1.39934	44.366	1	0	0
KIF11	NEO	TP	2.71638	1.72993	28.5306	1	1	1
LMNB2	NEO	TP	1.70649	1.10952	48.131	1	0	0
SIRPG	NEO	TP	1.87168	1.41967	48.131	1	0	0
DOLPP1	NEO	TP	2.07291	1.14914	44.366	1	1	0
FLAD1	NEO	TP	1.8115	1.14811	48.131	1	0	0
RIPK2	NEO	TP	1.7835	1.0844	48.131	1	0	0
SPC24	NEO	TP	1.75537	1.23863	48.131	1	0	0
TRPV6	NEO	TP	2.30277	1.81638	40.5786	1	1	0
CENPI	NEO	TP	1.68205	1.19205	48.131	1	0	0
CCNB2	NEO	TP	1.90702	1.203	44.366	1	1	0
WDR34	NEO	TP	1.81471	1.13402	48.131	1	0	0
KIF20A	NEO	TP	1.69781	1.26619	48.131	1	0	0
SHCBP1	NEO	TP	1.98204	1.35289	44.366	1	1	0
SERINC3	NEO	TP	-2.07929	0.931737	36.4356	1	0	0
CTTNBP2	NEO	TP	-2.78775	0.284341	20.8295	1	1	1
PAPSS1	NEO	TP	-2.2883	0.901044	30.4238	1	1	0
RING1	NEO	TP	-1.68619	0.955554	48.131	1	0	0
GALNT5	NEO	TP	-1.98258	0.631344	36.4356	1	0	0
FLNB	NEO	TP	-2.56359	0.898229	24.4853	1	1	1
FZD6	NEO	TP	-2.30832	0.849701	30.4238	1	1	0
FAM114A1	NEO	TP	-3.13527	0.861474	17.0037	1	1	1
AS3MT	NEO	TP	-2.3844	0.782913	28.5306	1	1	0
SERPINA5	NEO	TP	-2.05208	0.491741	36.4356	1	0	0
DNAJB14	NEO	TP	-1.8372	0.938608	40.5786	1	0	0
CRIM1	NEO	TP	-2.12941	0.88042	30.4238	1	1	0
SNAI2	NEO	TP	-2.05973	0.849939	36.4356	1	0	0
FHOD3	NEO	TP	-2.44383	0.626679	26.3501	1	1	1
PPP2CB	NEO	TP	-1.90168	0.941744	36.4356	1	0	0
SH3BGR	NEO	TP	-1.97195	0.561687	36.4356	1	0	0
EFNA1	NEO	TP	-1.68154	0.879335	48.131	1	0	0
PER2	NEO	TP	-2.09112	0.838263	36.4356	1	0	0
ACVR1	NEO	TP	-1.83418	0.930231	40.5786	1	0	0
RPL23AP32	NEO	TP	-2.16293	0.724926	30.4238	1	1	0
CCDC68	NEO	TP	-2.03178	0.398475	36.4356	1	0	0
SEMA3B	NEO	TP	-1.83196	0.58528	40.5786	1	0	0
COL1A1	NEO	TP	-1.81223	0.899447	40.5786	1	0	0
MLF1	NEO	TP	-2.05527	0.80405	36.4356	1	0	0
PRKG1	NEO	TP	-2.47578	0.775148	26.3501	1	1	1
CST3	NEO	TP	-1.93221	0.92902	36.4356	1	0	0
MAOB	NEO	TP	-2.2511	0.684982	30.4238	1	1	0
LOC283299	NEO	TP	-2.04945	0.391195	36.4356	1	1	0
NCMAP	NEO	TP	-1.96279	0.421129	36.4356	1	1	0
RASSF8	NEO	TP	-2.05126	0.879293	36.4356	1	0	0
PACRG	NEO	TP	-2.12886	0.385427	30.4238	1	1	0
AHNAK2	NEO	TP	-2.0641	0.719473	36.4356	1	0	0
ADAMTS16	NEO	TP	-1.84408	0.362376	40.5786	1	0	0
CNN1	NEO	TP	-2.79426	0.642623	20.8295	1	1	1
FAP	NEO	TP	-1.80762	0.858671	40.5786	1	0	0
SNX33	NEO	TP	-1.84794	0.86606	40.5786	1	0	0
TSPY26P	NEO	TP	-2.03679	0.688237	36.4356	1	0	0
TBCB	NEO	TP	-1.97913	0.931556	36.4356	1	0	0
GLIS2	NEO	TP	-2.30455	0.794535	30.4238	1	1	0
TSPAN31	NEO	TP	-1.99888	0.908711	36.4356	1	0	0
DDHD2	NEO	TP	-2.19853	0.902649	30.4238	1	1	0
EHHADH	NEO	TP	-2.71077	0.813941	20.8295	1	1	1
DCHS1	NEO	TP	-1.96477	0.793758	36.4356	1	0	0
WDR19	NEO	TP	-2.69376	0.83618	20.8295	1	1	1
COL3A1	NEO	TP	-1.75009	0.919351	44.366	1	0	0
NOMO3	NEO	TP	-1.8678	0.827415	40.5786	1	0	0
DCN	NEO	TP	-2.31385	0.886327	30.4238	1	1	0
CYTH3	NEO	TP	-1.82062	0.889337	40.5786	1	0	0
MT1F	NEO	TP	-1.72161	0.890942	44.366	1	0	0
SLC24A3	NEO	TP	-2.98966	0.695496	17.0037	1	1	1
C5orf15	NEO	TP	-1.70992	0.939729	44.366	1	0	0
RERG	NEO	TP	-2.10273	0.693758	36.4356	1	0	0
TMEM14A	NEO	TP	-1.88861	0.9224	36.4356	1	1	0
ST6GALNAC5	NEO	TP	-2.75545	0.720444	20.8295	1	1	1
DNM3OS	NEO	TP	-1.72643	0.804248	44.366	1	0	0
ELP3	NEO	TP	-2.04805	0.921792	36.4356	1	0	0
FAT4	NEO	TP	-2.43895	0.539267	26.3501	1	1	1
PLAT	NEO	TP	-2.06973	0.816173	36.4356	1	0	0
NPY1R	NEO	TP	-2.80026	0.37782	20.8295	1	1	1
MBOAT1	NEO	TP	-1.68529	0.859194	48.131	1	0	0
APC	NEO	TP	-2.22537	0.913547	30.4238	1	1	0
HCFC1R1	NEO	TP	-2.08975	0.893002	36.4356	1	0	0
ATP6V1B1	NEO	TP	-2.53845	0.544739	24.4853	1	1	1
NEGR1	NEO	TP	-2.0667	0.676809	36.4356	1	1	0
LUM	NEO	TP	-1.79379	0.912896	40.5786	1	0	0
WBP1L	NEO	TP	-1.85081	0.942606	40.5786	1	0	0
PODN	NEO	TP	-2.11514	0.7874	30.4238	1	1	0
KCND2	NEO	TP	-2.82078	0.294249	20.8295	1	1	1
GPR125	NEO	TP	-1.9685	0.834751	36.4356	1	0	0
C11orf63	NEO	TP	-2.11348	0.722446	30.4238	1	1	0
ATP10D	NEO	TP	-1.77014	0.885446	44.366	1	0	0
SH3PXD2A	NEO	TP	-1.88328	0.879483	40.5786	1	0	0
FKBP10	NEO	TP	-2.71497	0.885363	20.8295	1	1	1
CXCL12	NEO	TP	-1.81673	0.893005	40.5786	1	0	0
BCL2	NEO	TP	-1.74554	0.817376	44.366	1	0	0
ID4	NEO	TP	-2.26484	0.642923	30.4238	1	1	0
TCTN1	NEO	TP	-1.70428	0.899659	44.366	1	0	0
TMEM232	NEO	TP	-2.14809	0.495368	30.4238	1	1	0
PUM1	NEO	TP	-1.75006	0.960625	44.366	1	0	0
TMEM98	NEO	TP	-2.50944	0.794181	24.4853	1	1	1
CGNL1	NEO	TP	-1.78095	0.860247	44.366	1	0	0
AMOTL2	NEO	TP	-2.03951	0.829375	36.4356	1	0	0
ERCC4	NEO	TP	-1.70508	0.92985	44.366	1	0	0
PPP1R14A	NEO	TP	-1.70282	0.791995	44.366	1	0	0
PCOLCE	NEO	TP	-1.83783	0.900261	40.5786	1	0	0
FCGBP	NEO	TP	-2.54685	0.479379	24.4853	1	1	1
EPB41L2	NEO	TP	-1.78907	0.872048	40.5786	1	0	0
ARMC8	NEO	TP	-1.70659	0.960108	44.366	1	0	0
PER3	NEO	TP	-2.58025	0.783408	24.4853	1	1	1
MXRA5	NEO	TP	-1.97012	0.901637	36.4356	1	0	0
XPR1	NEO	TP	-1.96084	0.922816	36.4356	1	0	0
AGR3	NEO	TP	-1.71086	0.558318	44.366	1	0	0
VAMP3	NEO	TP	-2.07855	0.932644	36.4356	1	0	0
RRN3	NEO	TP	-2.27465	0.947695	30.4238	1	1	0
TMEM185A	NEO	TP	-1.85609	0.923165	40.5786	1	0	0
TCEAL4	NEO	TP	-2.15234	0.891437	30.4238	1	1	0
LTBP2	NEO	TP	-2.02309	0.848795	36.4356	1	1	0
ACTG2	NEO	TP	-2.25579	0.563907	30.4238	1	1	0
OVCH2	NEO	TP	-1.76769	0.319897	44.366	1	0	0
CALD1	NEO	TP	-2.04098	0.90033	36.4356	1	0	0
HMCN1	NEO	TP	-1.82736	0.766771	40.5786	1	0	0
SEC23A	NEO	TP	-2.70047	0.916352	20.8295	1	1	1
ZNF300	NEO	TP	-1.69608	0.788861	44.366	1	0	0
COL6A3	NEO	TP	-2.04516	0.788788	36.4356	1	0	0
KIAA0146	NEO	TP	-2.54561	0.912988	24.4853	1	1	1
XYLT1	NEO	TP	-2.7636	0.721391	20.8295	1	1	1
LRP6	NEO	TP	-1.74877	0.903598	44.366	1	0	0
GHDC	NEO	TP	-1.7875	0.835475	40.5786	1	0	0
MYOF	NEO	TP	-2.85433	0.892488	17.0037	1	1	1
PDGFRA	NEO	TP	-1.92471	0.871859	36.4356	1	0	0
DCAF6	NEO	TP	-2.20338	0.759794	30.4238	1	1	0
BICC1	NEO	TP	-2.16794	0.804043	30.4238	1	1	0
AHR	NEO	TP	-1.85109	0.915487	40.5786	1	0	0
ETV1	NEO	TP	-2.71975	0.714759	20.8295	1	1	1
NEK11	NEO	TP	-1.68997	0.859852	48.131	1	0	0
SDC4	NEO	TP	-1.74391	0.928318	44.366	1	0	0
RASAL2	NEO	TP	-2.49952	0.885839	24.4853	1	1	1
PDGFC	NEO	TP	-2.90545	0.862297	17.0037	1	1	1
SMAD3	NEO	TP	-1.82062	0.861899	40.5786	1	0	0
FOXP2	NEO	TP	-1.73691	0.512785	44.366	1	0	0
43710	NEO	TP	-1.97254	0.956177	36.4356	1	0	0
KIAA1328	NEO	TP	-1.71648	0.876371	44.366	1	0	0
MYH11	NEO	TP	-2.33621	0.60591	30.4238	1	1	0
MAGED2	NEO	TP	-1.85779	0.902098	40.5786	1	0	0
MYADM	NEO	TP	-1.73982	0.906995	44.366	1	0	0
SESTD1	NEO	TP	-2.10093	0.890091	36.4356	1	1	0
SOSTDC1	NEO	TP	-2.03583	0.510069	36.4356	1	1	0
TACSTD2	NEO	TP	-1.71373	0.847575	44.366	1	0	0
EP300	NEO	TP	-1.76604	0.922597	44.366	1	0	0
TEF	NEO	TP	-1.775	0.807823	44.366	1	0	0
FZD2	NEO	TP	-1.81133	0.798833	40.5786	1	0	0
ABCC5	NEO	TP	-1.79205	0.88809	40.5786	1	0	0
MTMR11	NEO	TP	-1.77546	0.871018	44.366	1	0	0
ANKRD18A	NEO	TP	-2.12032	0.370377	30.4238	1	1	0
ZNF214	NEO	TP	-2.47852	0.383563	26.3501	1	1	1
C16orf52	NEO	TP	-1.94999	0.928111	36.4356	1	0	0
POFUT1	NEO	TP	-1.86472	0.902473	40.5786	1	0	0
SGCD	NEO	TP	-2.29875	0.694452	30.4238	1	1	0
STEAP2	NEO	TP	-1.89317	0.872462	36.4356	1	0	0
MMP2	NEO	TP	-2.20632	0.86813	30.4238	1	1	0
SERPINB5	NEO	TP	-1.78167	0.658696	44.366	1	0	0
PDE5A	NEO	TP	-1.71658	0.768685	44.366	1	0	0
CLUAP1	NEO	TP	-2.96478	0.900317	17.0037	1	1	1
LMAN2L	NEO	TP	-1.74329	0.92928	44.366	1	0	0
NRAS	NEO	TP	-2.4299	0.913177	28.5306	1	1	1
LDLRAD4	NEO	TP	-1.87653	0.911063	40.5786	1	0	0
FAR1	NEO	TP	-2.06107	0.935736	36.4356	1	0	0
NEDD4L	NEO	TP	-2.24772	0.82999	30.4238	1	1	0
ARFGEF2	NEO	TP	-2.89269	0.915554	17.0037	1	1	1
TPM2	NEO	TP	-2.27315	0.873401	30.4238	1	1	0
CRISPLD2	NEO	TP	-2.0093	0.844076	36.4356	1	1	0
SRPX2	NEO	TP	-1.966	0.842565	36.4356	1	0	0
ZFHX4	NEO	TP	-2.61279	0.498244	21.6955	1	1	1
FNDC3A	NEO	TP	-2.24398	0.922873	30.4238	1	1	0
NET1	NEO	TP	-1.97993	0.910843	36.4356	1	0	0
SULF2	NEO	TP	-2.55702	0.841573	24.4853	1	1	1
MATN3	NEO	TP	-2.92127	0.554768	17.0037	1	1	1
UACA	NEO	TP	-2.11799	0.906757	30.4238	1	1	0
SMOC2	NEO	TP	-1.9424	0.817371	36.4356	1	1	0
IRS1	NEO	TP	-1.70309	0.852927	44.366	1	0	0
FNDC1	NEO	TP	-1.79449	0.737008	40.5786	1	0	0
PGM5P2	NEO	TP	-1.72104	0.471614	44.366	1	0	0
CCDC89	NEO	TP	-1.89952	0.716887	36.4356	1	1	0
SPAG9	NEO	TP	-2.25287	0.940656	30.4238	1	1	0
SLIT3	NEO	TP	-2.2058	0.739288	30.4238	1	1	0
ZNF568	NEO	TP	-2.04459	0.855944	36.4356	1	1	0
SGMS2	NEO	TP	-1.9638	0.855449	36.4356	1	0	0
LURAP1	NEO	TP	-2.29172	0.618958	30.4238	1	1	0
BMPR1B	NEO	TP	-3.05709	0.41516	17.0037	1	1	1
GBP3	NEO	TP	-1.70772	0.724785	44.366	1	0	0
RPL23AP82	NEO	TP	-1.69522	0.913819	44.366	1	0	0
FBXO3	NEO	TP	-1.72808	0.954612	44.366	1	0	0
PPP1R3B	NEO	TP	-1.68774	0.878129	48.131	1	0	0
MEIS3P1	NEO	TP	-2.01237	0.85967	36.4356	1	0	0
CCDC115	NEO	TP	-1.71239	0.932001	44.366	1	0	0
GALC	NEO	TP	-1.95903	0.911734	36.4356	1	0	0
DSG3	NEO	TP	-2.1695	0.151266	30.4238	1	1	0
AHSA2	NEO	TP	-1.87523	0.92167	40.5786	1	0	0
TBCK	NEO	TP	-1.94794	0.93808	36.4356	1	1	0
PDLIM4	NEO	TP	-2.703	0.696778	20.8295	1	1	1
ADARB1	NEO	TP	-1.98967	0.846705	36.4356	1	1	0
IGFBP6	NEO	TP	-1.80712	0.846421	40.5786	1	0	0
DOCK9	NEO	TP	-2.13343	0.908826	30.4238	1	1	0
BZRAP1	NEO	TP	-1.70176	0.800362	44.366	1	0	0
CPS1	NEO	TP	-1.87035	0.420566	40.5786	1	0	0
CPQ	NEO	TP	-1.99725	0.865982	36.4356	1	0	0
HYDIN	NEO	TP	-3.09295	0.614659	17.0037	1	1	1
BBS12	NEO	TP	-2.54815	0.820938	24.4853	1	1	1
RGS22	NEO	TP	-1.88152	0.388929	40.5786	1	0	0
TSPAN2	NEO	TP	-2.29724	0.645409	30.4238	1	1	0
SEMA3C	NEO	TP	-1.99289	0.869179	36.4356	1	0	0
CD109	NEO	TP	-3.02392	0.796872	17.0037	1	1	1
WFDC2	NEO	TP	-2.67978	0.649045	20.8295	1	1	1
FSTL1	NEO	TP	-1.80372	0.910392	40.5786	1	0	0
PDPN	NEO	TP	-1.7432	0.792976	44.366	1	0	0
FLJ45983	NEO	TP	-1.94956	0.13362	36.4356	1	0	0
PMP22	NEO	TP	-3.2914	0.857111	17.0037	1	1	1
IGIP	NEO	TP	-1.98088	0.87916	36.4356	1	0	0
PDGFRB	NEO	TP	-2.00735	0.862738	36.4356	1	1	0
LIF	NEO	TP	-1.99886	0.395064	36.4356	1	0	0
NOMO1	NEO	TP	-1.86283	0.931634	40.5786	1	0	0
AASS	NEO	TP	-1.93659	0.646062	36.4356	1	1	0
SCARF2	NEO	TP	-2.33117	0.694385	30.4238	1	1	0
IFT80	NEO	TP	-2.10901	0.926835	36.4356	1	0	0
RIN2	NEO	TP	-2.42929	0.904631	28.5306	1	1	0
C16orf45	NEO	TP	-1.73533	0.811679	44.366	1	0	0
JAZF1	NEO	TP	-1.83743	0.884807	40.5786	1	0	0
FGF2	NEO	TP	-2.04793	0.615408	36.4356	1	0	0
TRPC1	NEO	TP	-1.72569	0.805838	44.366	1	0	0
RARRES2	NEO	TP	-1.74723	0.910314	44.366	1	0	0
TSHZ3	NEO	TP	-2.0448	0.622037	36.4356	1	0	0
LINC00630	NEO	TP	-2.09123	0.83996	36.4356	1	0	0
SLC23A2	NEO	TP	-2.25813	0.866942	30.4238	1	1	0
CUL7	NEO	TP	-1.76362	0.906654	44.366	1	0	0
ZFP1	NEO	TP	-1.98998	0.918197	36.4356	1	0	0
SH3D19	NEO	TP	-1.84479	0.893149	40.5786	1	0	0
LTBP3	NEO	TP	-2.19458	0.914591	30.4238	1	1	0
TPM1	NEO	TP	-2.37917	0.898873	28.5306	1	1	0
MRVI1	NEO	TP	-2.29237	0.635822	30.4238	1	1	0
THBS1	NEO	TP	-1.79538	0.878785	40.5786	1	0	0
CREBL2	NEO	TP	-1.91656	0.917017	36.4356	1	1	0
ACTA2	NEO	TP	-2.57842	0.855816	24.4853	1	1	1
NCR3LG1	NEO	TP	-2.1175	0.539653	30.4238	1	1	0
BMPR2	NEO	TP	-1.9948	0.936553	36.4356	1	1	0
TRIM58	NEO	TP	-1.98882	0.197103	36.4356	1	0	0
DKK2	NEO	TP	-2.27876	0.55194	30.4238	1	1	0
EBF2	NEO	TP	-1.91716	0.432495	36.4356	1	0	0
SHISA4	NEO	TP	-3.01662	0.75339	17.0037	1	1	1
FAM109B	NEO	TP	-1.91922	0.869161	36.4356	1	0	0
QDPR	NEO	TP	-1.87057	0.871656	40.5786	1	0	0
TIMP2	NEO	TP	-2.03857	0.91332	36.4356	1	0	0
CPED1	NEO	TP	-1.83292	0.846896	40.5786	1	0	0
CLIP4	NEO	TP	-2.18403	0.8437	30.4238	1	1	0
COL1A2	NEO	TP	-1.84672	0.917316	40.5786	1	0	0
PRRX2	NEO	TP	-2.10797	0.802078	36.4356	1	0	0
AEBP1	NEO	TP	-1.96385	0.843838	36.4356	1	0	0
FKBP9	NEO	TP	-2.00212	0.915021	36.4356	1	1	0
BTBD3	NEO	TP	-1.96581	0.908416	36.4356	1	0	0
LRP1	NEO	TP	-2.37407	0.869262	28.5306	1	1	0
GAN	NEO	TP	-2.39801	0.89946	28.5306	1	1	0
SEC31A	NEO	TP	-1.83507	0.945414	40.5786	1	0	0
MID2	NEO	TP	-2.16352	0.855418	30.4238	1	1	0
HIPK3	NEO	TP	-2.75045	0.928704	20.8295	1	1	1
CHST15	NEO	TP	-2.57032	0.865224	24.4853	1	1	1
CLOCK	NEO	TP	-1.95187	0.953255	36.4356	1	1	0
WDFY3	NEO	TP	-2.45259	0.916715	26.3501	1	1	1
SLC22A15	NEO	TP	-2.09805	0.718515	36.4356	1	0	0
HSPB2	NEO	TP	-1.80275	0.655362	40.5786	1	0	0
SEMA6D	NEO	TP	-2.1399	0.448741	30.4238	1	1	0
SDK2	NEO	TP	-2.04463	0.396586	36.4356	1	0	0
FRY	NEO	TP	-1.74836	0.81966	44.366	1	0	0
TAPT1	NEO	TP	-1.88452	0.893965	40.5786	1	0	0
LEPREL1	NEO	TP	-2.33302	0.542857	30.4238	1	1	0
COL10A1	NEO	TP	-1.75883	0.776052	44.366	1	0	0
TRAF3IP1	NEO	TP	-1.92118	0.932064	36.4356	1	0	0
SSPN	NEO	TP	-2.55495	0.775413	24.4853	1	1	1
MOB1B	NEO	TP	-2.23413	0.928919	30.4238	1	1	0
COL15A1	NEO	TP	-1.83183	0.901242	40.5786	1	0	0
ZNF208	NEO	TP	-1.99251	0.778523	36.4356	1	0	0
C6orf89	NEO	TP	-1.87098	0.938847	40.5786	1	0	0
ARL4C	NEO	TP	-1.69833	0.885491	44.366	1	0	0
TAS2R43	NEO	TP	-1.72294	0.560642	44.366	1	0	0
GSTM2	NEO	TP	-3.13843	0.670803	17.0037	1	1	1
SLMAP	NEO	TP	-2.33472	0.893621	30.4238	1	1	0
NCAM1	NEO	TP	-1.80727	0.538569	40.5786	1	0	0
HKR1	NEO	TP	-2.188	0.840893	30.4238	1	1	0
KCTD9	NEO	TP	-1.78156	0.908247	44.366	1	0	0
FBXL7	NEO	TP	-2.03765	0.751763	36.4356	1	0	0
COL2A1	NEO	TP	-1.74984	0.200941	44.366	1	0	0
CETN2	NEO	TP	-1.73973	0.931377	44.366	1	0	0
TULP4	NEO	TP	-1.98714	0.826961	36.4356	1	0	0
COL17A1	NEO	TP	-2.10439	0.423534	36.4356	1	1	0
BAG4	NEO	TP	-1.90436	0.901225	36.4356	1	0	0
RASSF9	NEO	TP	-2.27938	0.475867	30.4238	1	1	0
PSD3	NEO	TP	-2.36022	0.786888	28.5306	1	1	0
DCTN6	NEO	TP	-2.03658	0.933746	36.4356	1	0	0
HOXA5	NEO	TP	-1.92117	0.655723	36.4356	1	1	0
DOCK4	NEO	TP	-1.90134	0.895658	36.4356	1	1	0
VSIG2	NEO	TP	-1.77049	0.341721	44.366	1	0	0
THBS2	NEO	TP	-2.02832	0.846972	36.4356	1	1	0
ST5	NEO	TP	-3.35994	0.660446	13.2629	1	1	1
C8orf4	NEO	TP	-2.06623	0.830498	36.4356	1	0	0
LOC349196	NEO	TP	-2.37768	0.496325	28.5306	1	1	0
PAM	NEO	TP	-2.10145	0.837061	36.4356	1	0	0
UGT2B15	NEO	TP	-1.97731	0.152616	36.4356	1	0	0
PARN	NEO	TP	-1.70391	0.968586	44.366	1	0	0
CC2D2A	NEO	TP	-2.82852	0.678275	20.8295	1	1	1
JAG1	NEO	TP	-3.06635	0.842008	17.0037	1	1	1
ZNRF2P1	NEO	TP	-2.36693	0.735175	28.5306	1	1	0
DFNA5	NEO	TP	-1.90439	0.78214	36.4356	1	0	0
TMEM139	NEO	TP	-2.27602	0.499262	30.4238	1	1	0
LEPROT	NEO	TP	-2.07227	0.930179	36.4356	1	0	0
PLEKHM3	NEO	TP	-1.81949	0.894991	40.5786	1	0	0
VIM	NEO	TP	-1.71274	0.96007	44.366	1	0	0
UBE2Q2	NEO	TP	-1.94545	0.919368	36.4356	1	0	0
ZNF484	NEO	TP	-2.07515	0.797091	36.4356	1	0	0
GPC1	NEO	TP	-1.81126	0.80683	40.5786	1	0	0
CSRNP3	NEO	TP	-1.72774	0.581234	44.366	1	0	0
FGF10	NEO	TP	-2.55405	0.401568	24.4853	1	1	1
PYGO1	NEO	TP	-2.57143	0.621189	24.4853	1	1	1
FAM198B	NEO	TP	-2.78076	0.844778	20.8295	1	1	1
TIMP3	NEO	TP	-2.90928	0.844361	17.0037	1	1	1
ATP6AP2	NEO	TP	-2.07085	0.948305	36.4356	1	1	0
HGSNAT	NEO	TP	-2.87351	0.874947	17.0037	1	1	1
DYNLT3	NEO	TP	-2.01252	0.898054	36.4356	1	0	0
SHC4	NEO	TP	-2.03296	0.239624	36.4356	1	0	0
RTN4	NEO	TP	-1.7755	0.95452	44.366	1	0	0
KLHDC5	NEO	TP	-1.96027	0.922036	36.4356	1	0	0
CRISPLD1	NEO	TP	-1.75876	0.739374	44.366	1	0	0
FCER1A	NEO	TP	-1.76075	0.614008	44.366	1	0	0
FAM5B	NEO	TP	-1.68494	0.153966	48.131	1	0	0
MYH10	NEO	TP	-3.33964	0.873944	13.2629	1	1	1
GLI3	NEO	TP	-1.7498	0.850267	44.366	1	0	0
TM9SF4	NEO	TP	-1.99295	0.930857	36.4356	1	0	0
SLC9A8	NEO	TP	-2.16082	0.883451	30.4238	1	1	0
MXRA7	NEO	TP	-1.98462	0.793843	36.4356	1	0	0
COL21A1	NEO	TP	-1.92512	0.524634	36.4356	1	0	0
SNUPN	NEO	TP	-1.76276	0.903182	44.366	1	0	0
MT1L	NEO	TP	-2.24335	0.700503	30.4238	1	1	0
CYP2U1	NEO	TP	-2.46829	0.795607	26.3501	1	1	1
GOSR1	NEO	TP	-1.82031	0.928067	40.5786	1	0	0
TRPS1	NEO	TP	-1.96681	0.923615	36.4356	1	1	0
AP1G1	NEO	TP	-1.92964	0.929746	36.4356	1	0	0
GLT8D2	NEO	TP	-1.70658	0.814953	44.366	1	0	0
EFEMP1	NEO	TP	-1.96631	0.864149	36.4356	1	0	0
TJP1	NEO	TP	-2.01606	0.865074	36.4356	1	0	0
DAAM2	NEO	TP	-2.18494	0.779769	30.4238	1	1	0
FAM189A2	NEO	TP	-1.89767	0.534466	36.4356	1	0	0
FAM155A	NEO	TP	-2.50609	0.290551	24.4853	1	1	1
LRCH3	NEO	TP	-1.72104	0.958433	44.366	1	0	0
LRP1B	NEO	TP	-2.01782	0.0527572	36.4356	1	1	0
ITGA11	NEO	TP	-1.79636	0.781175	40.5786	1	0	0
FAM3C	NEO	TP	-2.27822	0.93278	30.4238	1	1	0
TM4SF1	NEO	TP	-2.04004	0.886563	36.4356	1	0	0
ISM1	NEO	TP	-2.0165	0.673606	36.4356	1	0	0
TMEM30A	NEO	TP	-1.83582	0.946954	40.5786	1	0	0
EFNB1	NEO	TP	-1.92056	0.905842	36.4356	1	0	0
BTBD9	NEO	TP	-2.03308	0.913965	36.4356	1	0	0
ADD1	NEO	TP	-1.76082	0.911327	44.366	1	0	0
LEMD1	NEO	TP	-1.96103	0.0605055	36.4356	1	1	0
FST	NEO	TP	-2.47966	0.63035	26.3501	1	1	1
MGAM	NEO	TP	-1.83383	0.334648	40.5786	1	0	0
TMEM55A	NEO	TP	-1.79343	0.898833	40.5786	1	0	0
TF	NEO	TP	-3.05806	0.279461	17.0037	1	1	1
NBEA	NEO	TP	-1.74242	0.786153	44.366	1	0	0
BHLHE41	NEO	TP	-1.90554	0.877098	36.4356	1	1	0
FRS2	NEO	TP	-1.9508	0.905796	36.4356	1	0	0
ASCC1	NEO	TP	-1.86252	0.901165	40.5786	1	0	0
WWTR1	NEO	TP	-2.90264	0.840281	17.0037	1	1	1
KIT	NEO	TP	-2.43928	0.721879	26.3501	1	1	1
SGK3	NEO	TP	-1.71012	0.868315	44.366	1	0	0
KIAA0240	NEO	TP	-1.75072	0.919627	44.366	1	0	0
DPYSL3	NEO	TP	-1.9523	0.886973	36.4356	1	1	0
LMOD1	NEO	TP	-3.23576	0.573811	17.0037	1	1	1
TBC1D19	NEO	TP	-2.02863	0.839396	36.4356	1	0	0
ULK2	NEO	TP	-1.68878	0.935851	48.131	1	0	0
ZDHHC17	NEO	TP	-2.17823	0.914114	30.4238	1	1	0
PLA2R1	NEO	TP	-2.32045	0.775522	30.4238	1	1	0
MIA	NEO	TP	-2.72475	0.429961	20.8295	1	1	1
MANBAL	NEO	TP	-2.1943	0.919637	30.4238	1	1	0
LARP6	NEO	TP	-2.14699	0.707202	30.4238	1	1	0
CHPT1	NEO	TP	-2.27382	0.880864	30.4238	1	1	0
FAM102B	NEO	TP	-1.78759	0.921783	40.5786	1	0	0
ZNF732	NEO	TP	-2.68891	0.314482	20.8295	1	1	1
DSC3	NEO	TP	-2.12388	0.48974	30.4238	1	1	0
CLASP1	NEO	TP	-2.0974	0.935883	36.4356	1	0	0
TMPRSS3	NEO	TP	-1.83745	0.577721	40.5786	1	0	0
COL8A1	NEO	TP	-2.71454	0.779572	20.8295	1	1	1
TBX5	NEO	TP	-2.48597	0.319605	26.3501	1	1	1
IGFBP7	NEO	TP	-1.79728	0.923059	40.5786	1	0	0
CCL28	NEO	TP	-2.0124	0.618039	36.4356	1	0	0
LAMA2	NEO	TP	-1.70492	0.691933	44.366	1	0	0
PLXDC2	NEO	TP	-2.07255	0.88623	36.4356	1	0	0
MTR	NEO	TP	-1.85627	0.949688	40.5786	1	0	0
AKR1B1	NEO	TP	-1.81878	0.897088	40.5786	1	0	0
UBE2K	NEO	TP	-1.78541	0.956298	44.366	1	0	0
MYH14	NEO	TP	-1.8512	0.708289	40.5786	1	0	0
SOX10	NEO	TP	-1.71385	0.43711	44.366	1	0	0
DNALI1	NEO	TP	-2.2024	0.618354	30.4238	1	1	0
SLC9B2	NEO	TP	-2.12131	0.81093	30.4238	1	1	0
SULF1	NEO	TP	-2.294	0.874467	30.4238	1	1	0
MSRB3	NEO	TP	-2.85083	0.714249	17.0037	1	1	1
TNFRSF10D	NEO	TP	-1.81117	0.791597	40.5786	1	0	0
WDR7	NEO	TP	-2.12865	0.923852	30.4238	1	1	0
SPON1	NEO	TP	-2.06062	0.733708	36.4356	1	0	0
CDON	NEO	TP	-2.3662	0.730285	28.5306	1	1	0
ADAMTS5	NEO	TP	-1.85826	0.814855	40.5786	1	0	0
AGPAT6	NEO	TP	-2.01478	0.8941	36.4356	1	1	0
RAB31	NEO	TP	-2.26819	0.917111	30.4238	1	1	0
ARMCX2	NEO	TP	-4.17621	0.640803	0	1	1	1
APBB2	NEO	TP	-2.79899	0.842518	20.8295	1	1	1
MAB21L1	NEO	TP	-2.25685	0.387815	30.4238	1	1	0
SMAD4	NEO	TP	-1.89764	0.927563	36.4356	1	0	0
TCP11L2	NEO	TP	-1.95704	0.923335	36.4356	1	0	0
PCDHGB7	NEO	TP	-2.15545	0.540992	30.4238	1	1	0
DYRK3	NEO	TP	-1.95478	0.858829	36.4356	1	0	0
PTGER3	NEO	TP	-2.09032	0.694593	36.4356	1	1	0
GRAMD3	NEO	TP	-1.99166	0.869501	36.4356	1	0	0
COL12A1	NEO	TP	-1.97675	0.865066	36.4356	1	1	0
ISLR	NEO	TP	-1.82003	0.864671	40.5786	1	0	0
GPR34	NEO	TP	-2.94606	0.77005	17.0037	1	1	1
NNMT	NEO	TP	-1.79	0.885116	40.5786	1	0	0
LOXL1	NEO	TP	-1.75115	0.858429	44.366	1	0	0
NHS	NEO	TP	-1.94211	0.808478	36.4356	1	1	0
LOC654433	NEO	TP	-1.70301	0.614242	44.366	1	0	0
GSTT2	NEO	TP	-2.14763	0.525425	30.4238	1	1	0
NCOA2	NEO	TP	-1.88063	0.923337	40.5786	1	0	0
PKIG	NEO	TP	-2.22829	0.873088	30.4238	1	1	0
OLFML1	NEO	TP	-1.78333	0.846495	44.366	1	0	0
ATP1B1	NEO	TP	-1.98375	0.903303	36.4356	1	0	0
FAM149A	NEO	TP	-2.13912	0.594905	30.4238	1	1	0
ZNF204P	NEO	TP	-2.06875	0.697074	36.4356	1	0	0
FBLN1	NEO	TP	-2.55775	0.731828	24.4853	1	1	1
GABARAPL2	NEO	TP	-2.66292	0.941501	20.8295	1	1	1
DZIP1L	NEO	TP	-1.72993	0.765519	44.366	1	0	0
CTHRC1	NEO	TP	-2.4072	0.871691	28.5306	1	1	0
EPB41L1	NEO	TP	-1.8358	0.899782	40.5786	1	0	0
TK2	NEO	TP	-1.80932	0.915489	40.5786	1	0	0
VPS41	NEO	TP	-3.1121	0.912818	17.0037	1	1	1
FAM198A	NEO	TP	-1.72965	0.665035	44.366	1	0	0
SCARNA7	NEO	TP	-2.19609	0.956494	30.4238	1	1	0
PARVA	NEO	TP	-1.91941	0.871167	36.4356	1	0	0
OSCP1	NEO	TP	-1.70781	0.828049	44.366	1	0	0
IL17RD	NEO	TP	-2.32334	0.634344	30.4238	1	1	0
FRZB	NEO	TP	-1.91517	0.694267	36.4356	1	1	0
BRAF	NEO	TP	-1.81433	0.935816	40.5786	1	0	0
43719	NEO	TP	-2.386	0.91453	28.5306	1	1	0
ZSCAN18	NEO	TP	-2.36209	0.795313	28.5306	1	1	0
RUSC2	NEO	TP	-1.83006	0.814091	40.5786	1	0	0
SERPINA3	NEO	TP	-2.74823	0.732546	20.8295	1	1	1
ABHD4	NEO	TP	-1.9469	0.913342	36.4356	1	0	0
DUSP18	NEO	TP	-1.75516	0.895608	44.366	1	0	0
ZNF621	NEO	TP	-1.91449	0.875417	36.4356	1	0	0
PKD2	NEO	TP	-1.7709	0.886618	44.366	1	0	0
TNKS	NEO	TP	-1.94792	0.910198	36.4356	1	1	0
HDGFRP3	NEO	TP	-2.06746	0.902867	36.4356	1	0	0
IGFBP4	NEO	TP	-2.90115	0.866074	17.0037	1	1	1
PDZRN4	NEO	TP	-1.89695	0.170176	36.4356	1	0	0
KRT17	NEO	TP	-1.82371	0.736821	40.5786	1	0	0
DST	NEO	TP	-1.78004	0.88471	44.366	1	0	0
ARNTL	NEO	TP	-2.45385	0.894173	26.3501	1	1	1
PIFO	NEO	TP	-1.87341	0.598789	40.5786	1	0	0
KRT14	NEO	TP	-1.75634	0.719847	44.366	1	0	0
PLEKHB1	NEO	TP	-1.72409	0.808262	44.366	1	0	0
PHLDA1	NEO	TP	-1.88952	0.854862	36.4356	1	0	0
SBF2	NEO	TP	-2.36031	0.917216	28.5306	1	1	0
CCDC88A	NEO	TP	-1.98683	0.86429	36.4356	1	0	0
HTRA3	NEO	TP	-2.65848	0.767239	20.8295	1	1	1
TRNP1	NEO	TP	-2.35634	0.547427	28.5306	1	1	0
NRN1	NEO	TP	-1.98356	0.79724	36.4356	1	0	0
SERPINB2	NEO	TP	-2.14525	0.0719932	30.4238	1	1	0
NFE2L1	NEO	TP	-1.97058	0.929629	36.4356	1	0	0
CPXM2	NEO	TP	-3.85186	0.716187	0	1	1	1
ZNF528	NEO	TP	-2.45147	0.703189	26.3501	1	1	1
NID1	NEO	TP	-1.8487	0.844159	40.5786	1	0	0
METTL24	NEO	TP	-2.10259	0.602132	36.4356	1	1	0
CYBRD1	NEO	TP	-1.98811	0.87939	36.4356	1	0	0
CHM	NEO	TP	-2.27875	0.907902	30.4238	1	1	0
SLC6A6	NEO	TP	-2.24553	0.91205	30.4238	1	1	0
PLSCR4	NEO	TP	-2.90334	0.782989	17.0037	1	1	1
TMEM178A	NEO	TP	-2.18704	0.120065	30.4238	1	1	0
CYSTM1	NEO	TP	-1.80107	0.920374	40.5786	1	0	0
PHF3	NEO	TP	-2.32003	0.921505	30.4238	1	1	0
FTO	NEO	TP	-2.04555	0.931087	36.4356	1	1	0
NCAM2	NEO	TP	-2.03176	0.423447	36.4356	1	1	0
PRKD1	NEO	TP	-1.91052	0.717414	36.4356	1	0	0
ATRN	NEO	TP	-1.88327	0.952301	40.5786	1	0	0
SCUBE2	NEO	TP	-1.7919	0.558868	40.5786	1	0	0
ZNF132	NEO	TP	-1.78456	0.710333	44.366	1	0	0
TPST1	NEO	TP	-2.84401	0.818201	17.0037	1	1	1
KIAA0232	NEO	TP	-2.40918	0.902984	28.5306	1	1	0
NRP2	NEO	TP	-1.97851	0.88134	36.4356	1	0	0
WNK1	NEO	TP	-2.10325	0.614519	36.4356	1	1	0
IBTK	NEO	TP	-2.48671	0.922824	26.3501	1	1	1
POLR2M	NEO	TP	-2.46868	0.929594	26.3501	1	1	1
CMTM3	NEO	TP	-1.73263	0.934362	44.366	1	0	0
DKK3	NEO	TP	-2.55859	0.756346	24.4853	1	1	1
PIEZO2	NEO	TP	-1.91897	0.737091	36.4356	1	0	0
SDR16C5	NEO	TP	-1.83562	0.495927	40.5786	1	0	0
CACNA2D1	NEO	TP	-2.38309	0.78983	28.5306	1	1	0
LAMC2	NEO	TP	-1.81596	0.689811	40.5786	1	0	0
LAMB1	NEO	TP	-1.69855	0.893426	44.366	1	0	0
PCSK6	NEO	TP	-2.3447	0.637658	28.5306	1	1	0
KIFAP3	NEO	TP	-2.771	0.878727	20.8295	1	1	1
NBPF1	NEO	TP	-1.70403	0.907117	44.366	1	0	0
PDLIM5	NEO	TP	-1.88314	0.932436	40.5786	1	0	0
SLC1A3	NEO	TP	-1.8869	0.889762	40.5786	1	0	0
PAH	NEO	TP	-1.85553	0.0680946	40.5786	1	0	0
TCTN3	NEO	TP	-2.18731	0.935931	30.4238	1	1	0
MTX3	NEO	TP	-1.68536	0.930884	48.131	1	0	0
GAS7	NEO	TP	-2.11769	0.888137	30.4238	1	1	0
A2M	NEO	TP	-1.85916	0.892792	40.5786	1	0	0
RAB11A	NEO	TP	-2.1279	0.956169	30.4238	1	1	0
SLC30A9	NEO	TP	-1.86043	0.946079	40.5786	1	0	0
NEXN	NEO	TP	-1.97144	0.808224	36.4356	1	0	0
C5orf4	NEO	TP	-2.22721	0.5873	30.4238	1	1	0
C16orf58	NEO	TP	-1.83358	0.923832	40.5786	1	0	0
CLIC4	NEO	TP	-2.02313	0.937623	36.4356	1	0	0
MPPED2	NEO	TP	-2.40562	0.275097	28.5306	1	1	0
SGCB	NEO	TP	-2.70176	0.881719	20.8295	1	1	1
KIAA0430	NEO	TP	-1.69654	0.933929	44.366	1	0	0
MAATS1	NEO	TP	-2.51816	0.333566	24.4853	1	1	1
AMIGO2	NEO	TP	-1.83092	0.741583	40.5786	1	0	0
ANTXR1	NEO	TP	-1.9078	0.823346	36.4356	1	0	0
SLC39A6	NEO	TP	-2.05515	0.804883	36.4356	1	0	0
FBLN7	NEO	TP	-2.32144	0.633799	30.4238	1	1	0
BNIP3L	NEO	TP	-1.69796	0.952319	44.366	1	0	0
DIRC2	NEO	TP	-2.21801	0.923671	30.4238	1	1	0
TCF12	NEO	TP	-2.05662	0.942295	36.4356	1	0	0
APOOL	NEO	TP	-1.79504	0.919696	40.5786	1	0	0
COX7A1	NEO	TP	-2.15137	0.746642	30.4238	1	1	0
GALNTL2	NEO	TP	-2.51554	0.446666	24.4853	1	1	1
DPP8	NEO	TP	-3.31267	0.91016	13.2629	1	1	1
SPOCK1	NEO	TP	-2.14507	0.742103	30.4238	1	1	0
DBNDD2	NEO	TP	-2.69091	0.868553	20.8295	1	1	1
ZNF559	NEO	TP	-2.40747	0.770341	28.5306	1	1	0
EIF2C4	NEO	TP	-2.71027	0.927618	20.8295	1	1	1
GPATCH8	NEO	TP	-2.14179	0.930751	30.4238	1	1	0
ALOX12P2	NEO	TP	-1.69582	0.483108	44.366	1	0	0
HMGN5	NEO	TP	-2.63879	0.40074	21.6955	1	1	1
LRRC49	NEO	TP	-3.59987	0.701058	13.2629	1	1	1
DYNC2H1	NEO	TP	-1.94247	0.863991	36.4356	1	0	0
FRYL	NEO	TP	-2.21351	0.935707	30.4238	1	1	0
HSPA12A	NEO	TP	-2.18843	0.592094	30.4238	1	1	0
IRS2	NEO	TP	-2.3391	0.723503	30.4238	1	1	0
MYL9	NEO	TP	-2.43248	0.840241	28.5306	1	1	0
LOC158376	NEO	TP	-1.76829	0.339694	44.366	1	0	0
MAP3K2	NEO	TP	-1.85274	0.954759	40.5786	1	0	0
MAP1A	NEO	TP	-2.3678	0.787946	28.5306	1	1	0
PPP1R12A	NEO	TP	-2.33633	0.899936	30.4238	1	1	0
EDIL3	NEO	TP	-2.08314	0.723775	36.4356	1	0	0
ZFYVE9	NEO	TP	-2.0069	0.840474	36.4356	1	1	0
C2orf40	NEO	TP	-2.3189	0.321609	30.4238	1	1	0
CGN	NEO	TP	-1.99154	0.651167	36.4356	1	0	0
TRO	NEO	TP	-2.43114	0.66619	28.5306	1	1	1
SLC26A2	NEO	TP	-2.5086	0.779461	24.4853	1	1	1
ZNF177	NEO	TP	-2.80606	0.754582	20.8295	1	1	1
LAMB2	NEO	TP	-2.84062	0.842063	17.0037	1	1	1
CTGF	NEO	TP	-3.04033	0.785599	17.0037	1	1	1
C11orf49	NEO	TP	-2.06032	0.903137	36.4356	1	0	0
SMPD1	NEO	TP	-1.84082	0.913654	40.5786	1	0	0
PDGFD	NEO	TP	-1.8901	0.715858	36.4356	1	1	0
PTPRM	NEO	TP	-1.93263	0.851662	36.4356	1	1	0
TMEM101	NEO	TP	-2.12455	0.856307	30.4238	1	1	0
ZNF793	NEO	TP	-2.34928	0.862339	28.5306	1	1	0
MANSC1	NEO	TP	-1.84401	0.889045	40.5786	1	0	0
MYO5A	NEO	TP	-2.28998	0.915779	30.4238	1	1	0
FN1	NEO	TP	-1.84402	0.877418	40.5786	1	0	0
APBB1	NEO	TP	-1.97761	0.848454	36.4356	1	0	0
CLIC6	NEO	TP	-1.73331	0.616171	44.366	1	0	0
ZFPM2	NEO	TP	-2.61687	0.65329	21.6955	1	1	1
DOCK1	NEO	TP	-2.56613	0.881313	24.4853	1	1	1
MBOAT2	NEO	TP	-2.0765	0.8648	36.4356	1	0	0
BCL6	NEO	TP	-1.85335	0.916891	40.5786	1	0	0
ITGA9	NEO	TP	-2.05788	0.817276	36.4356	1	0	0
OCIAD1	NEO	TP	-1.98922	0.941093	36.4356	1	1	0
NAGS	NEO	TP	-1.76172	0.68057	44.366	1	0	0
PTPRG	NEO	TP	-2.14516	0.856983	30.4238	1	1	0
PPP3CA	NEO	TP	-2.11944	0.897522	30.4238	1	1	0
BPIFB1	NEO	TP	-1.81164	0.283793	40.5786	1	0	0
CMYA5	NEO	TP	-1.78014	0.640747	44.366	1	0	0
NPIP	NEO	TP	-2.13533	0.570818	30.4238	1	1	0
TEAD1	NEO	TP	-2.09721	0.870707	36.4356	1	1	0
COPZ2	NEO	TP	-1.9499	0.772416	36.4356	1	0	0
TLR5	NEO	TP	-1.8907	0.783378	36.4356	1	1	0
DMD	NEO	TP	-2.58713	0.409222	21.6955	1	1	1
DYNC1LI2	NEO	TP	-1.86285	0.903688	40.5786	1	0	0
HSPA2	NEO	TP	-2.10054	0.751749	36.4356	1	0	0
GNPTG	NEO	TP	-1.98827	0.940865	36.4356	1	1	0
APOD	NEO	TP	-2.13379	0.771923	30.4238	1	1	0
NPHP1	NEO	TP	-1.95865	0.733341	36.4356	1	0	0
ARHGEF40	NEO	TP	-2.05715	0.794345	36.4356	1	1	0
KAT6A	NEO	TP	-3.05127	0.822749	17.0037	1	1	1
PIGG	NEO	TP	-1.95728	0.92361	36.4356	1	0	0
PARD3B	NEO	TP	-1.84346	0.874681	40.5786	1	0	0
RPS6KA2	NEO	TP	-2.29244	0.823069	30.4238	1	1	0
SEMA3D	NEO	TP	-1.72985	0.591625	44.366	1	0	0
TAOK1	NEO	TP	-1.82681	0.956251	40.5786	1	0	0
CAV1	NEO	TP	-1.76475	0.474881	44.366	1	0	0
DLC1	NEO	TP	-2.66749	0.802671	20.8295	1	1	1
RECK	NEO	TP	-2.20384	0.763188	30.4238	1	1	0
VSTM4	NEO	TP	-1.9577	0.746801	36.4356	1	0	0
MRC2	NEO	TP	-2.21863	0.859813	30.4238	1	1	0
SUV420H1	NEO	TP	-2.00533	0.955074	36.4356	1	0	0
LOC644554	NEO	TP	-3.426	0.336615	13.2629	1	1	1
NFAT5	NEO	TP	-2.47992	0.913076	26.3501	1	1	1
ZNF585A	NEO	TP	-2.12587	0.909629	30.4238	1	1	0
BBS1	NEO	TP	-1.70593	0.868002	44.366	1	0	0
SLIT2	NEO	TP	-1.95077	0.790261	36.4356	1	1	0
BBS9	NEO	TP	-2.76764	0.879907	20.8295	1	1	1
ITGB3	NEO	TP	-2.12381	0.686562	30.4238	1	1	0
ISPD	NEO	TP	-2.49263	0.675563	26.3501	1	1	1
MYO9A	NEO	TP	-2.84086	0.910824	17.0037	1	1	1
CLN8	NEO	TP	-1.74479	0.888599	44.366	1	0	0
PAQR7	NEO	TP	-1.71423	0.861833	44.366	1	0	0
FHL2	NEO	TP	-2.09957	0.849067	36.4356	1	0	0
MOCS1	NEO	TP	-1.68279	0.794148	48.131	1	0	0
HMBOX1	NEO	TP	-2.14517	0.857605	30.4238	1	1	0
WNK3	NEO	TP	-2.35413	0.370052	28.5306	1	1	0
TAGLN	NEO	TP	-2.71722	0.838534	20.8295	1	1	1
RGN	NEO	TP	-1.86354	0.382201	40.5786	1	0	0
SLC18A2	NEO	TP	-1.88911	0.400604	36.4356	1	0	0
CTNND1	NEO	TP	-1.84351	0.898535	40.5786	1	0	0
LIMS2	NEO	TP	-2.65697	0.674918	20.8295	1	1	1
GLT8D1	NEO	TP	-1.93755	0.945878	36.4356	1	1	0
DCDC2	NEO	TP	-2.40911	0.300198	28.5306	1	1	0
LOC100506990	NEO	TP	-1.97698	0.696281	36.4356	1	0	0
HSF2BP	NEO	TP	-2.04782	0.698353	36.4356	1	0	0
WBP5	NEO	TP	-2.27284	0.81222	30.4238	1	1	0
TMEM117	NEO	TP	-2.02988	0.869839	36.4356	1	0	0
ICK	NEO	TP	-1.8736	0.918858	40.5786	1	0	0
FIBIN	NEO	TP	-3.21913	0.697288	17.0037	1	1	1
NOX4	NEO	TP	-1.73013	0.830323	44.366	1	0	0
GAS1	NEO	TP	-2.17788	0.825959	30.4238	1	1	0
KRT6B	NEO	TP	-2.60353	0.334556	21.6955	1	1	1
PHC3	NEO	TP	-1.84344	0.914402	40.5786	1	0	0
ITGBL1	NEO	TP	-2.35252	0.774633	28.5306	1	1	0
EDARADD	NEO	TP	-1.88758	0.640683	40.5786	1	0	0
MACF1	NEO	TP	-1.82515	0.946202	40.5786	1	0	0
CCND1	NEO	TP	-3.02356	0.816174	17.0037	1	1	1
ELP2	NEO	TP	-1.7298	0.866606	44.366	1	0	0
CHD9	NEO	TP	-1.68477	0.92939	48.131	1	0	0
PRELP	NEO	TP	-1.72915	0.765191	44.366	1	0	0
C14orf37	NEO	TP	-1.82364	0.668221	40.5786	1	0	0
GPAT2	NEO	TP	-1.70747	0.490982	44.366	1	0	0
FBN1	NEO	TP	-2.11041	0.856532	30.4238	1	1	0
CP	NEO	TP	-1.6957	0.704949	44.366	1	0	0
KRTCAP3	NEO	TP	-1.69532	0.742988	44.366	1	0	0
MYZAP	NEO	TP	-2.68403	0.363862	20.8295	1	1	1
NPR2	NEO	TP	-2.94828	0.72366	17.0037	1	1	1
RIMS1	NEO	TP	-2.66433	0.561723	20.8295	1	1	1
MAP2K5	NEO	TP	-1.69631	0.918395	44.366	1	0	0
GSTA1	NEO	TP	-1.88053	0.262213	40.5786	1	0	0
PODNL1	NEO	TP	-1.82466	0.707877	40.5786	1	0	0
MDH1B	NEO	TP	-2.00214	0.582007	36.4356	1	0	0
TMEM231	NEO	TP	-2.02046	0.78815	36.4356	1	0	0
JPH2	NEO	TP	-1.79182	0.348118	40.5786	1	0	0
BAIAP3	NEO	TP	-1.75199	0.189124	44.366	1	0	0
VDAC3	NEO	TP	-1.81117	0.923308	40.5786	1	0	0
PRDM5	NEO	TP	-1.78712	0.727558	40.5786	1	0	0
ZNF429	NEO	TP	-1.8338	0.90544	40.5786	1	0	0
LEPREL2	NEO	TP	-1.79835	0.801823	40.5786	1	0	0
ZNF333	NEO	TP	-1.95007	0.902523	36.4356	1	0	0
MYO1E	NEO	TP	-2.07369	0.901339	36.4356	1	0	0
EHD2	NEO	TP	-1.88609	0.840774	40.5786	1	0	0
MKL2	NEO	TP	-1.75022	0.864064	44.366	1	0	0
MIR548I1	NEO	TP	-1.77218	0.761726	44.366	1	0	0
ZNF187	NEO	TP	-1.91932	0.911744	36.4356	1	1	0
GOLIM4	NEO	TP	-2.29874	0.884306	30.4238	1	1	0
LPP	NEO	TP	-1.94148	0.896273	36.4356	1	0	0
SNCA	NEO	TP	-2.18299	0.742083	30.4238	1	1	0
ZMAT4	NEO	TP	-2.19227	0.0416346	30.4238	1	1	0
HTR2A	NEO	TP	-1.76372	0.335153	44.366	1	0	0
ACOX2	NEO	TP	-1.99569	0.567384	36.4356	1	0	0
PRKAB2	NEO	TP	-1.85364	0.88832	40.5786	1	0	0
VCAN	NEO	TP	-1.77943	0.879327	44.366	1	0	0
SLC20A2	NEO	TP	-3.11764	0.781038	17.0037	1	1	1
PIAS1	NEO	TP	-1.9721	0.942265	36.4356	1	0	0
LOC401321	NEO	TP	-3.07939	0.65127	17.0037	1	1	1
PCNXL2	NEO	TP	-2.53025	0.908494	24.4853	1	1	1
ELOVL2	NEO	TP	-1.85846	0.596721	40.5786	1	0	0
TTC17	NEO	TP	-1.70184	0.956233	44.366	1	0	0
MARVELD1	NEO	TP	-3.09996	0.840651	17.0037	1	1	1
PTPDC1	NEO	TP	-1.71008	0.876523	44.366	1	0	0
IGF1R	NEO	TP	-4.13581	0.747273	0	1	1	1
SFRP4	NEO	TP	-1.89683	0.824262	36.4356	1	0	0
TMTC3	NEO	TP	-1.82101	0.931226	40.5786	1	0	0
RIC3	NEO	TP	-1.89275	0.40218	36.4356	1	0	0
MTMR6	NEO	TP	-1.87075	0.93039	40.5786	1	0	0
FGF1	NEO	TP	-1.74129	0.686211	44.366	1	0	0
ARHGAP6	NEO	TP	-1.83213	0.558918	40.5786	1	0	0
DDR2	NEO	TP	-2.10071	0.830588	36.4356	1	1	0
NUAK1	NEO	TP	-2.84713	0.792676	17.0037	1	1	1
MFAP5	NEO	TP	-2.25893	0.757139	30.4238	1	1	0
GAS6	NEO	TP	-1.85102	0.870319	40.5786	1	0	0
IKBKB	NEO	TP	-2.16118	0.887976	30.4238	1	1	0
TMEM204	NEO	TP	-1.97504	0.874888	36.4356	1	0	0
DPY19L1	NEO	TP	-1.90219	0.888331	36.4356	1	0	0
ZMAT3	NEO	TP	-2.54161	0.848666	24.4853	1	1	1
S100A4	NEO	TP	-2.05421	0.902731	36.4356	1	0	0
SERTAD4-AS1	NEO	TP	-1.73053	0.757252	44.366	1	0	0
CDH11	NEO	TP	-2.25455	0.868087	30.4238	1	1	0
MYBPC1	NEO	TP	-2.05706	0.112239	36.4356	1	0	0
RCN3	NEO	TP	-1.78984	0.903393	40.5786	1	0	0
KGFLP2	NEO	TP	-1.79076	0.630679	40.5786	1	0	0
NYNRIN	NEO	TP	-2.26058	0.715038	30.4238	1	1	0
FAM175A	NEO	T2	1.49512	1.17475	34.8964	1	1	1
MITF	NEO	T2	2.54844	1.26238	34.8964	1	1	1
ERP44	NEO	T2	1.5609	1.07078	34.8964	1	1	0
CLECL1	NEO	T2	1.8334	2.6368	34.8964	1	1	1
ARHGAP6	NEO	T2	1.51657	1.43468	34.8964	1	0	0
LYST	NEO	T2	1.96982	1.15833	34.8964	1	0	0
ATP8A1	NEO	T2	1.60367	1.33341	34.8964	1	1	0
LRRC58	NEO	T2	1.7218	1.19277	34.8964	1	1	1
FGFR1OP2	NEO	T2	1.59465	1.14626	34.8964	1	0	0
TFEC	NEO	T2	1.7629	1.26191	34.8964	1	1	1
EXTL2	NEO	T2	1.89456	1.19749	34.8964	1	0	0
CASP3	NEO	T2	1.54714	1.11778	34.8964	1	0	0
RAD50	NEO	T2	1.63575	1.15516	34.8964	1	0	0
KIAA1033	NEO	T2	2.16219	1.21929	34.8964	1	1	0
IER5	NEO	T2	1.54453	1.1073	34.8964	1	1	0
RSBN1	NEO	T2	1.61638	1.14817	34.8964	1	0	0
SIT1	NEO	T2	1.40049	1.47758	41.6041	1	0	0
DYRK4	NEO	T2	3.04662	2.55113	34.8964	1	0	0
ANKRD30B	NEO	T2	1.43792	73.6148	34.8964	1	1	1
FAIM3	NEO	T2	1.51926	1.43894	34.8964	1	1	0
TRAF3IP3	NEO	T2	1.74551	1.62022	34.8964	1	1	0
DES	NEO	T2	2.05245	3.99142	34.8964	1	0	0
ZNF226	NEO	T2	1.70054	1.27454	34.8964	1	0	0
DIAPH2	NEO	T2	1.94535	1.27407	34.8964	1	1	0
GIN1	NEO	T2	1.72366	1.39562	34.8964	1	0	0
SRGN	NEO	T2	1.61343	1.13911	34.8964	1	1	1
NFYB	NEO	T2	1.62879	1.11149	34.8964	1	0	0
CWF19L2	NEO	T2	1.4887	1.10763	34.8964	1	0	0
ANAPC4	NEO	T2	1.86591	1.17871	34.8964	1	1	0
ARHGAP42	NEO	T2	1.62197	1.21472	34.8964	1	0	0
ZDHHC2	NEO	T2	2.22863	1.21849	34.8964	1	0	0
SMPDL3A	NEO	T2	2.74292	1.91323	34.8964	1	1	0
MS4A4A	NEO	T2	2.20475	1.2582	34.8964	1	1	0
SLU7	NEO	T2	1.49381	1.07127	34.8964	1	1	0
ZNF563	NEO	T2	1.71778	1.3116	34.8964	1	1	0
ZNF701	NEO	T2	2.38901	1.42071	34.8964	1	0	0
PIP5K1B	NEO	T2	1.83386	2.29863	34.8964	1	1	0
USP16	NEO	T2	1.41351	1.08072	34.8964	1	1	1
FCRL6	NEO	T2	1.6244	2.01653	34.8964	1	1	1
PARP15	NEO	T2	2.19267	1.49668	34.8964	1	0	0
CD177	NEO	T2	1.45528	5.92619	34.8964	1	1	0
ANKRD36BP2	NEO	T2	1.41967	2.08372	34.8964	1	1	0
GPR174	NEO	T2	1.69141	1.38411	34.8964	1	0	0
HBA2	NEO	T2	1.46271	1.23541	34.8964	1	0	0
GNPAT	NEO	T2	1.53464	1.16977	34.8964	1	0	0
BTBD8	NEO	T2	2.00778	1.47613	34.8964	1	0	0
NAP1L5	NEO	T2	1.84131	1.86697	34.8964	1	0	0
FYN	NEO	T2	1.49669	1.29012	34.8964	1	0	0
HSPA4	NEO	T2	1.47144	1.06685	34.8964	1	0	0
SLC16A9	NEO	T2	2.27901	3.79264	34.8964	1	0	0
RLF	NEO	T2	1.518	1.12208	34.8964	1	1	0
CD226	NEO	T2	1.43156	1.26493	34.8964	1	0	0
RGN	NEO	T2	1.71545	2.29621	34.8964	1	1	1
PLK1S1	NEO	T2	1.76641	1.16575	34.8964	1	0	0
FBXO10	NEO	T2	1.83509	1.30267	34.8964	1	0	0
TCEANC2	NEO	T2	1.46393	1.27472	34.8964	1	1	0
STARD4	NEO	T2	1.51412	1.28222	34.8964	1	1	1
HELQ	NEO	T2	2.31581	1.28281	34.8964	1	1	1
APOC1	NEO	T2	2.16583	1.24303	34.8964	1	1	0
RPS26	NEO	T2	1.47504	1.08614	34.8964	1	0	0
ZMYM5	NEO	T2	1.88147	1.23692	34.8964	1	1	1
DEPDC7	NEO	T2	1.7706	1.52935	34.8964	1	1	1
LGMN	NEO	T2	1.79833	1.12251	34.8964	1	0	0
43709	NEO	T2	1.45959	1.60041	34.8964	1	0	0
RAB32	NEO	T2	1.48736	1.14124	34.8964	1	1	1
CCDC112	NEO	T2	1.84716	1.58649	34.8964	1	1	0
AMN1	NEO	T2	1.43985	1.31826	34.8964	1	0	0
CNRIP1	NEO	T2	1.66582	1.25711	34.8964	1	0	0
HSD17B4	NEO	T2	1.87899	1.09683	34.8964	1	0	0
LOC100270804	NEO	T2	1.44363	1.30402	34.8964	1	1	0
ZNF430	NEO	T2	1.43393	1.1065	34.8964	1	1	1
UBE4A	NEO	T2	1.64082	1.1825	34.8964	1	1	1
ENO3	NEO	T2	1.40433	1.93602	34.8964	1	1	0
BTN2A2	NEO	T2	1.47098	1.21135	34.8964	1	0	0
CXCR6	NEO	T2	2.64449	2.1153	34.8964	1	1	0
TAS2R19	NEO	T2	2.31918	1.2994	34.8964	1	0	0
ANKRD29	NEO	T2	2.39204	1.62422	34.8964	1	0	0
C7orf23	NEO	T2	1.8723	1.4216	34.8964	1	0	0
HEXA	NEO	T2	1.46782	1.25077	34.8964	1	0	0
KIAA1432	NEO	T2	1.57479	1.09004	34.8964	1	0	0
ZNF624	NEO	T2	2.1707	1.36987	34.8964	1	0	0
RFTN2	NEO	T2	1.48392	1.34412	34.8964	1	0	0
SNORA74A	NEO	T2	1.48571	1.30802	34.8964	1	1	0
LAX1	NEO	T2	1.4314	1.52878	34.8964	1	0	0
TESC	NEO	T2	1.85808	2.2902	34.8964	1	1	0
FAM105A	NEO	T2	1.55856	1.2075	34.8964	1	0	0
TENM3	NEO	T2	1.41733	1.54412	34.8964	1	1	1
SEMA6D	NEO	T2	1.68719	1.93523	34.8964	1	0	0
PRKCE	NEO	T2	1.95317	1.26334	34.8964	1	0	0
SNORA74B	NEO	T2	1.76097	1.33677	34.8964	1	0	0
NCF1C	NEO	T2	1.46792	1.44786	34.8964	1	0	0
ACRBP	NEO	T2	2.27479	1.5728	34.8964	1	0	0
RGS13	NEO	T2	1.46191	2.47479	34.8964	1	1	1
EFHA2	NEO	T2	2.18523	2.18794	34.8964	1	0	0
CREG1	NEO	T2	2.19194	1.28198	34.8964	1	1	0
CREBRF	NEO	T2	2.10198	1.15051	34.8964	1	1	1
ZNF302	NEO	T2	1.74215	1.12071	34.8964	1	0	0
CLEC2B	NEO	T2	1.92969	1.12257	34.8964	1	0	0
STX2	NEO	T2	1.62479	1.31476	34.8964	1	1	0
HCFC2	NEO	T2	1.408	1.14059	34.8964	1	0	0
CD27	NEO	T2	1.52912	1.49421	34.8964	1	0	0
STAT4	NEO	T2	1.51443	1.43933	34.8964	1	0	0
DNAJC18	NEO	T2	1.61422	1.38193	34.8964	1	1	0
ZNF658	NEO	T2	1.82959	1.25412	34.8964	1	1	0
HEXB	NEO	T2	1.57934	1.11326	34.8964	1	1	0
CD200R1	NEO	T2	2.61847	2.23382	34.8964	1	0	0
SMC6	NEO	T2	1.69047	1.14979	34.8964	1	0	0
ATP5A1	NEO	T2	1.44645	1.07861	34.8964	1	1	0
MALT1	NEO	T2	2.00749	1.17521	34.8964	1	0	0
SLC18B1	NEO	T2	2.32655	1.2411	34.8964	1	0	0
ZFP106	NEO	T2	1.58038	1.09328	34.8964	1	0	0
TMEM38B	NEO	T2	2.13917	1.22213	34.8964	1	0	0
ATF1	NEO	T2	1.51183	1.10805	34.8964	1	0	0
SLAMF1	NEO	T2	1.54356	1.64289	34.8964	1	0	0
PIK3C2A	NEO	T2	1.72734	1.42649	34.8964	1	1	1
ZNF184	NEO	T2	2.21975	1.34864	34.8964	1	1	0
SLC35B3	NEO	T2	1.76069	1.16123	34.8964	1	1	0
WDR70	NEO	T2	1.60017	1.11525	34.8964	1	1	0
CLIC2	NEO	T2	1.91025	1.27546	34.8964	1	1	1
HOXD4	NEO	T2	1.64835	1.58736	34.8964	1	0	0
STAMBPL1	NEO	T2	1.96181	1.39751	34.8964	1	0	0
ZNF148	NEO	T2	1.43567	1.17152	34.8964	1	0	0
C7orf60	NEO	T2	1.61148	1.12408	34.8964	1	1	1
CECR1	NEO	T2	1.56187	1.18206	34.8964	1	0	0
BORA	NEO	T2	1.94352	1.39384	34.8964	1	1	0
ARL13B	NEO	T2	1.52071	1.14609	34.8964	1	0	0
PIK3R1	NEO	T2	1.4849	1.13147	34.8964	1	0	0
ANKRA2	NEO	T2	1.98804	1.17178	34.8964	1	1	0
BMP2K	NEO	T2	1.48293	1.07368	34.8964	1	1	0
CD2	NEO	T2	1.73489	1.42085	34.8964	1	0	0
ZRSR2	NEO	T2	1.57785	1.14303	34.8964	1	0	0
IPCEF1	NEO	T2	1.81353	1.54619	34.8964	1	0	0
CD300LF	NEO	T2	1.83048	1.9081	34.8964	1	0	0
SGMS1	NEO	T2	1.94797	1.1225	34.8964	1	1	1
CHRNA1	NEO	T2	2.35809	3.64451	34.8964	1	0	0
FCRL3	NEO	T2	1.76114	2.13163	34.8964	1	0	0
ZNF438	NEO	T2	2.36561	1.30205	34.8964	1	0	0
TRPC6	NEO	T2	1.93157	1.74492	34.8964	1	0	0
BTLA	NEO	T2	1.66662	1.89729	34.8964	1	1	0
BACH1	NEO	T2	1.61511	1.2163	34.8964	1	1	1
CXCL13	NEO	T2	2.11628	1.45398	34.8964	1	1	0
BCL10	NEO	T2	1.45908	1.1822	34.8964	1	0	0
CXorf21	NEO	T2	1.50609	1.25554	34.8964	1	0	0
CCDC136	NEO	T2	1.69799	2.98419	34.8964	1	0	0
ZFP3	NEO	T2	1.4218	1.1709	34.8964	1	0	0
TAS2R30	NEO	T2	1.90552	1.4146	34.8964	1	1	0
HTRA4	NEO	T2	1.41761	2.06501	34.8964	1	0	0
FAM105B	NEO	T2	1.81806	1.15288	34.8964	1	0	0
CBLB	NEO	T2	2.49378	1.20387	34.8964	1	0	0
P2RY10	NEO	T2	1.55202	1.43416	34.8964	1	1	0
CCDC102B	NEO	T2	2.09714	1.33797	34.8964	1	0	0
C14orf28	NEO	T2	1.90096	1.23002	34.8964	1	0	0
LRRC37A	NEO	T2	1.68432	1.245	34.8964	1	0	0
XRCC4	NEO	T2	1.45784	1.24354	34.8964	1	0	0
EFCAB7	NEO	T2	1.41732	1.2631	34.8964	1	0	0
C18orf21	NEO	T2	1.52638	1.13619	34.8964	1	1	0
NSL1	NEO	T2	1.48088	1.16208	34.8964	1	0	0
TRIM38	NEO	T2	1.45185	1.19342	34.8964	1	0	0
KIAA0586	NEO	T2	1.9029	1.30502	34.8964	1	0	0
SP100	NEO	T2	1.49793	1.16455	34.8964	1	1	0
ADI1	NEO	T2	1.87373	1.25764	34.8964	1	0	0
EPS15	NEO	T2	2.12904	1.12634	34.8964	1	0	0
SNORA1	NEO	T2	1.60453	1.27469	34.8964	1	1	0
TIGIT	NEO	T2	1.51607	1.47895	34.8964	1	0	0
NAPEPLD	NEO	T2	1.84765	1.20929	34.8964	1	1	0
SLC9A9	NEO	T2	1.8155	1.19959	34.8964	1	0	0
C1QC	NEO	T2	2.20866	1.16284	34.8964	1	0	0
CEP120	NEO	T2	1.44891	1.11337	34.8964	1	0	0
CTLA4	NEO	T2	1.47974	1.59785	34.8964	1	0	0
ATG3	NEO	T2	1.54464	1.08806	34.8964	1	1	0
LOC339803	NEO	T2	1.58115	1.18098	34.8964	1	1	0
SLC37A2	NEO	T2	1.61837	1.29929	34.8964	1	0	0
APBB1IP	NEO	T2	1.64102	1.23147	34.8964	1	1	0
RFXAP	NEO	T2	1.96797	1.61088	34.8964	1	0	0
BTN3A1	NEO	T2	1.93796	1.27098	34.8964	1	0	0
ZNF187	NEO	T2	1.59405	1.10883	34.8964	1	0	0
CD8A	NEO	T2	1.73243	1.3617	34.8964	1	1	0
SMG1P1	NEO	T2	1.54875	1.09535	34.8964	1	1	0
MAF	NEO	T2	1.5604	1.25744	34.8964	1	1	1
DCLRE1C	NEO	T2	1.48477	1.09684	34.8964	1	1	0
EPHB6	NEO	T2	1.48712	1.36166	34.8964	1	1	1
NNT	NEO	T2	1.66333	1.10547	34.8964	1	0	0
ZNF675	NEO	T2	1.45379	1.14185	34.8964	1	0	0
FKBP5	NEO	T2	1.77253	1.23297	34.8964	1	1	0
RNF130	NEO	T2	1.9979	1.10903	34.8964	1	1	0
RASGRF2	NEO	T2	1.95025	1.30588	34.8964	1	0	0
GIMAP2	NEO	T2	1.64936	1.23138	34.8964	1	1	1
TTC3P1	NEO	T2	1.58887	1.42094	34.8964	1	0	0
THAP6	NEO	T2	1.54809	1.18179	34.8964	1	1	1
TMEM117	NEO	T2	1.54764	1.18192	34.8964	1	1	0
PPP3CC	NEO	T2	1.79844	1.17999	34.8964	1	1	0
GRAP2	NEO	T2	1.50259	1.34857	34.8964	1	0	0
SKAP2	NEO	T2	1.45441	1.15139	34.8964	1	0	0
PTPLAD2	NEO	T2	1.55966	1.19831	34.8964	1	1	1
PDE1A	NEO	T2	1.47	1.63375	34.8964	1	1	0
NPC1	NEO	T2	1.41567	1.11732	34.8964	1	1	0
GSPT2	NEO	T2	1.9462	1.31292	34.8964	1	1	1
SP4	NEO	T2	1.47805	1.1833	34.8964	1	1	0
CLN5	NEO	T2	2.86491	1.14837	34.8964	1	1	0
SUPT3H	NEO	T2	1.61756	1.25248	34.8964	1	0	0
PARP11	NEO	T2	1.4897	1.15685	34.8964	1	0	0
JAK2	NEO	T2	1.51141	1.17939	34.8964	1	0	0
MR1	NEO	T2	1.54222	1.18822	34.8964	1	0	0
THEM4	NEO	T2	1.84374	1.36265	34.8964	1	0	0
OSTF1	NEO	T2	2.04888	1.108	34.8964	1	0	0
EPB41L3	NEO	T2	1.4353	1.1309	34.8964	1	0	0
LAG3	NEO	T2	1.76671	1.86168	34.8964	1	1	0
APOC2	NEO	T2	2.56994	1.46517	34.8964	1	0	0
SP3	NEO	T2	1.56182	1.27221	34.8964	1	1	0
FAM21A	NEO	T2	1.46665	1.10136	34.8964	1	1	1
LOC728743	NEO	T2	1.61802	1.28168	34.8964	1	1	0
PDE7B	NEO	T2	1.73444	1.75102	34.8964	1	1	0
LY86	NEO	T2	1.91374	1.23002	34.8964	1	0	0
PDCL	NEO	T2	1.67715	1.09588	34.8964	1	0	0
GPR65	NEO	T2	2.57923	1.2375	34.8964	1	1	0
GZMA	NEO	T2	1.71979	1.373	34.8964	1	1	0
LIPA	NEO	T2	1.82623	1.14296	34.8964	1	0	0
LOC254128	NEO	T2	1.64174	1.22233	34.8964	1	0	0
NIPSNAP3B	NEO	T2	1.62396	1.57815	34.8964	1	0	0
ACADM	NEO	T2	1.63385	1.23151	34.8964	1	0	0
ZNF300P1	NEO	T2	1.77222	2.54005	34.8964	1	1	0
NSMAF	NEO	T2	1.42725	1.1346	34.8964	1	1	0
TAS2R20	NEO	T2	2.00541	1.5709	34.8964	1	0	0
FAS	NEO	T2	1.72895	1.13948	34.8964	1	0	0
ARHGAP20	NEO	T2	1.43487	1.447	34.8964	1	0	0
HSPBAP1	NEO	T2	1.87728	1.1873	34.8964	1	0	0
PLCL2	NEO	T2	1.94827	1.50403	34.8964	1	1	0
CILP	NEO	T2	1.56357	1.34936	34.8964	1	0	0
MBIP	NEO	T2	1.94759	1.23681	34.8964	1	1	0
ARHGAP25	NEO	T2	1.4165	1.17909	34.8964	1	1	0
CYB5R4	NEO	T2	1.71018	1.24741	34.8964	1	1	0
ATP6V0D2	NEO	T2	1.52713	2.78601	34.8964	1	0	0
EXOC1	NEO	T2	1.56123	1.21295	34.8964	1	1	0
EML1	NEO	T2	1.4242	1.27878	34.8964	1	1	0
SCIMP	NEO	T2	1.56688	1.23534	34.8964	1	0	0
PTAFR	NEO	T2	1.52852	1.32925	34.8964	1	0	0
RIOK2	NEO	T2	2.03114	1.15267	34.8964	1	1	0
CD53	NEO	T2	1.49316	2.45124	34.8964	1	1	0
SESN1	NEO	T2	1.67278	1.23122	34.8964	1	0	0
CASP8	NEO	T2	1.63527	1.2537	34.8964	1	1	0
LRMP	NEO	T2	1.98586	1.32695	34.8964	1	1	0
PRF1	NEO	T2	1.99508	1.70614	34.8964	1	1	0
CD180	NEO	T2	1.62634	1.21336	34.8964	1	1	0
SNCAIP	NEO	T2	2.02742	1.8176	34.8964	1	0	0
INPP1	NEO	T2	1.469	1.20318	34.8964	1	1	1
CAMK4	NEO	T2	1.55195	1.43273	34.8964	1	0	0
RAD52	NEO	T2	1.47403	1.25201	34.8964	1	0	0
PSMC6	NEO	T2	1.47952	1.07211	34.8964	1	1	0
NAIP	NEO	T2	1.52349	1.18504	34.8964	1	0	0
NDNL2	NEO	T2	1.51422	1.12475	34.8964	1	1	0
ZNF654	NEO	T2	1.60751	1.1389	34.8964	1	0	0
LRRC37B	NEO	T2	1.58732	1.19742	34.8964	1	0	0
ABCD2	NEO	T2	2.09675	2.20907	34.8964	1	1	0
THEMIS	NEO	T2	1.98694	1.71418	34.8964	1	0	0
TBC1D23	NEO	T2	1.64358	1.08157	34.8964	1	0	0
LRRC28	NEO	T2	1.48922	1.17691	34.8964	1	0	0
P2RX7	NEO	T2	1.44268	1.19387	34.8964	1	0	0
MIER1	NEO	T2	2.20923	1.13502	34.8964	1	1	0
SPIC	NEO	T2	1.96911	3.7794	34.8964	1	1	0
ZFP37	NEO	T2	1.78586	1.28746	34.8964	1	0	0
SETDB2	NEO	T2	1.79217	1.17722	34.8964	1	0	0
CD244	NEO	T2	1.9989	2.06162	34.8964	1	0	0
RGL1	NEO	T2	1.42834	1.16062	34.8964	1	1	0
GUCY1B3	NEO	T2	1.4925	1.1487	34.8964	1	1	0
COL4A3BP	NEO	T2	1.55444	1.10236	34.8964	1	1	0
PLEK	NEO	T2	1.44649	1.2293	34.8964	1	0	0
RICTOR	NEO	T2	1.50675	1.10287	34.8964	1	1	0
ME1	NEO	T2	1.50027	1.25197	34.8964	1	1	0
GID4	NEO	T2	1.4535	1.13994	34.8964	1	0	0
PIGB	NEO	T2	1.98444	1.1757	34.8964	1	0	0
TRAPPC6B	NEO	T2	1.96834	1.16484	34.8964	1	1	1
NR2C1	NEO	T2	2.1228	1.39284	34.8964	1	0	0
SYN2	NEO	T2	1.5236	5.34321	34.8964	1	0	0
ARGLU1	NEO	T2	1.41919	1.09147	34.8964	1	0	0
RABGAP1L	NEO	T2	1.46117	1.18853	34.8964	1	0	0
ZNF83	NEO	T2	1.68499	1.45806	34.8964	1	0	0
TXK	NEO	T2	1.48866	1.7173	34.8964	1	1	1
LOC100335030	NEO	T2	1.50352	1.35683	34.8964	1	1	0
KDM4C	NEO	T2	2.14479	1.16411	34.8964	1	0	0
DENND4A	NEO	T2	1.44361	1.08851	34.8964	1	0	0
ZNF616	NEO	T2	1.50195	1.16862	34.8964	1	1	1
TDRD3	NEO	T2	2.14705	1.13979	34.8964	1	0	0
CFL2	NEO	T2	1.59437	1.17468	34.8964	1	1	1
ALG6	NEO	T2	1.73913	1.21133	34.8964	1	1	1
RECQL	NEO	T2	1.53437	1.09331	34.8964	1	1	0
FUT4	NEO	T2	1.59255	1.27104	34.8964	1	0	0
EPM2AIP1	NEO	T2	1.71578	1.41476	34.8964	1	1	0
CTBS	NEO	T2	1.98134	1.11189	34.8964	1	0	0
LOC257396	NEO	T2	1.80888	1.79411	34.8964	1	0	0
AIM2	NEO	T2	1.76178	1.80524	34.8964	1	1	1
PIGH	NEO	T2	1.48638	1.10126	34.8964	1	1	0
APOM	NEO	T2	1.64367	1.61056	34.8964	1	0	0
SLC35D2	NEO	T2	1.43942	1.15592	34.8964	1	0	0
ZCWPW2	NEO	T2	2.68039	1.54877	34.8964	1	0	0
SNTB1	NEO	T2	1.56467	1.22693	34.8964	1	0	0
KLRC2	NEO	T2	3.02118	3.88413	34.8964	1	0	0
KIAA1919	NEO	T2	1.43599	1.16207	34.8964	1	0	0
TNFSF13B	NEO	T2	1.4784	1.27594	34.8964	1	1	1
GRAMD1B	NEO	T2	1.52536	1.41225	34.8964	1	1	0
CLEC12A	NEO	T2	1.81885	1.99325	34.8964	1	1	1
CENPC1	NEO	T2	1.76418	1.35001	34.8964	1	1	1
UBE2D1	NEO	T2	1.82205	1.19892	34.8964	1	1	0
HTR2B	NEO	T2	1.51125	1.60304	34.8964	1	1	1
POP5	NEO	T2	1.62723	1.15861	34.8964	1	0	0
EVI2A	NEO	T2	2.13952	1.25802	34.8964	1	1	1
SYTL3	NEO	T2	1.80311	1.36902	34.8964	1	1	0
IL7	NEO	T2	3.06521	1.58149	34.8964	1	0	0
GPR137B	NEO	T2	1.53271	1.08271	34.8964	1	0	0
SUGT1	NEO	T2	1.53827	1.14012	34.8964	1	0	0
KBTBD8	NEO	T2	1.67453	1.66464	34.8964	1	1	1
CDH2	NEO	T2	2.32807	2.06867	34.8964	1	1	1
FAT4	NEO	T2	1.46524	1.47429	34.8964	1	1	0
DBP	NEO	T2	1.98966	1.65549	34.8964	1	0	0
FAM49A	NEO	T2	1.5808	1.15469	34.8964	1	0	0
LACC1	NEO	T2	1.45408	1.32515	34.8964	1	1	0
RGS18	NEO	T2	2.80066	1.75619	34.8964	1	0	0
PACRG	NEO	T2	1.47063	2.44148	34.8964	1	1	1
TMEFF1	NEO	T2	1.51246	1.29919	34.8964	1	0	0
FDXACB1	NEO	T2	1.57111	1.49134	34.8964	1	0	0
ISCA1	NEO	T2	1.43523	1.18997	34.8964	1	0	0
ZNF589	NEO	T2	1.72808	1.23421	34.8964	1	0	0
CDC37L1	NEO	T2	1.78581	1.20147	34.8964	1	0	0
KLRK1	NEO	T2	1.81079	1.35635	34.8964	1	1	0
SH3KBP1	NEO	T2	1.63342	1.21142	34.8964	1	1	0
WDR67	NEO	T2	1.77103	1.34998	34.8964	1	1	0
DENND1B	NEO	T2	1.43461	1.19206	34.8964	1	0	0
RNASEL	NEO	T2	2.65927	1.2097	34.8964	1	0	0
SMAP2	NEO	T2	1.56969	1.15603	34.8964	1	0	0
TMEM144	NEO	T2	1.98747	1.58875	34.8964	1	0	0
GTPBP8	NEO	T2	2.06705	1.27933	34.8964	1	0	0
ZIK1	NEO	T2	2.11764	1.42419	34.8964	1	1	0
SCP2	NEO	T2	1.67465	1.12143	34.8964	1	1	0
MDM2	NEO	T2	1.67094	1.13295	34.8964	1	1	0
FMO4	NEO	T2	2.00686	1.52795	34.8964	1	1	1
CTSS	NEO	T2	1.67459	1.15047	34.8964	1	0	0
EOMES	NEO	T2	1.66635	1.55219	34.8964	1	1	1
ZNF583	NEO	T2	1.45469	1.2054	34.8964	1	0	0
GZMK	NEO	T2	1.5877	1.37374	34.8964	1	0	0
ATP1A3	NEO	T2	1.43013	4.16204	34.8964	1	0	0
CLK1	NEO	T2	1.42536	1.08841	34.8964	1	1	0
NMNAT1	NEO	T2	1.66749	1.13054	34.8964	1	0	0
HMGN5	NEO	T2	1.71472	1.66772	34.8964	1	1	1
ATP6V1B2	NEO	T2	1.51813	1.11398	34.8964	1	0	0
LINC00649	NEO	T2	1.4186	1.54419	34.8964	1	1	0
CXCR2P1	NEO	T2	2.08177	2.03836	34.8964	1	0	0
GLA	NEO	T2	1.98104	1.13307	34.8964	1	1	0
LOC100129250	NEO	T2	1.45873	1.41401	34.8964	1	1	0
HSDL2	NEO	T2	1.40758	1.10048	34.8964	1	1	1
CD68	NEO	T2	1.82026	1.11182	34.8964	1	0	0
DYNC1LI1	NEO	T2	1.57898	1.12139	34.8964	1	0	0
PARP8	NEO	T2	1.41023	1.11742	34.8964	1	1	1
SDCBP	NEO	T2	1.49346	1.08444	34.8964	1	1	0
NAP1L3	NEO	T2	1.97366	1.65323	34.8964	1	1	0
FEM1C	NEO	T2	2.02446	1.17756	34.8964	1	1	0
ARL15	NEO	T2	1.41471	1.17468	34.8964	1	1	0
RELN	NEO	T2	1.42521	3.82239	34.8964	1	1	1
AP1S2	NEO	T2	1.74393	1.12897	34.8964	1	0	0
ATG4C	NEO	T2	2.05748	1.15719	34.8964	1	0	0
BEND6	NEO	T2	1.83014	1.64369	34.8964	1	0	0
LOC100507463	NEO	T2	1.83063	1.47896	34.8964	1	0	0
C3orf38	NEO	T2	1.42352	1.09456	34.8964	1	0	0
NCF1B	NEO	T2	1.44196	1.44508	34.8964	1	0	0
ZNF182	NEO	T2	1.49505	1.11926	34.8964	1	1	0
FUCA1	NEO	T2	1.57587	1.21487	34.8964	1	0	0
SAMD9L	NEO	T2	1.54028	1.26209	34.8964	1	0	0
GFI1	NEO	T2	1.50578	1.6512	34.8964	1	0	0
FAM125B	NEO	T2	1.44336	1.13745	34.8964	1	1	0
SLC40A1	NEO	T2	1.47953	1.23989	34.8964	1	1	1
SMEK1	NEO	T2	1.71441	1.16285	34.8964	1	0	0
B3GALTL	NEO	T2	1.9839	1.36356	34.8964	1	0	0
CCNG1	NEO	T2	1.45285	1.17944	34.8964	1	0	0
EEPD1	NEO	T2	1.4626	1.33398	34.8964	1	1	0
SLA	NEO	T2	1.46743	1.17674	34.8964	1	0	0
MYOM1	NEO	T2	1.6868	1.57983	34.8964	1	1	1
HERPUD2	NEO	T2	1.59594	1.09721	34.8964	1	0	0
CCDC28A	NEO	T2	1.59461	1.11902	34.8964	1	0	0
CEP85L	NEO	T2	1.79591	1.23697	34.8964	1	0	0
ABCG2	NEO	T2	1.44364	1.65636	34.8964	1	0	0
L3HYPDH	NEO	T2	1.99685	1.4712	34.8964	1	1	1
STON2	NEO	T2	2.24927	1.3955	34.8964	1	1	0
ING2	NEO	T2	1.45153	1.22925	34.8964	1	0	0
GADD45A	NEO	T2	1.68351	1.19893	34.8964	1	1	0
C1QB	NEO	T2	2.66716	1.16062	34.8964	1	1	1
PTPN2	NEO	T2	1.77333	1.16813	34.8964	1	1	1
PPHLN1	NEO	T2	1.52302	1.16095	34.8964	1	1	0
CCR5	NEO	T2	1.536	1.27611	34.8964	1	1	0
HPS5	NEO	T2	1.80749	1.11735	34.8964	1	0	0
WBP4	NEO	T2	1.69171	1.15527	34.8964	1	0	0
STIM2	NEO	T2	1.67512	1.29861	34.8964	1	0	0
CRTAM	NEO	T2	1.86223	2.04521	34.8964	1	0	0
GIMAP4	NEO	T2	1.63991	1.22735	34.8964	1	1	0
DKK1	NEO	T2	2.12849	11.3226	34.8964	1	0	0
ERI1	NEO	T2	1.54586	1.27454	34.8964	1	0	0
COG6	NEO	T2	1.57149	1.14084	34.8964	1	1	1
INTS10	NEO	T2	1.6969	1.14314	34.8964	1	0	0
DNASE2B	NEO	T2	1.94038	4.11047	34.8964	1	0	0
PTCHD4	NEO	T2	1.63491	1.90947	34.8964	1	1	1
TMEM220	NEO	T2	1.45065	1.29356	34.8964	1	0	0
EVI2B	NEO	T2	1.70742	1.25303	34.8964	1	1	1
ZNF879	NEO	T2	2.41577	1.51616	34.8964	1	0	0
SLAMF6	NEO	T2	2.18459	1.50689	34.8964	1	1	0
NRBF2	NEO	T2	1.43501	1.06731	34.8964	1	0	0
GTDC1	NEO	T2	1.41358	1.14449	34.8964	1	1	0
DMXL1	NEO	T2	1.69224	1.25836	34.8964	1	0	0
AGTPBP1	NEO	T2	1.79494	1.22556	34.8964	1	0	0
LRRK2	NEO	T2	1.56103	1.2271	34.8964	1	0	0
LPAR6	NEO	T2	1.81093	1.43924	34.8964	1	0	0
CD3G	NEO	T2	1.53384	1.32787	34.8964	1	0	0
CD69	NEO	T2	1.66078	1.36331	34.8964	1	1	0
FASLG	NEO	T2	1.86648	1.83029	34.8964	1	0	0
IFNG	NEO	T2	1.88771	3.72562	34.8964	1	0	0
PDZRN4	NEO	T2	1.86621	6.65719	34.8964	1	1	1
POLR3GL	NEO	T2	1.74064	1.1163	34.8964	1	0	0
ICOS	NEO	T2	1.5711	1.77625	34.8964	1	0	0
APOE	NEO	T2	1.44529	1.08847	34.8964	1	0	0
RAP1B	NEO	T2	1.59126	1.0703	34.8964	1	0	0
PDCD1	NEO	T2	2.04215	2.16203	34.8964	1	0	0
KCNJ5	NEO	T2	1.63198	1.36553	34.8964	1	1	1
SETMAR	NEO	T2	1.93966	1.56525	34.8964	1	1	1
RBPJ	NEO	T2	1.41228	1.06009	34.8964	1	0	0
ENTPD1	NEO	T2	2.2298	1.18376	34.8964	1	0	0
TATDN3	NEO	T2	1.63802	1.15281	34.8964	1	0	0
SQSTM1	NEO	T2	1.54303	1.07035	34.8964	1	1	0
ADHFE1	NEO	T2	1.49852	1.82961	34.8964	1	1	0
ZNF25	NEO	T2	1.90615	1.15574	34.8964	1	0	0
KDELC2	NEO	T2	1.84321	1.23968	34.8964	1	0	0
KIAA1551	NEO	T2	1.43123	1.17317	34.8964	1	1	0
HELZ	NEO	T2	1.41936	1.07813	34.8964	1	0	0
CRLF3	NEO	T2	1.87088	1.14458	34.8964	1	0	0
IKZF3	NEO	T2	1.70134	1.56596	34.8964	1	0	0
ITGAD	NEO	T2	1.90623	3.25016	34.8964	1	0	0
CD72	NEO	T2	2.43462	1.51321	34.8964	1	1	0
FLRT2	NEO	T2	1.49214	1.55753	34.8964	1	1	0
EIF4E3	NEO	T2	1.9592	1.16126	34.8964	1	0	0
HECTD2	NEO	T2	1.47812	1.21169	34.8964	1	1	0
COQ2	NEO	T2	1.41626	1.11427	34.8964	1	0	0
PTCH2	NEO	T2	1.70581	1.98917	34.8964	1	0	0
CMC1	NEO	T2	1.40266	1.36896	34.8964	1	0	0
LYRM5	NEO	T2	1.64712	1.64195	34.8964	1	0	0
HMOX1	NEO	T2	1.47373	1.15547	34.8964	1	0	0
HTR2A	NEO	T2	1.60971	2.57238	34.8964	1	1	0
CD8B	NEO	T2	1.58807	1.46355	34.8964	1	1	1
FNTA	NEO	T2	1.53627	1.09938	34.8964	1	0	0
MCPH1	NEO	T2	1.89092	1.19023	34.8964	1	1	0
CNOT7	NEO	T2	1.65944	1.10851	34.8964	1	0	0
KANSL1-AS1	NEO	T2	1.6872	1.29609	34.8964	1	0	0
CLEC2D	NEO	T2	1.81178	1.18686	34.8964	1	0	0
DHRS9	NEO	T2	2.11937	2.71129	34.8964	1	1	0
ZADH2	NEO	T2	2.36003	1.28817	34.8964	1	0	0
CUL5	NEO	T2	1.41622	1.19812	34.8964	1	0	0
ADAMTS6	NEO	T2	1.48291	1.24078	34.8964	1	1	0
CCDC82	NEO	T2	1.8196	1.35994	34.8964	1	0	0
TBX21	NEO	T2	1.47908	1.61181	34.8964	1	0	0
ARHGEF3	NEO	T2	1.48138	1.13681	34.8964	1	0	0
ZMYM6	NEO	T2	1.77443	1.11934	34.8964	1	0	0
ST8SIA4	NEO	T2	1.80191	1.23369	34.8964	1	0	0
RAB33B	NEO	T2	1.51902	1.0909	34.8964	1	1	0
DPP4	NEO	T2	1.80835	1.28461	34.8964	1	1	1
LPHN3	NEO	T2	2.61906	5.14474	34.8964	1	0	0
SCO1	NEO	T2	1.46521	1.14778	34.8964	1	0	0
C2orf43	NEO	T2	1.97876	1.17105	34.8964	1	1	0
ZMYND12	NEO	T2	1.94043	1.8021	34.8964	1	1	1
STXBP4	NEO	T2	1.41692	1.55138	34.8964	1	1	1
FAM118B	NEO	T2	1.41259	1.10243	34.8964	1	0	0
KIAA0825	NEO	T2	1.74645	1.3361	34.8964	1	1	0
ZSCAN12	NEO	T2	1.51251	1.14607	34.8964	1	1	1
IKBIP	NEO	T2	1.43667	1.18562	34.8964	1	1	0
ANKRD26	NEO	T2	1.42876	1.17901	34.8964	1	0	0
PPM1D	NEO	T2	1.9234	1.17829	34.8964	1	0	0
DDX26B	NEO	T2	1.5778	1.22681	34.8964	1	0	0
PPWD1	NEO	T2	1.5714	1.09418	34.8964	1	0	0
PCM1	NEO	T2	2.42945	1.17019	34.8964	1	1	1
HCST	NEO	T2	1.62403	1.20308	34.8964	1	1	0
KLRC1	NEO	T2	2.05173	2.20698	34.8964	1	0	0
CDK15	NEO	T2	1.42908	2.9644	34.8964	1	0	0
GIMAP5	NEO	T2	1.9218	1.3851	34.8964	1	0	0
FAM13B	NEO	T2	1.79018	1.13811	34.8964	1	0	0
IGSF6	NEO	T2	1.56365	1.2211	34.8964	1	0	0
CCR1	NEO	T2	1.9637	1.53116	34.8964	1	0	0
ZNF684	NEO	T2	2.02546	1.31303	34.8964	1	1	1
TAS2R31	NEO	T2	1.47821	1.55709	34.8964	1	0	0
DOCK11	NEO	T2	1.5345	1.15021	34.8964	1	1	0
PARD6G	NEO	T2	1.53421	1.39616	34.8964	1	0	0
GSTA4	NEO	T2	1.59736	1.30129	34.8964	1	1	0
PPAP2A	NEO	T2	1.57391	1.17475	34.8964	1	0	0
LPXN	NEO	T2	1.73028	1.38276	34.8964	1	1	1
MTM1	NEO	T2	2.17868	1.4463	34.8964	1	0	0
NAA16	NEO	T2	1.43061	1.11153	34.8964	1	1	1
SERPINA1	NEO	T2	1.49324	1.68781	34.8964	1	0	0
CD86	NEO	T2	1.51958	1.15277	34.8964	1	0	0
CCL5	NEO	T2	1.42286	1.20776	34.8964	1	1	1
EPC1	NEO	T2	1.50879	1.10186	34.8964	1	1	0
SCIN	NEO	T2	1.4123	1.59604	34.8964	1	1	0
FGL2	NEO	T2	1.70378	1.22217	34.8964	1	0	0
MCTS1	NEO	T2	1.77841	1.21848	34.8964	1	0	0
CENPK	NEO	T2	1.40943	1.71291	34.8964	1	0	0
NPL	NEO	T2	2.2365	1.23218	34.8964	1	1	0
C2orf42	NEO	T2	1.70692	1.1541	34.8964	1	1	1
TLR4	NEO	T2	2.85894	1.18712	34.8964	1	0	0
YOD1	NEO	T2	1.57322	1.22034	34.8964	1	0	0
R3HCC1L	NEO	T2	1.43911	1.11805	34.8964	1	0	0
CLK4	NEO	T2	2.34145	1.44509	34.8964	1	0	0
MAFB	NEO	T2	1.7257	1.19885	34.8964	1	0	0
GNLY	NEO	T2	1.45523	1.35034	34.8964	1	0	0
GVINP1	NEO	T2	1.5028	1.3223	34.8964	1	1	1
ARHGAP15	NEO	T2	1.44115	1.22373	34.8964	1	1	0
GTF2E2	NEO	T2	1.5986	1.16246	34.8964	1	1	0
MYO7A	NEO	T2	1.51798	1.33883	34.8964	1	1	0
MAPK6	NEO	T2	2.17869	1.23731	34.8964	1	1	0
NAAA	NEO	T2	1.75832	1.16738	34.8964	1	1	0
ABCB1	NEO	T2	1.51694	1.42064	34.8964	1	1	0
ZNF665	NEO	T2	1.61085	1.57463	34.8964	1	0	0
KLRC3	NEO	T2	1.78087	1.78164	34.8964	1	0	0
P2RX5	NEO	T2	1.68112	1.91763	34.8964	1	0	0
C1orf54	NEO	T2	1.48525	1.23602	34.8964	1	0	0
AMICA1	NEO	T2	1.82409	1.68358	34.8964	1	0	0
PUS3	NEO	T2	1.76445	1.43344	34.8964	1	0	0
PDCD1LG2	NEO	T2	1.57055	1.21813	34.8964	1	0	0
PDE3A	NEO	T2	2.23309	1.51637	34.8964	1	0	0
LOC220729	NEO	T2	2.00478	1.45918	34.8964	1	0	0
MBNL3	NEO	T2	1.68947	1.20413	34.8964	1	0	0
MIS18BP1	NEO	T2	2.05001	1.16008	34.8964	1	1	0
ITGB3BP	NEO	T2	1.75894	1.45485	34.8964	1	0	0
CD84	NEO	T2	1.85365	1.15288	34.8964	1	1	0
LY96	NEO	T2	2.00696	1.45743	34.8964	1	0	0
SCLT1	NEO	T2	1.75095	1.4897	34.8964	1	0	0
ELF4	NEO	T2	1.46556	1.15506	34.8964	1	1	1
ZNF502	NEO	T2	2.25996	1.44982	34.8964	1	0	0
ZNF235	NEO	T2	2.16743	1.47234	34.8964	1	0	0
GALM	NEO	T2	1.49181	1.2103	34.8964	1	1	1
DPEP2	NEO	T2	2.36808	1.48613	34.8964	1	0	0
TNFRSF10C	NEO	T2	2.55437	1.60952	34.8964	1	0	0
TMEM194B	NEO	T2	2.50388	1.50622	34.8964	1	0	0
GALC	NEO	T2	1.45482	1.12676	34.8964	1	0	0
P2RY1	NEO	T2	2.30098	1.72186	34.8964	1	0	0
RABEP1	NEO	T2	1.43385	1.17793	34.8964	1	0	0
HLA-DRB1	NEO	T2	1.5143	1.30923	34.8964	1	1	0
NUDT11	NEO	T2	1.48411	1.3562	34.8964	1	1	0
MYO5A	NEO	T2	1.5438	1.08391	34.8964	1	0	0
USP8	NEO	T2	1.44173	1.14187	34.8964	1	1	0
PPARG	NEO	T2	1.66078	1.2674	34.8964	1	1	1
NIN	NEO	T2	1.62476	1.13572	34.8964	1	1	0
HVCN1	NEO	T2	1.77359	1.39841	34.8964	1	1	0
ALDH1A1	NEO	T2	1.77783	1.28742	34.8964	1	1	1
ZC4H2	NEO	T2	1.55501	1.32927	34.8964	1	0	0
ARAP2	NEO	T2	1.61544	1.2094	34.8964	1	0	0
GIMAP6	NEO	T2	1.39879	1.15075	41.6041	1	0	0
RNF219	NEO	T2	1.50493	1.21089	34.8964	1	0	0
KLHL7	NEO	T2	2.05465	1.15794	34.8964	1	1	1
FAM70A	NEO	T2	2.01737	1.71454	34.8964	1	1	0
TAS2R14	NEO	T2	1.74077	1.21868	34.8964	1	1	0
RRAGD	NEO	T2	2.07547	1.24454	34.8964	1	0	0
PRR5L	NEO	T2	1.96185	1.28019	34.8964	1	0	0
C5	NEO	T2	1.93339	1.40728	34.8964	1	1	1
SHPRH	NEO	T2	1.58539	1.12748	34.8964	1	0	0
THAP2	NEO	T2	1.55426	1.20703	34.8964	1	0	0
ARID4A	NEO	T2	2.09849	1.12848	34.8964	1	0	0
ZNF569	NEO	T2	2.13065	1.19559	34.8964	1	1	1
ZNF215	NEO	T2	1.60368	1.36415	34.8964	1	1	0
EIF1B	NEO	T2	1.7975	1.0837	34.8964	1	1	0
EPHA3	NEO	T2	3.53699	2.53463	34.8964	1	0	0
[truncated: 7,869 more rows]

## Sheet: Supplementary Table 3
Differentially expressed genes between R/NR in NEO and I-SPY pre-treatment and on treatment.
Gene.Name	Dataset	Time	Score	Fold.Change	q.value...	FDR=10%	FDR=5%	FDR=1%
MRPS25	NEO	TP	3.78	1.26	22.86	1	0	0
FADS2	NEO	TP	3.73	1.3	22.86	1	0	0
SDHA	NEO	TP	3.66	1.11	22.86	1	0	0
HSPA14	NEO	TP	3.64	1.17	22.86	1	0	0
FCGR3B	NEO	TP	3.63	2.37	22.86	1	0	0
MRRF	NEO	TP	3.58	1.1	22.86	1	0	0
UBAC1	NEO	TP	3.58	1.16	22.86	1	0	0
C9orf142	NEO	TP	3.54	1.15	22.86	1	0	0
MRPS2	NEO	TP	3.53	1.15	22.86	1	0	0
QRSL1	NEO	TP	3.5	1.21	22.86	1	0	0
ABRACL	NEO	TP	3.45	1.14	30.49	1	0	0
EXOSC2	NEO	TP	3.44	1.11	30.49	1	0	0
ARMCX2	NEO	TP	-4.18	0.64	0	1	1	1
IGF1R	NEO	TP	-4.14	0.75	0	1	1	1
CPXM2	NEO	TP	-3.85	0.72	0	1	1	1
EXO1	I-SPY	TP	5.12	-2.17	7.8	1	0	0
AURKB	I-SPY	TP	4.73	-3.44	7.8	1	0	0
TFDP3	I-SPY	TP	4.56	-6.84	7.8	1	0	0
PLSCR1	I-SPY	TP	4.45	-5.1	7.8	1	0	0
CDCA7	I-SPY	TP	4.38	-1.96	7.8	1	0	0
MFI2	I-SPY	TP	4.25	-1.83	7.8	1	0	0
NASP	I-SPY	TP	4.14	-2.54	7.8	1	0	0
CDC7	I-SPY	TP	4.09	-5.69	7.8	1	0	0
OXSR1	I-SPY	TP	4.02	-1.72	7.8	1	0	0
CENPO	I-SPY	TP	3.95	-2.53	7.8	1	0	0
GABBR2	I-SPY	TP	3.95	-1.67	7.8	1	0	0
RHBDF2	I-SPY	TP	3.95	-6.27	7.8	1	0	0
B3GNT5	I-SPY	TP	3.89	-1.42	7.8	1	0	0
RAP2B	I-SPY	TP	3.86	-5.14	7.8	1	0	0
STK32C	I-SPY	TP	3.85	-3.62	7.8	1	0	0
PCOLCE2	I-SPY	TP	3.85	-0.89	7.8	1	0	0
GMNN	I-SPY	TP	3.83	-2.65	7.8	1	0	0
FAM105B	I-SPY	TP	3.82	-2.48	7.8	1	0	0
DEK	I-SPY	TP	3.81	-30.49	7.8	1	0	0
SOAT1	I-SPY	TP	3.81	-5.14	7.8	1	0	0
ARSB	I-SPY	TP	3.74	-4.18	7.8	1	0	0
ZIC1	I-SPY	TP	3.72	-2.25	7.8	1	0	0
RCCD1	I-SPY	TP	3.67	-2.22	7.8	1	0	0
WDR45L	I-SPY	TP	3.66	-4.27	7.8	1	0	0
LBR	I-SPY	TP	3.63	-5.89	7.8	1	0	0
SRPK3	I-SPY	TP	3.63	-1.02	7.8	1	0	0
LOC151009	I-SPY	TP	3.61	-4.24	7.8	1	0	0
PSME4	I-SPY	TP	3.58	-2.57	7.8	1	0	0
SNRPG	I-SPY	TP	3.54	-2.09	7.8	1	0	0
ZNF354C	I-SPY	TP	3.53	-4.73	7.8	1	0	0
MPP1	I-SPY	TP	3.52	-2.49	7.8	1	0	0
PAX6	I-SPY	TP	3.51	-2.69	7.8	1	0	0
NDC80	I-SPY	TP	3.51	-6.02	7.8	1	0	0
L3MBTL4	I-SPY	TP	3.51	-10.5	7.8	1	0	0
SEL1L3	I-SPY	TP	3.51	-3.86	7.8	1	0	0
ELOVL4	I-SPY	TP	3.5	-1.77	7.8	1	0	0
GPR137C	I-SPY	TP	3.5	-2.65	7.8	1	0	0
AQP5	I-SPY	TP	3.48	-1.13	7.8	1	0	0
RRP1	I-SPY	TP	3.48	-4.76	7.8	1	0	0
IFIH1	I-SPY	TP	3.47	-14.35	7.8	1	0	0
LOC100507424	I-SPY	TP	3.47	-4.7	7.8	1	0	0
CD274	I-SPY	TP	3.47	-3.96	7.8	1	0	0
CCR1	I-SPY	TP	3.45	-5.65	7.8	1	0	0
UGT8	I-SPY	TP	3.44	-1.61	7.8	1	0	0
CHEK1	I-SPY	TP	3.42	-2.97	7.8	1	0	0
DOK5	I-SPY	TP	3.41	-1.67	7.8	1	0	0
MCM6	I-SPY	TP	3.4	-8.58	7.8	1	0	0
GART	I-SPY	TP	3.39	-6.52	7.8	1	0	0
SNORD89	I-SPY	TP	3.39	-2.1	7.8	1	0	0
OAS2	I-SPY	TP	3.38	15.99	7.8	1	0	0
STARD7	I-SPY	TP	3.38	-25.08	7.8	1	0	0
RNF168	I-SPY	TP	3.37	-7.97	7.8	1	0	0
PRKY	I-SPY	TP	3.35	-1.44	7.8	1	0	0
CDCA2	I-SPY	TP	3.34	-4.66	7.8	1	0	0
GNB4	I-SPY	TP	3.34	-1336.04	7.8	1	0	0
GCNT2	I-SPY	TP	3.33	-2.21	7.8	1	0	0
WARS	I-SPY	TP	3.33	286.24	7.8	1	0	0
CTSL1	I-SPY	TP	3.32	-3.46	7.8	1	0	0
SSR1	I-SPY	TP	3.3	-1.63	7.8	1	0	0
TMEM173	I-SPY	TP	3.29	-2	7.8	1	0	0
PET117	I-SPY	TP	3.28	-3.88	9.93	1	0	0
CAMK2G	I-SPY	TP	3.27	-2.1	9.93	1	0	0
VDAC1	I-SPY	TP	3.26	-16.14	9.93	1	0	0
TMED8	I-SPY	TP	3.25	-1.85	9.93	1	0	0
CEP55	I-SPY	TP	3.25	155.15	9.93	1	0	0
CDCA5	I-SPY	TP	3.25	-5.31	9.93	1	0	0
GRP	I-SPY	TP	3.23	-4.39	9.93	1	0	0
CSRP2	I-SPY	TP	3.22	-1.55	9.93	1	0	0
RRAGD	I-SPY	TP	3.21	-2	9.93	1	0	0
SIRT5	I-SPY	TP	3.2	-1.74	9.93	1	0	0
DHX36	I-SPY	TP	3.19	-2.88	9.93	1	0	0
LOC100128501	I-SPY	TP	3.19	-1.95	9.93	1	0	0
RFC4	I-SPY	TP	3.19	-3.44	9.93	1	0	0
NKPD1	I-SPY	TP	3.17	-2.16	9.93	1	0	0
EIF2AK2	I-SPY	TP	3.17	-9.95	9.93	1	0	0
PPP2R3A	I-SPY	TP	3.17	-1.32	9.93	1	0	0
C12orf4	I-SPY	TP	3.16	-4.25	9.93	1	0	0
TBC1D7	I-SPY	TP	3.16	-2.53	9.93	1	0	0
C11orf41	I-SPY	TP	3.16	-1.94	9.93	1	0	0
JPH2	I-SPY	TP	3.16	-1.98	9.93	1	0	0
RHEB	I-SPY	TP	3.15	-2.14	9.93	1	0	0
CDKN2C	I-SPY	TP	3.14	-11.19	9.93	1	0	0
TEX10	I-SPY	TP	3.14	-1.39	9.93	1	0	0
TRPV3	I-SPY	TP	3.14	-2.85	9.93	1	0	0
CDC6	I-SPY	TP	3.14	-6.51	9.93	1	0	0
WDR60	I-SPY	TP	-5.39	-2.44	0	1	1	1
FRZB	I-SPY	TP	-5	-1.75	0	1	1	1
DPP6	I-SPY	TP	-4.58	-2.25	0	1	1	1
OLIG2	I-SPY	TP	-4.46	-2.13	0	1	1	1
C7orf26	I-SPY	TP	-4.43	-2.46	0	1	1	1
CCNL2	I-SPY	TP	-4.34	-4.22	0	1	1	1
HSPA12A	I-SPY	TP	-4.31	-2.73	0	1	1	1
MAPK15	I-SPY	TP	-4.29	-2.16	0	1	1	1
ARHGEF1	I-SPY	TP	-4.23	-2.08	0	1	1	1
PQLC3	I-SPY	TP	-4.06	-1.08	0	1	1	1
KLHDC2	I-SPY	TP	-4.04	-3.88	0	1	1	1
C16orf45	I-SPY	TP	-4.01	-3.69	0	1	1	1
NUDT16L1	I-SPY	TP	-4.01	-2.98	0	1	1	1
AGR3	I-SPY	TP	-3.93	-1.88	0	1	1	1
LZTFL1	I-SPY	TP	-3.89	-4.41	3.78	1	1	0
MKL2	I-SPY	TP	-3.89	-2.39	3.78	1	1	0
ACVR2A	I-SPY	TP	-3.89	-2.16	3.78	1	1	0
COL16A1	I-SPY	TP	-3.87	-3.21	3.78	1	1	0
ZNF263	I-SPY	TP	-3.84	-3.45	3.78	1	1	0
WWP1	I-SPY	TP	-3.84	-2.86	3.78	1	1	0
SCUBE2	I-SPY	TP	-3.83	-2.01	3.78	1	1	0
STC2	I-SPY	TP	-3.82	-2.33	3.78	1	1	0
C1orf115	I-SPY	TP	-3.73	-2.59	3.78	1	1	0
STUB1	I-SPY	TP	-3.69	-1.78	3.78	1	1	0
TTC8	I-SPY	TP	-3.65	-3.67	5.67	1	0	0
DBNDD2	I-SPY	TP	-3.64	-1.52	5.67	1	0	0
VPS26B	I-SPY	TP	-3.62	-0.75	5.67	1	0	0
ABCA3	I-SPY	TP	-3.61	-1.12	5.67	1	0	0
IGF1R	I-SPY	TP	-3.6	-1.03	5.67	1	0	0
MAGED4B	I-SPY	TP	-3.59	-2.67	5.67	1	0	0
ANKMY2	I-SPY	TP	-3.59	-332.57	5.67	1	0	0
KCNJ8	I-SPY	TP	-3.58	-0.93	5.67	1	0	0
RHOT2	I-SPY	TP	-3.57	-1.41	5.67	1	0	0
RAC3	I-SPY	TP	-3.57	-0.97	5.67	1	0	0
MLPH	I-SPY	TP	-3.56	-2.79	5.67	1	0	0
NRK	I-SPY	TP	-3.56	-4.14	5.67	1	0	0
ITGB5	I-SPY	TP	-3.52	-1.23	5.67	1	0	0
DNALI1	I-SPY	TP	-3.52	-1.26	5.67	1	0	0
GFRA1	I-SPY	TP	-3.51	-2.01	5.67	1	0	0
HYI	I-SPY	TP	-3.5	-1.57	5.67	1	0	0
ZNF703	I-SPY	TP	-3.5	-2.1	5.67	1	0	0
COG2	I-SPY	TP	-3.5	-1.39	5.67	1	0	0
ANXA7	I-SPY	TP	-3.49	-1.89	5.67	1	0	0
DDX55	I-SPY	TP	-3.49	-6.21	5.67	1	0	0
RAB17	I-SPY	TP	-3.48	-2.74	5.67	1	0	0
SH3PXD2A	I-SPY	TP	-3.43	-1.99	5.67	1	0	0
ESR1	I-SPY	TP	-3.43	-4.13	5.67	1	0	0
ZNF12	I-SPY	TP	-3.42	-2.39	7.18	1	0	0
C4A	I-SPY	TP	-3.41	-1.46	7.18	1	0	0
IL6ST	I-SPY	TP	-3.41	-1.44	7.18	1	0	0
C14orf135	I-SPY	TP	-3.41	-2.07	7.18	1	0	0
FBXL7	I-SPY	TP	-3.39	-2.94	7.18	1	0	0
PVRL1	I-SPY	TP	-3.39	-14.15	7.18	1	0	0
LHX	I-SPY	TP	-3.39	-1.24	7.18	1	0	0
CCDC149	I-SPY	TP	-3.39	-2.62	7.18	1	0	0
C19orf47	I-SPY	TP	-3.38	-1.21	7.18	1	0	0
PGR	I-SPY	TP	-3.37	-1.77	7.18	1	0	0
CRCT1	I-SPY	TP	-3.36	-1.7	7.18	1	0	0
TBC1D9	I-SPY	TP	-3.35	-2.09	7.18	1	0	0
THSD4	I-SPY	TP	-3.32	-1.93	7.18	1	0	0
TMC4	I-SPY	TP	-3.32	-2.26	7.18	1	0	0
DNMBP	I-SPY	TP	-3.32	-3.41	7.18	1	0	0
MREG	I-SPY	TP	-3.27	-2.17	7.18	1	0	0
KCTD18	I-SPY	TP	-3.27	-3.22	7.18	1	0	0
KIF9	I-SPY	TP	-3.27	-7.28	7.18	1	0	0
COPS8	I-SPY	TP	-3.25	-0.91	7.18	1	0	0
CEP290	I-SPY	TP	-3.25	-3.95	7.18	1	0	0
NAT2	I-SPY	TP	-3.25	-2.32	7.18	1	0	0
NUBP2	I-SPY	TP	-3.24	-3.81	7.18	1	0	0
LAMB2	I-SPY	TP	-3.23	-2.09	7.18	1	0	0
C19orf22	I-SPY	TP	-3.23	-1.43	7.18	1	0	0
MAGED2	I-SPY	TP	-3.22	-1.74	7.18	1	0	0
ANKRD43	I-SPY	TP	-3.2	-4.49	7.8	1	0	0
ERBB4	I-SPY	TP	-3.2	-2.21	7.8	1	0	0
FOXA1	I-SPY	TP	-3.2	-2.39	7.8	1	0	0
SUSD3	I-SPY	TP	-3.19	-1.15	7.8	1	0	0
PREX1	I-SPY	TP	-3.19	-0.82	7.8	1	0	0
ERBB3	I-SPY	TP	-3.19	-2.3	7.8	1	0	0
ORAOV1	I-SPY	TP	-3.19	-1.41	7.8	1	0	0
GTP	I-SPY	TP	-3.18	-2.01	7.8	1	0	0
MTL5	I-SPY	TP	-3.18	-0.94	7.8	1	0	0
HSD17B2	I-SPY	TP	-3.17	-4.07	7.8	1	0	0
C2orf69	I-SPY	TP	-3.17	-1	7.8	1	0	0
TFF3	I-SPY	TP	-3.16	-1.42	7.8	1	0	0
VPS13B	I-SPY	TP	-3.16	-1.91	7.8	1	0	0
BTF3	I-SPY	TP	-3.15	-1.8	7.8	1	0	0
NT5M	I-SPY	TP	-3.15	-2.16	7.8	1	0	0
FAAH	I-SPY	TP	-3.14	-1.55	7.8	1	0	0
LRRC17	I-SPY	TP	-3.14	-2.57	7.8	1	0	0
NRIP1	I-SPY	TP	-3.13	-1.13	7.8	1	0	0
PEX6	I-SPY	TP	-3.12	-2.79	7.8	1	0	0
C14orf45	I-SPY	TP	-3.12	-1.7	7.8	1	0	0
C12orf42	I-SPY	TP	-3.11	-2.81	7.8	1	0	0
TMEM9	I-SPY	TP	-3.11	-4.18	7.8	1	0	0
TTC39A	I-SPY	TP	-3.1	-0.78	7.8	1	0	0
ERGIC3	I-SPY	TP	-3.1	-1.33	7.8	1	0	0
FAM173B	I-SPY	TP	-3.09	-2.62	7.8	1	0	0
KIAA1244	I-SPY	TP	-3.09	-1.92	7.8	1	0	0
DEXI	I-SPY	TP	-3.09	12.26	7.8	1	0	0
CNTN4	I-SPY	TP	-3.08	-4.09	7.8	1	0	0
CREB3L4	I-SPY	TP	-3.07	-1.07	9.93	1	0	0
TREH	I-SPY	TP	-3.07	-1.92	9.93	1	0	0
MEIS3P1	I-SPY	TP	-3.06	-8.29	9.93	1	0	0
MYOF	I-SPY	TP	-3.04	-1.48	9.93	1	0	0
ANXA6	I-SPY	TP	-3.04	-0.79	9.93	1	0	0
CPNE3	I-SPY	TP	-3.04	-1.43	9.93	1	0	0
CECR6	I-SPY	TP	-3.03	-2.8	9.93	1	0	0
NNAT	NEO	TM	6.2	6.39	0	1	1	1
TNXA	NEO	TM	5.95	7.85	0	1	1	1
AQP7	NEO	TM	5.51	3.8	0	1	1	1
SCN1B	NEO	TM	5.48	1.33	0	1	1	1
HEPACAM	NEO	TM	5.3	5.8	0	1	1	1
CFD	NEO	TM	5.25	1.58	0	1	1	1
KLB	NEO	TM	5.18	6.38	0	1	1	1
MYZAP	NEO	TM	5.17	2.1	0	1	1	1
EBF3	NEO	TM	5.04	2.37	0	1	1	1
GYPC	NEO	TM	4.98	1.28	0	1	1	1
PDE2A	NEO	TM	4.93	1.64	0	1	1	1
ACO1	NEO	TM	4.93	1.27	0	1	1	1
PLIN4	NEO	TM	4.9	2.86	0	1	1	1
MARCO	NEO	TM	4.88	10.44	0	1	1	1
KCNIP2	NEO	TM	4.87	3.38	0	1	1	1
CNTFR	NEO	TM	4.81	4.39	0	1	1	1
GLYAT	NEO	TM	4.8	3.67	0	1	1	1
TMEM132C	NEO	TM	4.78	3.15	0	1	1	1
CHRDL1	NEO	TM	4.77	1.58	0	1	1	1
HRASLS5	NEO	TM	4.77	3.19	0	1	1	1
CA4	NEO	TM	4.76	4.39	0	1	1	1
TNXB	NEO	TM	4.71	2.48	0	1	1	1
NPR1	NEO	TM	4.7	2.07	0	1	1	1
SGCG	NEO	TM	4.68	5.77	0	1	1	1
HSPB7	NEO	TM	4.68	2.51	0	1	1	1
LIPE	NEO	TM	4.66	1.99	0	1	1	1
GPIHBP1	NEO	TM	4.61	2.56	0	1	1	1
MSRA	NEO	TM	4.61	1.29	0	1	1	1
FBLN2	NEO	TM	4.59	1.46	0	1	1	1
TUSC5	NEO	TM	4.56	3.18	0	1	1	1
TYRO3	NEO	TM	4.51	1.53	0	1	1	1
SLC2A4	NEO	TM	4.5	4.3	0	1	1	1
C1QTNF9	NEO	TM	4.49	3.91	0	1	1	1
SCARA5	NEO	TM	4.46	2.76	0	1	1	1
RBP4	NEO	TM	4.42	1.65	0	1	1	1
F10	NEO	TM	4.4	2.2	0	1	1	1
AOC3	NEO	TM	4.39	1.56	0	1	1	1
SCD	NEO	TM	4.38	1.45	0	1	1	1
RDH5	NEO	TM	4.37	1.83	0	1	1	1
CRHBP	NEO	TM	4.37	2.84	0	1	1	1
ACVRL1	NEO	TM	4.35	1.24	0	1	1	1
MME	NEO	TM	4.34	2.9	0	1	1	1
ALDOC	NEO	TM	4.32	1.52	0	1	1	1
TFPI	NEO	TM	4.32	1.26	0	1	1	1
BTNL9	NEO	TM	4.32	1.92	0	1	1	1
PPARG	NEO	TM	4.28	1.41	0	1	1	1
MLXIPL	NEO	TM	4.27	3.59	0	1	1	1
HSPB6	NEO	TM	4.24	2.32	0	1	1	1
CLEC3B	NEO	TM	4.21	1.47	0	1	1	1
GPAM	NEO	TM	4.19	1.48	0	1	1	1
PFKFB1	NEO	TM	4.19	3.03	0	1	1	1
LILRB5	NEO	TM	4.19	1.64	0	1	1	1
HYAL1	NEO	TM	4.18	2.89	0	1	1	1
ATP1A2	NEO	TM	4.16	3.16	0	1	1	1
VEGFB	NEO	TM	4.16	1.24	0	1	1	1
LEP	NEO	TM	4.15	2.3	0	1	1	1
MGLL	NEO	TM	4.14	1.43	0	1	1	1
PID1	NEO	TM	4.12	2.11	0	1	1	1
PLIN1	NEO	TM	4.12	1.96	0	1	1	1
GPD1	NEO	TM	4.07	1.93	0	1	1	1
S1PR1	NEO	TM	4.05	1.43	0	1	1	1
SCN4B	NEO	TM	4.05	2.02	0	1	1	1
ACACB	NEO	TM	4.04	1.53	0	1	1	1
TNMD	NEO	TM	4.04	3.47	0	1	1	1
SGK2	NEO	TM	4.03	2.5	0	1	1	1
GPX3	NEO	TM	4.03	1.39	0	1	1	1
RGL1	NEO	TM	4.02	1.21	0	1	1	1
ARHGAP20	NEO	TM	4	1.63	0	1	1	1
RHOU	NEO	TM	4	1.25	0	1	1	1
BHMT2	NEO	TM	3.99	1.61	0	1	1	1
EDNRB	NEO	TM	3.99	1.33	0	1	1	1
SNTB2	NEO	TM	3.96	1.13	0	1	1	1
DHRS3	NEO	TM	3.96	1.17	0	1	1	1
ACVR1C	NEO	TM	3.95	2.16	0	1	1	1
AQPEP	NEO	TM	3.94	2.83	0	1	1	1
GYG2	NEO	TM	3.93	1.72	0	1	1	1
ROBO4	NEO	TM	3.93	2.15	0	1	1	1
PCOLCE2	NEO	TM	3.92	2.03	0	1	1	1
DGAT2	NEO	TM	3.92	1.59	0	1	1	1
CYGB	NEO	TM	3.91	1.37	0	1	1	1
KLHL31	NEO	TM	3.91	5.58	0	1	1	1
TMEM220	NEO	TM	3.89	1.36	0	1	1	1
SHE	NEO	TM	3.89	1.86	0	1	1	1
LPL	NEO	TM	3.88	1.41	0	1	1	1
LHFP	NEO	TM	3.87	1.32	0	1	1	1
ABLIM3	NEO	TM	3.86	2.27	0	1	1	1
GNAI1	NEO	TM	3.86	1.22	0	1	1	1
LINC00341	NEO	TM	3.85	1.36	0	1	1	1
CRYL1	NEO	TM	3.84	1.17	0	1	1	1
AKAP12	NEO	TM	3.84	1.26	0	1	1	1
AKR1C3	NEO	TM	3.81	1.46	0	1	1	1
ABHD6	NEO	TM	3.81	1.35	0	1	1	1
TMEM100	NEO	TM	3.8	2.11	0	1	1	1
GRASP	NEO	TM	3.79	1.4	0	1	1	1
CES1	NEO	TM	3.78	1.43	0	1	1	1
SLC18B1	NEO	TM	3.77	1.23	0	1	1	1
APOB	NEO	TM	3.77	6.54	0	1	1	1
LGALS12	NEO	TM	3.77	5.52	0	1	1	1
TIMP4	NEO	TM	3.76	2.15	0	1	1	1
CD36	NEO	TM	3.75	1.38	0	1	1	1
CD209	NEO	TM	3.75	1.68	0	1	1	1
LYVE1	NEO	TM	3.75	1.55	0	1	1	1
STAB2	NEO	TM	3.74	3.6	0	1	1	1
DTP	NEO	TM	3.74	1.29	0	1	1	1
CYP20A1	NEO	TM	3.73	1.1	0	1	1	1
SLC29A4	NEO	TM	3.73	2.35	0	1	1	1
C10orf128	NEO	TM	3.72	1.24	0	1	1	1
PCSK5	NEO	TM	3.71	1.33	0	1	1	1
METTL7A	NEO	TM	3.7	1.23	0	1	1	1
STPBN1	NEO	TM	3.7	1.17	0	1	1	1
CXorf36	NEO	TM	3.68	1.76	0	1	1	1
DENND2A	NEO	TM	3.67	1.71	0	1	1	1
TGFBR3	NEO	TM	3.67	1.35	0	1	1	1
MASP1	NEO	TM	3.67	3.41	0	1	1	1
EPB41L3	NEO	TM	3.65	1.16	0	1	1	1
CD34	NEO	TM	3.65	1.35	0	1	1	1
FIGF	NEO	TM	3.64	2.69	0	1	1	1
CTNND1	NEO	TM	3.64	1.17	0	1	1	1
IGFBP6	NEO	TM	3.63	1.31	0	1	1	1
IL11RA	NEO	TM	3.63	1.38	0	1	1	1
AK3	NEO	TM	3.62	1.13	0	1	1	1
VEGFC	NEO	TM	3.62	1.24	0	1	1	1
ADCY5	NEO	TM	3.62	2.91	0	1	1	1
PALM	NEO	TM	3.62	1.68	0	1	1	1
PLAC9	NEO	TM	3.61	1.63	0	1	1	1
ITGA7	NEO	TM	3.6	1.76	0	1	1	1
FAM149A	NEO	TM	3.6	1.43	0	1	1	1
GPR146	NEO	TM	3.59	1.44	0	1	1	1
ANXA6	NEO	TM	3.59	1.07	0	1	1	1
HLX	NEO	TM	3.59	1.38	0	1	1	1
EPDR1	NEO	TM	3.59	1.24	0	1	1	1
DUSP1	NEO	TM	3.59	1.25	0	1	1	1
DAB2	NEO	TM	3.58	1.15	0	1	1	1
GNG2	NEO	TM	3.57	1.23	0	1	1	1
NR3C1	NEO	TM	3.57	1.17	0	1	1	1
PLTP	NEO	TM	3.56	1.24	0	1	1	1
HSPA7	NEO	TM	3.55	1.25	0	1	1	1
BNIP3L	NEO	TM	3.55	1.12	0	1	1	1
AGPAT2	NEO	TM	3.54	1.49	0	1	1	1
DPP4	NEO	TM	3.54	1.24	0	1	1	1
MAF	NEO	TM	3.53	1.3	0	1	1	1
INSIG1	NEO	TM	3.53	1.25	0	1	1	1
PRKCE	NEO	TM	3.51	1.32	0.63	1	1	0
ABHD14B	NEO	TM	3.5	1.13	0.63	1	1	0
CAV2	NEO	TM	3.5	1.24	0.63	1	1	0
BMX	NEO	TM	3.5	2.21	0.63	1	1	0
SEC14L1	NEO	TM	3.49	1.17	0.63	1	1	0
CHST7	NEO	TM	3.49	1.44	0.63	1	1	0
CALB2	NEO	TM	3.48	1.81	0.63	1	1	0
C19orf80	NEO	TM	3.47	5.98	0.63	1	1	0
ZNF385A	NEO	TM	3.46	1.39	0.63	1	1	0
RGN	NEO	TM	3.46	2.23	0.63	1	1	0
CR1	NEO	TM	3.45	4.03	0.63	1	1	0
ITIH5	NEO	TM	3.45	1.41	0.63	1	1	0
INMT	NEO	TM	3.45	1.49	0.63	1	1	0
PROX1	NEO	TM	3.43	1.99	0.63	1	1	0
C7	NEO	TM	3.42	1.47	0.63	1	1	0
SLC19A3	NEO	TM	3.42	2.02	0.63	1	1	0
ZEB2	NEO	TM	3.42	1.14	0.63	1	1	0
LGI4	NEO	TM	3.42	2.34	0.63	1	1	0
DEFB132	NEO	TM	3.42	3.42	0.63	1	1	0
PEMT	NEO	TM	3.41	2.21	0.63	1	1	0
CDH5	NEO	TM	3.41	1.35	0.63	1	1	0
KLHDC8B	NEO	TM	3.4	1.28	0.63	1	1	0
MAOA	NEO	TM	3.4	1.41	0.63	1	1	0
PLEKHG5	NEO	TM	3.4	1.46	0.63	1	1	0
ABCA6	NEO	TM	3.4	1.23	0.63	1	1	0
EGFL7	NEO	TM	3.39	1.42	0.63	1	1	0
ABCA9	NEO	TM	3.38	1.3	0.63	1	1	0
INPP1	NEO	TM	3.38	1.16	0.63	1	1	0
DOC2B	NEO	TM	3.38	1.87	0.86	1	1	0
DCLK1	NEO	TM	3.38	1.33	0.86	1	1	0
GJA4	NEO	TM	3.37	1.36	0.86	1	1	0
CFL2	NEO	TM	3.37	1.22	0.86	1	1	0
SORBS3	NEO	TM	3.36	1.36	0.86	1	1	0
CDKN2C	NEO	TM	3.35	1.27	0.86	1	1	0
MMD	NEO	TM	3.35	1.26	0.86	1	1	0
PLIN2	NEO	TM	3.35	1.2	0.86	1	1	0
SVEP1	NEO	TM	3.35	1.3	0.86	1	1	0
ADM	NEO	TM	3.35	1.39	0.86	1	1	0
F8	NEO	TM	3.34	1.61	0.86	1	1	0
ANKRD29	NEO	TM	3.33	1.54	0.86	1	1	0
ABLIM1	NEO	TM	3.33	1.35	0.86	1	1	0
GPR116	NEO	TM	3.32	1.28	0.86	1	1	0
HSPA12A	NEO	TM	3.32	1.57	0.86	1	1	0
RELN	NEO	TM	3.31	3.08	0.86	1	1	0
CCDC69	NEO	TM	3.3	1.31	0.86	1	1	0
SYN2	NEO	TM	3.3	3.29	0.86	1	1	0
OTUD5	NEO	TM	3.3	1.11	0.86	1	1	0
THRSP	NEO	TM	3.3	1.8	0.86	1	1	0
FOS	NEO	TM	3.29	1.57	0.86	1	1	0
ESAM	NEO	TM	3.29	1.42	0.86	1	1	0
FOSB	NEO	TM	3.29	5.67	0.86	1	1	0
SNORA70F	NEO	TM	3.28	1.29	0.86	1	1	0
BCL6B	NEO	TM	3.28	1.6	0.86	1	1	0
ARHGAP42	NEO	TM	3.28	1.2	0.86	1	1	0
DDR2	NEO	TM	3.28	1.18	0.86	1	1	0
ANO6	NEO	TM	3.28	1.12	0.86	1	1	0
FLT1	NEO	TM	3.27	1.39	0.86	1	1	0
GPNMB	NEO	TM	3.27	1.13	0.86	1	1	0
SLC22A3	NEO	TM	3.27	2.03	0.86	1	1	0
PALMD	NEO	TM	3.26	1.3	0.86	1	1	0
NAALAD2	NEO	TM	3.26	2.07	0.86	1	1	0
PPP1R1A	NEO	TM	3.26	1.99	0.86	1	1	0
SRPX	NEO	TM	3.25	1.35	0.86	1	1	0
STARD8	NEO	TM	3.25	1.49	0.86	1	1	0
TMEM170B	NEO	TM	3.23	1.41	1.18	1	1	0
ZFPM2	NEO	TM	3.22	1.4	1.18	1	1	0
PRRT4	NEO	TM	3.22	5.57	1.18	1	1	0
GSN	NEO	TM	3.22	1.12	1.18	1	1	0
FZD4	NEO	TM	3.22	1.33	1.18	1	1	0
CHCHD10	NEO	TM	3.21	1.18	1.18	1	1	0
ACAP2	NEO	TM	3.21	1.08	1.18	1	1	0
EFNB1	NEO	TM	3.21	1.22	1.18	1	1	0
CDO1	NEO	TM	3.2	1.25	1.18	1	1	0
PI16	NEO	TM	3.19	1.89	1.18	1	1	0
CXCL12	NEO	TM	3.19	1.17	1.18	1	1	0
GTF2A1	NEO	TM	3.18	1.06	1.18	1	1	0
SLC25A45	NEO	TM	3.18	1.28	1.18	1	1	0
SYNE3	NEO	TM	3.18	1.31	1.18	1	1	0
CALM3	NEO	TM	3.18	1.07	1.18	1	1	0
TRHDE-AS1	NEO	TM	3.17	4.28	1.18	1	1	0
ALDH2	NEO	TM	3.17	1.18	1.18	1	1	0
PREX2	NEO	TM	3.17	1.53	1.18	1	1	0
PARVB	NEO	TM	3.17	1.19	1.18	1	1	0
CRTAP	NEO	TM	3.17	1.13	1.18	1	1	0
PNPLA2	NEO	TM	3.17	1.29	1.18	1	1	0
PCK1	NEO	TM	3.16	2.96	1.18	1	1	0
ICAM2	NEO	TM	3.16	1.23	1.18	1	1	0
CD22	NEO	TM	3.15	2.05	1.18	1	1	0
ZCCHC16	NEO	TM	3.15	1.55	1.18	1	1	0
KLF2	NEO	TM	3.15	1.41	1.18	1	1	0
GNG11	NEO	TM	3.15	1.2	1.18	1	1	0
INVS	NEO	TM	3.15	1.13	1.18	1	1	0
GNAL	NEO	TM	3.15	1.6	1.18	1	1	0
EMILIN2	NEO	TM	3.14	1.29	1.18	1	1	0
WASF3	NEO	TM	3.14	1.42	1.18	1	1	0
NMB	NEO	TM	3.14	1.62	1.18	1	1	0
RAPGEF3	NEO	TM	3.14	1.75	1.18	1	1	0
RBP7	NEO	TM	3.13	1.34	1.18	1	1	0
TPPRM	NEO	TM	3.13	1.17	1.18	1	1	0
43526	NEO	TM	3.13	1.12	1.18	1	1	0
CD248	NEO	TM	3.12	1.27	1.18	1	1	0
ANGTP2	NEO	TM	3.12	1.29	1.18	1	1	0
B4GALT6	NEO	TM	3.12	2	1.18	1	1	0
FAM49A	NEO	TM	3.12	1.18	1.18	1	1	0
PGM5	NEO	TM	3.12	1.61	1.18	1	1	0
CCDC102B	NEO	TM	3.11	1.32	1.18	1	1	0
TIE1	NEO	TM	3.11	1.6	1.18	1	1	0
AVPR1A	NEO	TM	3.11	1.52	1.18	1	1	0
ABCD2	NEO	TM	3.11	1.83	1.18	1	1	0
MAFB	NEO	TM	3.11	1.16	1.18	1	1	0
PDE3B	NEO	TM	3.1	1.49	1.18	1	1	0
GSTM5	NEO	TM	3.1	1.76	1.18	1	1	0
MFAP4	NEO	TM	3.1	1.25	1.18	1	1	0
PRELP	NEO	TM	3.1	1.29	1.18	1	1	0
MYO1C	NEO	TM	3.1	1.71	1.18	1	1	0
ADRB2	NEO	TM	3.09	1.35	1.18	1	1	0
PPAP2B	NEO	TM	3.09	1.18	1.18	1	1	0
ERG	NEO	TM	3.08	1.42	1.62	1	1	0
RAI2	NEO	TM	3.08	2.27	1.62	1	1	0
LRRC25	NEO	TM	3.08	1.48	1.62	1	1	0
HPS1	NEO	TM	3.07	1.24	1.62	1	1	0
FAM162B	NEO	TM	3.06	1.67	1.62	1	1	0
CLEC14A	NEO	TM	3.06	1.31	1.62	1	1	0
EBF1	NEO	TM	3.06	1.38	1.62	1	1	0
VPS11	NEO	TM	3.06	1.09	1.62	1	1	0
ARHGAP24	NEO	TM	3.06	1.27	1.62	1	1	0
MYO5A	NEO	TM	3.06	1.1	1.62	1	1	0
LDB2	NEO	TM	3.05	1.24	1.62	1	1	0
PPP3R1	NEO	TM	3.04	1.07	1.62	1	1	0
CDKN1C	NEO	TM	3.04	1.33	1.62	1	1	0
SNX29P2	NEO	TM	3.04	1.44	1.62	1	1	0
NRN1	NEO	TM	3.03	1.31	1.62	1	1	0
TRAK1	NEO	TM	3.03	1.16	1.62	1	1	0
NOVA2	NEO	TM	3.03	2.46	1.62	1	1	0
IGFBP3	NEO	TM	3.02	1.17	1.62	1	1	0
RNF157	NEO	TM	3.02	2.53	1.62	1	1	0
AQP1	NEO	TM	3.02	1.24	1.62	1	1	0
FCHO2	NEO	TM	3.02	1.13	1.62	1	1	0
EBF2	NEO	TM	3.02	1.89	1.62	1	1	0
CPNE2	NEO	TM	3.02	1.21	1.62	1	1	0
ABCA8	NEO	TM	3.02	1.5	1.62	1	1	0
HADHA	NEO	TM	3.01	1.08	1.62	1	1	0
KLF4	NEO	TM	3	1.23	1.62	1	1	0
CLMP	NEO	TM	3	1.16	1.62	1	1	0
SLC12A6	NEO	TM	3	1.16	1.62	1	1	0
STON2	NEO	TM	3	1.36	1.62	1	1	0
PFKFB3	NEO	TM	3	1.28	1.62	1	1	0
CAT	NEO	TM	2.99	1.11	1.62	1	1	0
NTS	NEO	TM	2.99	25.81	1.62	1	1	0
ACAD11	NEO	TM	2.99	1.2	1.62	1	1	0
KCNAB1	NEO	TM	2.99	1.58	1.62	1	1	0
FOXN3	NEO	TM	2.98	1.38	1.62	1	1	0
ELMOD3	NEO	TM	2.98	1.23	1.62	1	1	0
TRAK2	NEO	TM	2.98	1.13	1.62	1	1	0
NDN	NEO	TM	2.98	1.19	1.62	1	1	0
PLEKHM2	NEO	TM	2.98	1.15	1.62	1	1	0
ITPK1	NEO	TM	2.98	1.18	1.62	1	1	0
PDE8A	NEO	TM	2.97	1.12	1.62	1	1	0
OSBPL11	NEO	TM	2.97	1.11	1.62	1	1	0
FAM46A	NEO	TM	2.95	1.19	1.62	1	1	0
ELK3	NEO	TM	2.95	1.11	1.62	1	1	0
PDE7B	NEO	TM	2.95	1.76	1.62	1	1	0
MATN2	NEO	TM	2.95	1.27	1.62	1	1	0
EPAS1	NEO	TM	2.95	1.28	1.62	1	1	0
FBLN5	NEO	TM	2.95	1.17	2.07	1	1	0
ENPP2	NEO	TM	2.95	1.2	2.07	1	1	0
MYCBP2	NEO	TM	2.95	1.12	2.07	1	1	0
CROCCP3	NEO	TM	2.94	1.31	2.07	1	1	0
SH3KBP1	NEO	TM	2.94	1.23	2.07	1	1	0
FADS3	NEO	TM	2.94	1.34	2.07	1	1	0
VAT1	NEO	TM	2.94	1.14	2.07	1	1	0
HAAO	NEO	TM	2.94	1.34	2.07	1	1	0
TNFSF12	NEO	TM	2.94	1.17	2.07	1	1	0
ALDH1A1	NEO	TM	2.94	1.18	2.07	1	1	0
SLC38A6	NEO	TM	2.93	1.09	2.07	1	1	0
TMCC3	NEO	TM	2.93	1.22	2.07	1	1	0
STX11	NEO	TM	2.92	1.48	2.07	1	1	0
MBNL3	NEO	TM	2.92	1.3	2.07	1	1	0
AKR1C1	NEO	TM	2.92	1.62	2.07	1	1	0
SMG1P1	NEO	TM	2.92	1.1	2.07	1	1	0
RAMP2	NEO	TM	2.91	1.17	2.07	1	1	0
NIPSNAP3B	NEO	TM	2.91	1.43	2.07	1	1	0
DCP1A	NEO	TM	2.9	1.13	2.07	1	1	0
PLXNA4	NEO	TM	2.9	1.69	2.07	1	1	0
FABP4	NEO	TM	2.9	1.38	2.07	1	1	0
CYP2U1	NEO	TM	2.9	1.18	2.07	1	1	0
NAT8L	NEO	TM	2.9	2.63	2.07	1	1	0
MEOX1	NEO	TM	2.9	1.84	2.07	1	1	0
ELMO1	NEO	TM	2.9	1.22	2.07	1	1	0
MAN1A1	NEO	TM	2.9	1.11	2.07	1	1	0
MYCT1	NEO	TM	2.9	1.36	2.07	1	1	0
KCTD12	NEO	TM	2.89	1.19	2.07	1	1	0
SERINC1	NEO	TM	2.89	1.08	2.07	1	1	0
TMEM133	NEO	TM	2.88	1.27	2.07	1	1	0
CCDC92	NEO	TM	2.88	1.11	2.07	1	1	0
KIAA0408	NEO	TM	2.88	1.88	2.07	1	1	0
GRK5	NEO	TM	2.88	1.21	2.07	1	1	0
FNIP2	NEO	TM	2.87	1.15	2.07	1	1	0
PIK3R1	NEO	TM	2.87	1.13	2.07	1	1	0
C6orf120	NEO	TM	2.87	1.14	2.07	1	1	0
FOXO4	NEO	TM	2.87	1.27	2.07	1	1	0
PKDCC	NEO	TM	2.87	1.36	2.07	1	1	0
ASB1	NEO	TM	2.86	1.13	2.07	1	1	0
COL4A3BP	NEO	TM	2.86	1.08	2.07	1	1	0
ZFP106	NEO	TM	2.86	1.12	2.07	1	1	0
KCNJ5	NEO	TM	2.86	1.46	2.07	1	1	0
SEMA3G	NEO	TM	2.86	1.87	2.07	1	1	0
UST	NEO	TM	2.85	1.19	2.07	1	1	0
DLL4	NEO	TM	2.85	1.84	2.07	1	1	0
MYOM1	NEO	TM	2.85	1.72	2.07	1	1	0
GBE1	NEO	TM	2.85	1.18	2.07	1	1	0
LYL1	NEO	TM	2.85	1.5	2.07	1	1	0
IFFO1	NEO	TM	2.85	1.3	2.07	1	1	0
ADAM33	NEO	TM	2.85	1.75	2.07	1	1	0
FLT4	NEO	TM	2.85	1.62	2.07	1	1	0
PRND	NEO	TM	2.84	2.38	2.07	1	1	0
TPPRS	NEO	TM	2.84	1.26	2.07	1	1	0
AP1S2	NEO	TM	2.84	1.14	2.07	1	1	0
ANGTPL2	NEO	TM	2.84	1.29	2.07	1	1	0
EZH1	NEO	TM	2.84	1.16	2.07	1	1	0
LGMN	NEO	TM	2.84	1.13	2.07	1	1	0
FBXW7	NEO	TM	2.83	1.12	2.07	1	1	0
PIKFYVE	NEO	TM	2.83	1.09	2.07	1	1	0
PCYOX1	NEO	TM	2.83	1.1	2.07	1	1	0
PKN2	NEO	TM	2.83	1.05	2.07	1	1	0
PXN	NEO	TM	2.83	1.26	2.07	1	1	0
CD99L2	NEO	TM	2.82	1.09	2.07	1	1	0
DAAM2	NEO	TM	2.82	1.38	2.07	1	1	0
GPS2	NEO	TM	2.81	1.14	2.62	1	1	0
ACOX2	NEO	TM	2.81	1.55	2.62	1	1	0
TF	NEO	TM	2.81	1.62	2.62	1	1	0
NCOA7	NEO	TM	2.81	1.18	2.62	1	1	0
GYS1	NEO	TM	2.81	1.26	2.62	1	1	0
CKMT2	NEO	TM	2.8	1.81	2.62	1	1	0
MMRN2	NEO	TM	2.8	1.32	2.62	1	1	0
TSPAN7	NEO	TM	2.8	1.39	2.62	1	1	0
ABHD15	NEO	TM	2.8	1.23	2.62	1	1	0
TGFBR2	NEO	TM	2.8	1.19	2.62	1	1	0
CIDEA	NEO	TM	2.8	2.52	2.62	1	1	0
SWAP70	NEO	TM	2.8	1.1	2.62	1	1	0
MDFIC	NEO	TM	2.8	1.12	2.62	1	1	0
TLR4	NEO	TM	2.79	1.13	2.62	1	1	0
ACADVL	NEO	TM	2.79	1.14	2.62	1	1	0
ADIPOQ	NEO	TM	2.79	1.51	2.62	1	1	0
CD81	NEO	TM	2.79	1.08	2.62	1	1	0
KCNJ8	NEO	TM	2.79	1.26	2.62	1	1	0
FTL	NEO	TM	2.78	1.09	2.62	1	1	0
CDKN2B	NEO	TM	2.78	1.49	2.62	1	1	0
HSDL2	NEO	TM	2.78	1.13	2.62	1	1	0
DPEP2	NEO	TM	2.78	1.33	2.62	1	1	0
GPER	NEO	TM	2.78	1.74	2.62	1	1	0
STAT5A	NEO	TM	2.77	1.23	2.62	1	1	0
TNS1	NEO	TM	2.77	1.21	2.62	1	1	0
SH3BGRL2	NEO	TM	2.77	1.22	2.62	1	1	0
ADH1B	NEO	TM	2.77	1.38	2.62	1	1	0
FUT4	NEO	TM	2.77	1.19	2.62	1	1	0
CLCN6	NEO	TM	2.77	1.38	2.62	1	1	0
GPR137B	NEO	TM	2.77	1.09	2.62	1	1	0
C9orf78	NEO	TM	2.76	1.06	2.62	1	1	0
KCTD7	NEO	TM	2.76	1.25	2.62	1	1	0
PCDHB15	NEO	TM	2.76	1.56	2.62	1	1	0
ATP2B4	NEO	TM	2.76	1.1	2.62	1	1	0
MIR497HG	NEO	TM	2.76	1.56	2.62	1	1	0
PCBP2	NEO	TM	2.75	1.06	2.62	1	1	0
MCOLN1	NEO	TM	2.75	1.18	2.62	1	1	0
MAP3K5	NEO	TM	2.75	1.17	2.62	1	1	0
CNRIP1	NEO	TM	2.75	1.15	2.62	1	1	0
PVRL3	NEO	TM	2.75	1.25	2.62	1	1	0
RNF125	NEO	TM	2.75	1.24	2.62	1	1	0
SNORA70G	NEO	TM	2.75	1.14	2.62	1	1	0
SEPP1	NEO	TM	2.74	1.1	2.62	1	1	0
LSP1	NEO	TM	2.74	1.11	2.62	1	1	0
RHOJ	NEO	TM	2.74	1.26	2.62	1	1	0
SIK2	NEO	TM	2.74	1.17	2.62	1	1	0
MSC	NEO	TM	2.74	1.35	2.62	1	1	0
GPR124	NEO	TM	2.74	1.25	2.62	1	1	0
TSPYL2	NEO	TM	2.73	1.16	2.62	1	1	0
ANXA11	NEO	TM	2.73	1.12	2.62	1	1	0
MKNK2	NEO	TM	2.73	1.12	2.62	1	1	0
LOC100240735	NEO	TM	2.73	1.45	2.62	1	1	0
AMPD1	NEO	TM	2.72	2.16	2.62	1	1	0
QKI	NEO	TM	2.72	1.1	2.62	1	1	0
ECHDC1	NEO	TM	2.72	3.1	2.62	1	1	0
CBX7	NEO	TM	2.72	1.32	2.62	1	1	0
DENND5A	NEO	TM	2.71	1.12	2.62	1	1	0
FILIP1	NEO	TM	2.71	1.34	2.62	1	1	0
DPY19L2	NEO	TM	2.71	1.23	2.62	1	1	0
COX7A1	NEO	TM	2.7	1.3	2.62	1	1	0
RCBTB2	NEO	TM	2.7	1.16	2.62	1	1	0
SEMA3A	NEO	TM	2.7	1.82	2.62	1	1	0
KL	NEO	TM	2.7	2.1	2.62	1	1	0
RRAGD	NEO	TM	2.7	1.23	2.62	1	1	0
MFNG	NEO	TM	2.7	1.27	2.62	1	1	0
GNAI2	NEO	TM	2.7	1.07	2.62	1	1	0
EEPD1	NEO	TM	2.7	1.31	2.62	1	1	0
43525	NEO	TM	2.7	1.4	2.62	1	1	0
RNASEL	NEO	TM	2.69	1.12	2.62	1	1	0
BTBD6	NEO	TM	2.69	1.2	2.62	1	1	0
GUCY1A2	NEO	TM	2.68	1.34	2.62	1	1	0
BTBD2	NEO	TM	2.68	1.08	2.62	1	1	0
SDPR	NEO	TM	2.68	1.37	2.62	1	1	0
MITF	NEO	TM	2.68	1.23	2.62	1	1	0
UBE2E2	NEO	TM	2.68	1.12	2.62	1	1	0
ITGA9	NEO	TM	2.67	1.19	2.62	1	1	0
PGM5P2	NEO	TM	2.67	1.92	2.62	1	1	0
NFIA	NEO	TM	2.67	1.17	2.62	1	1	0
SLC25A1	NEO	TM	2.67	1.21	2.62	1	1	0
PRAM1	NEO	TM	2.67	1.85	2.62	1	1	0
CALCOCO1	NEO	TM	2.67	1.11	2.62	1	1	0
GEM	NEO	TM	2.67	1.22	2.62	1	1	0
SYT15	NEO	TM	2.67	1.74	2.62	1	1	0
FCHSD2	NEO	TM	2.67	1.26	2.62	1	1	0
AGXT2L2	NEO	TM	2.67	1.16	3.36	1	1	0
CLU	NEO	TM	2.66	1.15	3.36	1	1	0
TTBK2	NEO	TM	2.66	1.1	3.36	1	1	0
CLN6	NEO	TM	2.66	1.13	3.36	1	1	0
TAS2R19	NEO	TM	2.66	1.13	3.36	1	1	0
CCL14	NEO	TM	2.66	1.51	3.36	1	1	0
KANK1	NEO	TM	2.66	1.15	3.36	1	1	0
PDK4	NEO	TM	2.66	1.3	3.36	1	1	0
FZD5	NEO	TM	2.65	2	3.36	1	1	0
OAF	NEO	TM	2.65	1.22	3.36	1	1	0
TPPRB	NEO	TM	2.65	1.2	3.36	1	1	0
MOB3C	NEO	TM	2.65	1.12	3.36	1	1	0
HEXA	NEO	TM	2.65	1.23	3.36	1	1	0
SLC9A9	NEO	TM	2.65	1.19	3.36	1	1	0
EPB41L2	NEO	TM	2.65	1.15	3.36	1	1	0
GDPD5	NEO	TM	2.65	1.75	3.36	1	1	0
PRKAG2	NEO	TM	2.64	1.26	3.36	1	1	0
LIMS1	NEO	TM	2.64	1.07	3.36	1	1	0
GPX4	NEO	TM	2.64	1.08	3.36	1	1	0
STX7	NEO	TM	2.64	1.06	3.36	1	1	0
MRAS	NEO	TM	2.64	1.23	3.36	1	1	0
UCP2	NEO	TM	2.63	1.18	3.36	1	1	0
FAM214B	NEO	TM	2.63	1.3	3.36	1	1	0
WHAMMP1	NEO	TM	2.63	1.12	3.36	1	1	0
RBPJ	NEO	TM	2.63	1.08	3.36	1	1	0
CD68	NEO	TM	2.63	1.14	3.36	1	1	0
MMS19	NEO	TM	2.63	1.08	3.36	1	1	0
EIF3F	NEO	TM	2.63	1.16	3.36	1	1	0
SLC25A51	NEO	TM	2.63	1.1	3.36	1	1	0
YPEL2	NEO	TM	2.62	1.47	3.36	1	1	0
EHD2	NEO	TM	2.62	1.26	3.36	1	1	0
ADH1C	NEO	TM	2.62	1.67	3.36	1	1	0
VSTM4	NEO	TM	2.62	1.31	3.36	1	1	0
HSPB2	NEO	TM	2.62	1.41	3.36	1	1	0
LURAP1	NEO	TM	2.62	1.28	3.36	1	1	0
PDHA1	NEO	TM	2.61	1.07	3.36	1	1	0
NR2F2	NEO	TM	2.61	1.23	3.36	1	1	0
C11orf92	NEO	TM	2.61	2.41	3.36	1	1	0
LPAR1	NEO	TM	2.6	1.15	3.36	1	1	0
SCARF1	NEO	TM	2.6	1.72	3.36	1	1	0
TOB2	NEO	TM	2.6	1.86	3.36	1	1	0
GNB5	NEO	TM	2.6	1.15	3.36	1	1	0
SGTB	NEO	TM	2.6	1.14	3.36	1	1	0
TRAPPC12	NEO	TM	2.6	1.09	3.36	1	1	0
CCL21	NEO	TM	2.6	1.52	3.36	1	1	0
HTR2A	NEO	TM	2.59	1.94	3.36	1	1	0
PRRG3	NEO	TM	2.59	1.95	3.36	1	1	0
FTH1	NEO	TM	2.59	1.07	3.36	1	1	0
EGR1	NEO	TM	2.59	1.54	3.36	1	1	0
CHP1	NEO	TM	2.59	1.1	3.36	1	1	0
SYNRG	NEO	TM	2.59	1.11	3.36	1	1	0
SLIT3	NEO	TM	2.59	1.29	3.36	1	1	0
TBKBP1	NEO	TM	2.59	1.29	3.36	1	1	0
VGLL3	NEO	TM	2.59	1.3	3.36	1	1	0
FAM122A	NEO	TM	2.58	1.13	3.36	1	1	0
OSBPL1A	NEO	TM	2.58	1.08	3.36	1	1	0
PRKAR2B	NEO	TM	2.58	1.17	3.36	1	1	0
PLVAP	NEO	TM	2.58	1.2	3.36	1	1	0
FAM213A	NEO	TM	2.58	1.14	3.36	1	1	0
PBRM1	NEO	TM	2.58	1.06	3.36	1	1	0
GPR133	NEO	TM	2.58	1.65	3.36	1	1	0
JAZF1	NEO	TM	2.58	1.17	3.36	1	1	0
BRI3	NEO	TM	2.57	1.09	3.36	1	1	0
ADAMTS15	NEO	TM	2.57	1.46	3.36	1	1	0
TOR1AIP1	NEO	TM	2.57	1.07	3.36	1	1	0
CPZ	NEO	TM	2.57	1.35	3.36	1	1	0
OSBPL8	NEO	TM	2.57	1.05	3.36	1	1	0
VLDLR	NEO	TM	2.57	1.37	3.36	1	1	0
TPGFR	NEO	TM	2.57	1.5	3.36	1	1	0
FAM13C	NEO	TM	2.57	1.42	3.36	1	1	0
FGD5	NEO	TM	2.56	1.46	3.36	1	1	0
AFAP1L1	NEO	TM	2.56	1.28	3.36	1	1	0
ITGB1BP1	NEO	TM	2.56	1.11	3.36	1	1	0
TKT	NEO	TM	2.56	1.19	3.36	1	1	0
STARD5	NEO	TM	2.56	1.31	3.36	1	1	0
HIPK3	NEO	TM	2.56	1.08	3.36	1	1	0
ITGAD	NEO	TM	2.55	3.3	3.36	1	1	0
PPM1M	NEO	TM	2.55	1.32	3.36	1	1	0
TNNT3	NEO	TM	2.55	1.65	3.36	1	1	0
ADAMTSL1	NEO	TM	2.55	1.46	3.36	1	1	0
TPRF	NEO	TM	2.54	1.14	3.36	1	1	0
ACSL1	NEO	TM	2.54	1.18	3.36	1	1	0
FEM1B	NEO	TM	2.54	1.06	3.36	1	1	0
EPS15	NEO	TM	2.54	1.07	3.36	1	1	0
HBEGF	NEO	TM	2.54	1.32	3.36	1	1	0
FCGRT	NEO	TM	2.54	1.11	3.36	1	1	0
FBLN7	NEO	TM	2.54	1.37	3.36	1	1	0
MIR100HG	NEO	TM	2.54	1.49	3.36	1	1	0
HOXA5	NEO	TM	2.53	1.33	3.36	1	1	0
NID1	NEO	TM	2.53	1.23	3.36	1	1	0
COBLL1	NEO	TM	2.53	1.19	3.36	1	1	0
ADAMTS5	NEO	TM	2.53	1.23	3.36	1	1	0
HTR2B	NEO	TM	2.53	1.43	3.36	1	1	0
AFF1	NEO	TM	2.52	1.17	3.36	1	1	0
IGF2R	NEO	TM	2.52	1.08	3.36	1	1	0
ADAMTSL4	NEO	TM	2.52	2.44	3.36	1	1	0
LAIR1	NEO	TM	2.52	1.2	3.36	1	1	0
PPARA	NEO	TM	2.52	1.24	3.36	1	1	0
LTBP4	NEO	TM	2.52	1.51	3.36	1	1	0
DOCK11	NEO	TM	2.52	1.14	3.36	1	1	0
ANXA5	NEO	TM	2.52	1.06	3.36	1	1	0
TK2	NEO	TM	2.52	1.11	3.36	1	1	0
SAP30L	NEO	TM	2.52	1.07	3.36	1	1	0
C5orf4	NEO	TM	2.52	1.37	3.36	1	1	0
CEP68	NEO	TM	2.51	1.14	3.36	1	1	0
CLEC1A	NEO	TM	2.51	1.28	3.36	1	1	0
ABCA1	NEO	TM	2.51	1.16	3.36	1	1	0
LIPA	NEO	TM	2.51	1.14	3.36	1	1	0
PDE1B	NEO	TM	2.51	1.39	3.36	1	1	0
ANTXR2	NEO	TM	2.51	1.09	3.36	1	1	0
PPM1F	NEO	TM	2.51	1.27	3.36	1	1	0
GIMAP5	NEO	TM	2.51	1.3	3.36	1	1	0
ZRANB1	NEO	TM	2.51	1.06	4.05	1	1	0
RBMS1	NEO	TM	2.51	1.07	4.05	1	1	0
CASQ2	NEO	TM	2.51	1.68	4.05	1	1	0
RAB8B	NEO	TM	2.51	1.11	4.05	1	1	0
ABCA10	NEO	TM	2.51	1.4	4.05	1	1	0
LAMC1	NEO	TM	2.5	1.12	4.05	1	1	0
CHRNA1	NEO	TM	2.5	3.39	4.05	1	1	0
AHNAK	NEO	TM	2.5	1.13	4.05	1	1	0
CAV1	NEO	TM	2.5	1.65	4.05	1	1	0
PDGFRB	NEO	TM	2.5	1.19	4.05	1	1	0
PGPEP1	NEO	TM	2.5	1.13	4.05	1	1	0
DRG2	NEO	TM	2.5	1.1	4.05	1	1	0
NQO2	NEO	TM	2.49	1.1	4.05	1	1	0
AOX1	NEO	TM	2.49	1.31	4.05	1	1	0
SLFN11	NEO	TM	2.49	1.18	4.05	1	1	0
CYYR1	NEO	TM	2.49	1.37	4.05	1	1	0
TENC1	NEO	TM	2.48	1.47	4.05	1	1	0
MTMR9LP	NEO	TM	2.48	1.34	4.05	1	1	0
SNX9	NEO	TM	2.48	1.22	4.05	1	1	0
TMEM47	NEO	TM	2.48	1.21	4.05	1	1	0
ARHGEF10	NEO	TM	2.48	1.2	4.05	1	1	0
RRN3P1	NEO	TM	2.48	1.21	4.05	1	1	0
FUT11	NEO	TM	2.47	1.08	4.05	1	1	0
TMEM245	NEO	TM	2.47	1.07	4.05	1	1	0
CTDSP1	NEO	TM	2.47	1.08	4.05	1	1	0
ACAA2	NEO	TM	2.47	1.09	4.05	1	1	0
MPP1	NEO	TM	2.47	1.17	4.05	1	1	0
JAK1	NEO	TM	2.47	1.07	4.05	1	1	0
TLE4	NEO	TM	2.46	1.23	4.05	1	1	0
DOCK8	NEO	TM	2.46	1.18	4.05	1	1	0
PAMR1	NEO	TM	2.46	1.46	4.05	1	1	0
NEURL1B	NEO	TM	2.46	1.97	4.05	1	1	0
RERGL	NEO	TM	2.46	1.64	4.05	1	1	0
ZFAND5	NEO	TM	2.46	1.09	4.05	1	1	0
HCAR3	NEO	TM	2.46	2.05	4.05	1	1	0
SLC43A3	NEO	TM	2.45	1.14	4.05	1	1	0
NR2F1	NEO	TM	2.45	1.47	4.05	1	1	0
HIGD2A	NEO	TM	2.45	1.07	4.05	1	1	0
PARM1	NEO	TM	2.45	1.24	4.05	1	1	0
TUBG2	NEO	TM	2.45	1.18	4.05	1	1	0
HSD17B11	NEO	TM	2.45	1.11	4.05	1	1	0
TPPLB	NEO	TM	2.45	1.13	4.05	1	1	0
SLC2A5	NEO	TM	2.45	2.31	4.05	1	1	0
MAN2A2	NEO	TM	2.44	1.15	4.05	1	1	0
SYDE1	NEO	TM	2.44	1.32	4.05	1	1	0
FAM208A	NEO	TM	2.44	1.07	4.05	1	1	0
IL6	NEO	TM	2.44	3.38	4.05	1	1	0
DIAPH2	NEO	TM	2.44	1.29	4.05	1	1	0
HERC1	NEO	TM	2.44	1.1	4.05	1	1	0
SNCG	NEO	TM	2.44	1.32	4.05	1	1	0
RPL32P3	NEO	TM	2.44	1.09	4.05	1	1	0
SLC4A4	NEO	TM	2.44	2.37	4.05	1	1	0
CRK	NEO	TM	2.44	1.08	4.05	1	1	0
LAMA4	NEO	TM	2.44	1.15	4.05	1	1	0
RNF130	NEO	TM	2.43	1.07	4.05	1	1	0
CCND2	NEO	TM	2.43	1.14	4.05	1	1	0
KLF6	NEO	TM	2.43	1.15	4.05	1	1	0
SLC26A11	NEO	TM	2.43	1.35	4.05	1	1	0
HECA	NEO	TM	2.43	1.16	4.05	1	1	0
KIAA0141	NEO	TM	2.43	1.09	4.05	1	1	0
FGL2	NEO	TM	2.42	1.18	4.05	1	1	0
FEZ1	NEO	TM	2.42	1.21	4.05	1	1	0
FABP5	NEO	TM	2.42	1.16	4.05	1	1	0
MAMDC2	NEO	TM	2.42	1.33	4.05	1	1	0
CPED1	NEO	TM	2.42	1.19	4.05	1	1	0
RBMS3	NEO	TM	2.42	1.19	4.05	1	1	0
PLD3	NEO	TM	2.42	1.11	4.05	1	1	0
NCF4	NEO	TM	2.41	1.25	4.05	1	1	0
CSDA	NEO	TM	2.41	1.13	4.05	1	1	0
MTMR9	NEO	TM	2.41	1.07	4.05	1	1	0
VWF	NEO	TM	2.41	1.52	4.05	1	1	0
CIDEB	NEO	TM	2.41	1.26	4.05	1	1	0
FOXO3	NEO	TM	2.41	1.2	4.05	1	1	0
LPIN1	NEO	TM	2.41	1.35	4.05	1	1	0
CROCCP2	NEO	TM	2.41	1.22	4.05	1	1	0
TSHZ2	NEO	TM	2.4	1.24	4.05	1	1	0
SIDT2	NEO	TM	2.4	1.11	4.05	1	1	0
ENPEP	NEO	TM	2.4	1.19	4.05	1	1	0
ROCK2	NEO	TM	2.4	1.11	4.05	1	1	0
EMX2OS	NEO	TM	2.4	1.67	4.05	1	1	0
SYNE1	NEO	TM	2.4	1.12	4.05	1	1	0
MYRIP	NEO	TM	2.4	2.12	4.05	1	1	0
DND1	NEO	TM	2.4	1.89	4.05	1	1	0
CPE	NEO	TM	2.4	1.11	4.05	1	1	0
EIF3L	NEO	TM	2.4	1.05	4.05	1	1	0
TTYH2	NEO	TM	2.4	1.3	4.05	1	1	0
CD33	NEO	TM	2.4	1.28	4.05	1	1	0
CLDN11	NEO	TM	2.39	1.37	4.05	1	1	0
SPRY2	NEO	TM	2.39	1.23	4.05	1	1	0
RPL23AP32	NEO	TM	2.39	1.33	4.05	1	1	0
CTSL1	NEO	TM	2.33	1.07	5.01	1	0	0
RHOQ	NEO	TM	2.32	1.11	5.01	1	0	0
TTP1-AS1	NEO	TM	2.32	1.27	5.01	1	0	0
FAM193B	NEO	TM	2.32	1.17	5.01	1	0	0
PDGFD	NEO	TM	2.32	1.3	5.01	1	0	0
GATA6	NEO	TM	2.32	1.37	5.01	1	0	0
GSC	NEO	TM	2.32	1.33	5.01	1	0	0
ARRB2	NEO	TM	2.32	1.15	5.01	1	0	0
ZNF385D	NEO	TM	2.32	1.25	5.01	1	0	0
HCAR2	NEO	TM	2.31	1.94	5.01	1	0	0
TEK	NEO	TM	2.31	1.26	5.01	1	0	0
HSPA12B	NEO	TM	2.31	1.36	5.01	1	0	0
SNX29	NEO	TM	2.31	1.08	5.01	1	0	0
UAP1L1	NEO	TM	2.31	1.36	5.01	1	0	0
ZCCHC24	NEO	TM	2.31	1.2	5.01	1	0	0
C10orf54	NEO	TM	2.31	1.21	5.01	1	0	0
LATS2	NEO	TM	2.31	1.17	5.01	1	0	0
KLF15	NEO	TM	2.31	2.17	5.01	1	0	0
CD300E	NEO	TM	2.31	3.1	5.01	1	0	0
ITM2B	NEO	TM	2.31	1.05	5.01	1	0	0
DCUN1D3	NEO	TM	2.31	1.1	5.01	1	0	0
KAT2B	NEO	TM	2.3	1.18	5.01	1	0	0
EFCAB13	NEO	TM	2.3	2.27	5.01	1	0	0
TACC1	NEO	TM	2.3	1.12	5.01	1	0	0
ZNF835	NEO	TM	2.3	1.37	5.01	1	0	0
GLT25D2	NEO	TM	2.3	2.76	5.01	1	0	0
PDZRN3	NEO	TM	2.3	1.2	5.01	1	0	0
PCYT1A	NEO	TM	2.3	1.06	5.01	1	0	0
EIF1B	NEO	TM	2.3	1.08	5.01	1	0	0
GIMAP8	NEO	TM	2.29	1.2	5.01	1	0	0
SUSD1	NEO	TM	2.29	1.17	5.01	1	0	0
TPP1	NEO	TM	2.29	1.12	5.01	1	0	0
LRRN4CL	NEO	TM	2.29	1.95	5.01	1	0	0
TTC28	NEO	TM	2.29	1.44	5.01	1	0	0
ELTD1	NEO	TM	2.29	1.17	5.01	1	0	0
POLR3GL	NEO	TM	2.29	1.07	5.01	1	0	0
PRKD3	NEO	TM	2.29	1.08	5.01	1	0	0
CLSTN2	NEO	TM	2.29	1.55	5.01	1	0	0
CSDE1	NEO	TM	2.29	1.54	5.01	1	0	0
CACNA2D1	NEO	TM	2.28	1.13	5.01	1	0	0
WIPF2	NEO	TM	2.28	1.16	5.01	1	0	0
RBPMS2	NEO	TM	2.28	1.85	5.01	1	0	0
SOX18	NEO	TM	2.28	1.94	5.01	1	0	0
PPAP2A	NEO	TM	2.28	1.13	5.01	1	0	0
FOLR2	NEO	TM	2.28	1.29	5.01	1	0	0
SASH1	NEO	TM	2.28	1.29	5.01	1	0	0
CDR1	NEO	TM	2.28	1.13	5.01	1	0	0
ME1	NEO	TM	2.28	1.29	5.01	1	0	0
LILRA6	NEO	TM	2.28	1.73	5.01	1	0	0
FADS2	NEO	TM	2.28	1.18	5.01	1	0	0
INPP5E	NEO	TM	2.27	1.75	5.01	1	0	0
IGIP	NEO	TM	2.27	1.11	5.01	1	0	0
ATP6V1B2	NEO	TM	2.27	1.07	5.01	1	0	0
PTPC7	NEO	TM	2.27	1.08	5.01	1	0	0
TBRG1	NEO	TM	2.27	1.09	5.01	1	0	0
GIMAP4	NEO	TM	2.27	1.21	5.01	1	0	0
CSF3R	NEO	TM	2.27	1.17	5.01	1	0	0
HEXB	NEO	TM	2.27	1.06	5.01	1	0	0
ECSCR	NEO	TM	2.27	1.23	5.01	1	0	0
WDR37	NEO	TM	2.26	1.47	5.01	1	0	0
SRM	NEO	TM	2.26	1.11	5.01	1	0	0
MAST3	NEO	TM	2.26	1.33	5.01	1	0	0
HSD17B14	NEO	TM	2.26	1.39	5.01	1	0	0
PDE4DIP	NEO	TM	2.26	1.14	5.01	1	0	0
TPGDS	NEO	TM	2.25	1.34	5.01	1	0	0
NPHP3	NEO	TM	2.25	1.11	5.01	1	0	0
FLJ27354	NEO	TM	2.25	1.43	5.01	1	0	0
RBM5	NEO	TM	2.25	1.09	5.01	1	0	0
ATP2B1	NEO	TM	2.25	1.11	5.01	1	0	0
GALNTL1	NEO	TM	2.25	1.49	5.95	1	0	0
ADAP2	NEO	TM	2.25	1.23	5.95	1	0	0
PPP1R16B	NEO	TM	2.24	1.36	5.95	1	0	0
NOD1	NEO	TM	2.24	1.15	5.95	1	0	0
OLFML1	NEO	TM	2.24	1.18	5.95	1	0	0
TPK1	NEO	TM	2.24	1.21	5.95	1	0	0
DENND6A	NEO	TM	2.24	1.08	5.95	1	0	0
NEK7	NEO	TM	2.24	1.07	5.95	1	0	0
FASN	NEO	TM	2.24	1.24	5.95	1	0	0
NMT2	NEO	TM	2.24	1.16	5.95	1	0	0
FGF14-AS2	NEO	TM	2.23	1.28	5.95	1	0	0
CCDC3	NEO	TM	2.23	1.21	5.95	1	0	0
PODN	NEO	TM	2.23	1.18	5.95	1	0	0
SEC14L1P1	NEO	TM	2.23	1.41	5.95	1	0	0
HDAC4	NEO	TM	2.23	1.14	5.95	1	0	0
ZNF430	NEO	TM	2.23	1.08	5.95	1	0	0
ITM2A	NEO	TM	2.23	1.18	5.95	1	0	0
GNS	NEO	TM	2.22	1.08	5.95	1	0	0
G0S2	NEO	TM	2.22	1.45	5.95	1	0	0
ASMTL	NEO	TM	2.22	1.14	5.95	1	0	0
PPP1R14A	NEO	TM	2.22	1.23	5.95	1	0	0
FXYD6	NEO	TM	2.22	1.18	5.95	1	0	0
DGKA	NEO	TM	2.22	1.18	5.95	1	0	0
DEGS1	NEO	TM	2.22	1.11	5.95	1	0	0
TSPAN3	NEO	TM	2.22	1.06	5.95	1	0	0
MAP3K3	NEO	TM	2.22	1.14	5.95	1	0	0
KLHL20	NEO	TM	2.22	1.07	5.95	1	0	0
HLF	NEO	TM	2.21	1.58	5.95	1	0	0
TOX2	NEO	TM	2.21	2.75	5.95	1	0	0
TPH2R	NEO	TM	2.21	1.64	5.95	1	0	0
FAM107A	NEO	TM	2.21	1.53	5.95	1	0	0
PNMA1	NEO	TM	2.21	1.15	5.95	1	0	0
TFE3	NEO	TM	2.21	1.1	5.95	1	0	0
PCNX	NEO	TM	2.21	1.08	5.95	1	0	0
NR1H3	NEO	TM	2.21	1.22	5.95	1	0	0
PCOLCE	NEO	TM	2.21	1.12	5.95	1	0	0
EFEMP1	NEO	TM	2.21	1.1	5.95	1	0	0
MAML2	NEO	TM	2.21	1.17	5.95	1	0	0
GRIA3	NEO	TM	2.2	1.54	5.95	1	0	0
FAM54B	NEO	TM	2.2	1.08	5.95	1	0	0
PDSS2	NEO	TM	2.2	1.32	5.95	1	0	0
STARD9	NEO	TM	2.2	1.3	5.95	1	0	0
ST6GALNAC3	NEO	TM	2.2	1.3	5.95	1	0	0
PLSCR4	NEO	TM	2.2	1.15	5.95	1	0	0
SNX21	NEO	TM	2.2	1.15	5.95	1	0	0
STAT5B	NEO	TM	2.2	1.1	5.95	1	0	0
TMEM150A	NEO	TM	2.2	1.17	5.95	1	0	0
PIK3R5	NEO	TM	2.2	1.57	5.95	1	0	0
TPK2B	NEO	TM	2.2	1.17	5.95	1	0	0
RUNX1T1	NEO	TM	2.2	1.49	5.95	1	0	0
TLL1	NEO	TM	2.19	1.24	5.95	1	0	0
DYRK4	NEO	TM	2.19	1.59	5.95	1	0	0
SLC25A46	NEO	TM	2.19	1.06	5.95	1	0	0
IKZF5	NEO	TM	2.19	1.1	5.95	1	0	0
LOC100505648	NEO	TM	2.19	1.16	5.95	1	0	0
PHF17	NEO	TM	2.19	1.16	5.95	1	0	0
TNFRSF1B	NEO	TM	2.19	1.25	5.95	1	0	0
LOC100506190	NEO	TM	2.19	1.28	5.95	1	0	0
AKAP17A	NEO	TM	2.19	1.12	5.95	1	0	0
SYK	NEO	TM	2.19	1.18	5.95	1	0	0
HOXD8	NEO	TM	2.19	1.17	5.95	1	0	0
TRPC6	NEO	TM	2.19	1.32	5.95	1	0	0
TPGER4	NEO	TM	2.19	1.36	5.95	1	0	0
ELK4	NEO	TM	2.19	1.08	5.95	1	0	0
43532	NEO	TM	2.18	1.12	5.95	1	0	0
MTHFR	NEO	TM	2.18	1.12	5.95	1	0	0
ACOT9	NEO	TM	2.18	1.09	5.95	1	0	0
GP2	NEO	TM	2.18	3.73	5.95	1	0	0
RFTN2	NEO	TM	2.18	1.21	5.95	1	0	0
SLC48A1	NEO	TM	2.18	1.12	5.95	1	0	0
TTC7B	NEO	TM	2.17	1.18	5.95	1	0	0
REV3L	NEO	TM	2.17	1.1	5.95	1	0	0
C19orf6	NEO	TM	2.17	1.13	5.95	1	0	0
CADM3	NEO	TM	2.17	1.63	5.95	1	0	0
VHL	NEO	TM	2.17	1.09	5.95	1	0	0
IREB2	NEO	TM	2.16	1.05	5.95	1	0	0
DLC1	NEO	TM	2.16	1.22	5.95	1	0	0
F13A1	NEO	TM	2.16	1.14	5.95	1	0	0
TEC	NEO	TM	2.16	1.23	5.95	1	0	0
PROS1	NEO	TM	2.16	1.13	5.95	1	0	0
SNTB1	NEO	TM	2.15	1.25	5.95	1	0	0
ARL10	NEO	TM	2.15	1.32	5.95	1	0	0
FAM69B	NEO	TM	2.15	1.34	5.95	1	0	0
APOBEC3C	NEO	TM	2.15	1.14	5.95	1	0	0
SNX18	NEO	TM	2.15	1.09	5.95	1	0	0
CDH6	NEO	TM	2.15	1.44	5.95	1	0	0
MINK1	NEO	TM	2.15	1.17	5.95	1	0	0
FAM76A	NEO	TM	2.15	1.07	5.95	1	0	0
LIMS2	NEO	TM	2.15	1.32	5.95	1	0	0
LRRC8C	NEO	TM	2.15	1.18	5.95	1	0	0
S100B	NEO	TM	2.15	1.32	5.95	1	0	0
HK2	NEO	TM	2.15	1.17	5.95	1	0	0
SPARCL1	NEO	TM	2.15	1.11	5.95	1	0	0
ABI3BP	NEO	TM	2.14	1.14	5.95	1	0	0
SNHG12	NEO	TM	2.14	1.14	5.95	1	0	0
PCBP1	NEO	TM	2.14	1.05	5.95	1	0	0
POU6F1	NEO	TM	2.14	1.56	5.95	1	0	0
NSMAF	NEO	TM	2.14	1.07	5.95	1	0	0
CEP85L	NEO	TM	2.14	1.16	5.95	1	0	0
ECHS1	NEO	TM	2.14	1.07	5.95	1	0	0
ADAMTS9	NEO	TM	2.14	1.28	5.95	1	0	0
XPO7	NEO	TM	2.14	1.06	5.95	1	0	0
OTUD1	NEO	TM	2.14	1.15	5.95	1	0	0
TNIP1	NEO	TM	2.14	1.11	5.95	1	0	0
CACNB1	NEO	TM	2.14	1.47	5.95	1	0	0
PLEKHG1	NEO	TM	2.13	1.16	7.2	1	0	0
AMDHD2	NEO	TM	2.13	1.14	7.2	1	0	0
PDGFRA	NEO	TM	2.13	1.08	7.2	1	0	0
PCDH12	NEO	TM	2.13	1.5	7.2	1	0	0
ZBTB4	NEO	TM	2.13	1.15	7.2	1	0	0
MUSTN1	NEO	TM	2.13	1.58	7.2	1	0	0
THRA	NEO	TM	2.13	1.21	7.2	1	0	0
PXK	NEO	TM	2.13	1.12	7.2	1	0	0
LIX1L	NEO	TM	2.13	1.12	7.2	1	0	0
MEOX2	NEO	TM	2.13	1.89	7.2	1	0	0
ENTPD4	NEO	TM	2.13	1.11	7.2	1	0	0
FHL5	NEO	TM	2.12	1.46	7.2	1	0	0
CNTNAP3B	NEO	TM	2.12	1.77	7.2	1	0	0
PAFAH1B1	NEO	TM	2.12	1.04	7.2	1	0	0
FCRLA	NEO	TM	2.12	3.35	7.2	1	0	0
KDR	NEO	TM	2.12	1.17	7.2	1	0	0
PELI2	NEO	TM	2.12	1.17	7.2	1	0	0
SAV1	NEO	TM	2.12	1.08	7.2	1	0	0
UTRN	NEO	TM	2.12	1.08	7.2	1	0	0
FOXP1	NEO	TM	2.12	1.1	7.2	1	0	0
LOC644172	NEO	TM	2.12	2.64	7.2	1	0	0
TMTC1	NEO	TM	2.12	1.21	7.2	1	0	0
ZNF395	NEO	TM	2.12	1.15	7.2	1	0	0
PARD3B	NEO	TM	2.11	1.15	7.2	1	0	0
KANK2	NEO	TM	2.11	1.19	7.2	1	0	0
CD14	NEO	TM	2.11	1.13	7.2	1	0	0
EPC2	NEO	TM	2.11	1.06	7.2	1	0	0
PEPD	NEO	TM	2.11	1.08	7.2	1	0	0
JAM2	NEO	TM	2.11	1.21	7.2	1	0	0
EXOG	NEO	TM	2.11	1.1	7.2	1	0	0
ZNF335	NEO	TM	2.11	1.27	7.2	1	0	0
STAG1	NEO	TM	2.11	1.06	7.2	1	0	0
CSF1	NEO	TM	2.11	1.15	7.2	1	0	0
CRIM1	NEO	TM	2.1	1.14	7.2	1	0	0
PDCD1LG2	NEO	TM	2.1	1.21	7.2	1	0	0
CELF2	NEO	TM	2.1	1.39	7.2	1	0	0
PPP2R1B	NEO	TM	2.1	1.14	7.2	1	0	0
PGM1	NEO	TM	2.1	1.12	7.2	1	0	0
SULT1C2	NEO	TM	2.1	2.74	7.2	1	0	0
FBXO42	NEO	TM	2.1	1.08	7.2	1	0	0
DNM2	NEO	TM	2.1	1.17	7.2	1	0	0
HPCAL1	NEO	TM	2.1	1.16	7.2	1	0	0
RDX	NEO	TM	2.1	1.08	7.2	1	0	0
TNKS2	NEO	TM	2.1	1.05	7.2	1	0	0
ITPR1	NEO	TM	2.09	1.15	7.2	1	0	0
FBXO31	NEO	TM	2.09	1.13	7.2	1	0	0
TNFAIP2	NEO	TM	2.09	1.24	7.2	1	0	0
LY86	NEO	TM	2.09	1.18	7.2	1	0	0
GAB3	NEO	TM	2.09	1.34	7.2	1	0	0
SLC46A1	NEO	TM	2.09	1.79	7.2	1	0	0
KIRREL	NEO	TM	2.09	1.19	7.2	1	0	0
ATL3	NEO	TM	2.08	1.07	7.2	1	0	0
STRADB	NEO	TM	2.08	1.16	7.2	1	0	0
PLAGL1	NEO	TM	2.08	1.24	7.2	1	0	0
ZNF266	NEO	TM	2.08	1.09	7.2	1	0	0
DNAJC4	NEO	TM	2.08	1.06	7.2	1	0	0
HNRNPA0	NEO	TM	2.08	1.04	7.2	1	0	0
AGPAT9	NEO	TM	2.08	1.22	7.2	1	0	0
MBD2	NEO	TM	2.08	1.04	7.2	1	0	0
ADHFE1	NEO	TM	2.08	1.56	7.2	1	0	0
GLIPR2	NEO	TM	2.07	1.12	7.2	1	0	0
HOXD9	NEO	TM	2.07	1.51	7.2	1	0	0
ACP5	NEO	TM	2.07	1.16	7.2	1	0	0
FLRT2	NEO	TM	2.07	1.35	7.2	1	0	0
ATP10A	NEO	TM	2.07	1.26	7.2	1	0	0
IRF4	NEO	TM	2.07	1.52	7.2	1	0	0
IDH3G	NEO	TM	2.07	1.06	7.2	1	0	0
RGS5	NEO	TM	2.07	1.12	7.2	1	0	0
NECAB1	NEO	TM	2.07	3.07	7.2	1	0	0
TACR1	NEO	TM	2.07	2.17	7.2	1	0	0
ARHGAP21	NEO	TM	2.06	1.15	7.2	1	0	0
PYGL	NEO	TM	2.06	1.15	7.2	1	0	0
PRKAA1	NEO	TM	2.06	1.1	7.2	1	0	0
SOD3	NEO	TM	2.06	1.29	7.2	1	0	0
DGAT1	NEO	TM	2.06	1.44	7.2	1	0	0
MOCS1	NEO	TM	2.06	1.23	7.2	1	0	0
ALKBH5	NEO	TM	2.06	1.07	7.2	1	0	0
TXNIP	NEO	TM	2.06	1.07	7.2	1	0	0
EMP3	NEO	TM	2.06	1.09	7.2	1	0	0
DFNA5	NEO	TM	2.06	1.2	7.2	1	0	0
TLN2	NEO	TM	2.06	1.27	7.2	1	0	0
RFTN1	NEO	TM	2.06	1.11	7.2	1	0	0
SCIMP	NEO	TM	2.06	1.3	7.2	1	0	0
MEIS1	NEO	TM	2.05	1.18	7.2	1	0	0
SBDSP1	NEO	TM	2.05	1.09	7.2	1	0	0
RASA3	NEO	TM	2.05	1.12	7.2	1	0	0
SLC25A30	NEO	TM	2.05	1.08	7.2	1	0	0
CCL18	NEO	TM	2.05	1.45	7.2	1	0	0
ZNF366	NEO	TM	2.05	1.35	7.2	1	0	0
HPS5	NEO	TM	2.05	1.09	7.2	1	0	0
PIP4K2A	NEO	TM	2.05	1.12	7.2	1	0	0
CBLB	NEO	TM	2.05	1.13	7.2	1	0	0
PRICKLE2	NEO	TM	2.05	1.18	7.2	1	0	0
MRO	NEO	TM	2.05	1.67	7.2	1	0	0
MCTP1	NEO	TM	2.05	1.19	7.2	1	0	0
PLEKHA2	NEO	TM	2.04	1.11	7.2	1	0	0
MCAM	NEO	TM	2.04	1.2	7.2	1	0	0
LOC254128	NEO	TM	2.04	1.17	7.2	1	0	0
NFATC3	NEO	TM	2.04	1.11	7.2	1	0	0
CAPN3	NEO	TM	2.04	1.33	7.2	1	0	0
SMAD6	NEO	TM	2.04	1.42	7.2	1	0	0
EIF2C4	NEO	TM	2.04	1.06	7.2	1	0	0
TGFB1	NEO	TM	2.03	1.15	7.2	1	0	0
MPV17	NEO	TM	2.03	1.05	7.2	1	0	0
RBL2	NEO	TM	2.03	1.08	7.2	1	0	0
NRP1	NEO	TM	2.03	1.12	7.2	1	0	0
EGLN1	NEO	TM	2.03	1.08	8.72	1	0	0
TPCH2	NEO	TM	2.03	1.6	8.72	1	0	0
BMPER	NEO	TM	2.02	1.65	8.72	1	0	0
GPR176	NEO	TM	2.02	1.26	8.72	1	0	0
NLRP1	NEO	TM	2.02	1.25	8.72	1	0	0
MRPS27	NEO	TM	2.02	1.06	8.72	1	0	0
CYP4V2	NEO	TM	2.02	1.17	8.72	1	0	0
RHOBTB2	NEO	TM	2.02	1.17	8.72	1	0	0
DSEL	NEO	TM	2.02	1.2	8.72	1	0	0
FAM219B	NEO	TM	2.02	1.08	8.72	1	0	0
TPRG1L	NEO	TM	2.02	1.07	8.72	1	0	0
LINC00263	NEO	TM	2.02	1.23	8.72	1	0	0
ARHGAP31	NEO	TM	2.01	1.14	8.72	1	0	0
PLCB2	NEO	TM	2.01	1.2	8.72	1	0	0
HBG1	NEO	TM	2.01	1.89	8.72	1	0	0
HHEX	NEO	TM	2.01	1.25	8.72	1	0	0
ACOT2	NEO	TM	2.01	1.17	8.72	1	0	0
SLC27A1	NEO	TM	2.01	1.2	8.72	1	0	0
PROCR	NEO	TM	2.01	1.22	8.72	1	0	0
FAM83F	NEO	TM	-5.27	0.31	0	1	1	1
KRTCAP3	NEO	TM	-4.87	0.35	0	1	1	1
CLDN4	NEO	TM	-4.84	0.47	0	1	1	1
PGM2L1	NEO	TM	-4.7	0.77	0	1	1	1
GRHL1	NEO	TM	-4.56	0.64	0	1	1	1
OVOL2	NEO	TM	-4.54	0.44	0	1	1	1
SMPDL3B	NEO	TM	-4.49	0.38	0	1	1	1
C1orf210	NEO	TM	-4.46	0.4	0	1	1	1
C20orf151	NEO	TM	-4.45	0.24	0	1	1	1
PODXL2	NEO	TM	-4.45	0.55	0	1	1	1
EPCAM	NEO	TM	-4.41	0.61	0	1	1	1
TFAP2A	NEO	TM	-4.31	0.51	0	1	1	1
CDH1	NEO	TM	-4.27	0.68	0	1	1	1
CBX8	NEO	TM	-4.27	0.57	0	1	1	1
ESRP1	NEO	TM	-4.27	0.6	0	1	1	1
CEP89	NEO	TM	-4.22	0.66	0	1	1	1
HMGN1	NEO	TM	-4.21	0.84	0	1	1	1
C20orf72	NEO	TM	-4.15	0.78	0	1	1	1
C1orf172	NEO	TM	-4.11	0.21	0.63	1	1	0
BMPR1B	NEO	TM	-4.09	0.28	0.63	1	1	0
MBOAT2	NEO	TM	-4.07	0.72	0.63	1	1	0
TRPS1	NEO	TM	-4.04	0.8	0.63	1	1	0
TMC4	NEO	TM	-4.01	0.36	0.63	1	1	0
MYCBP	NEO	TM	-3.99	0.71	0.63	1	1	0
RPS14	NEO	TM	-3.98	0.62	0.63	1	1	0
TMEM125	NEO	TM	-3.98	0.24	0.63	1	1	0
PKP3	NEO	TM	-3.98	0.36	0.63	1	1	0
MAL2	NEO	TM	-3.98	0.68	0.63	1	1	0
PPAP2C	NEO	TM	-3.97	0.64	0.63	1	1	0
PRSS22	NEO	TM	-3.97	0.23	0.63	1	1	0
ZNF131	NEO	TM	-3.94	0.82	0.86	1	1	0
ATG16L1	NEO	TM	-3.91	0.79	0.86	1	1	0
MARVELD2	NEO	TM	-3.91	0.59	0.86	1	1	0
FLYWCH2	NEO	TM	-3.83	0.75	0.86	1	1	0
PRSS8	NEO	TM	-3.8	0.59	1.18	1	1	0
CNKSR1	NEO	TM	-3.79	0.35	1.18	1	1	0
CHMP4C	NEO	TM	-3.79	0.61	1.18	1	1	0
ELF3	NEO	TM	-3.78	0.56	1.18	1	1	0
RMI2	NEO	TM	-3.77	0.34	1.18	1	1	0
GRHL2	NEO	TM	-3.73	0.64	1.18	1	1	0
ETP1	NEO	TM	-3.73	0.82	1.18	1	1	0
ZSCAN16	NEO	TM	-3.72	0.77	1.18	1	1	0
AP1M2	NEO	TM	-3.72	0.51	1.18	1	1	0
TMEM5	NEO	TM	-3.71	0.79	1.18	1	1	0
RAB25	NEO	TM	-3.7	0.59	1.18	1	1	0
HIST1H2BD	NEO	TM	-3.7	0.88	1.18	1	1	0
CLDN3	NEO	TM	-3.69	0.5	1.18	1	1	0
PPP1R9A	NEO	TM	-3.69	0.63	1.18	1	1	0
ZNF326	NEO	TM	-3.68	0.8	1.18	1	1	0
KIF13A	NEO	TM	-3.65	0.6	1.18	1	1	0
TRMT61B	NEO	TM	-3.65	0.72	1.18	1	1	0
MAGEF1	NEO	TM	-3.65	0.84	1.18	1	1	0
FAM160A1	NEO	TM	-3.64	0.44	1.18	1	1	0
KRT8	NEO	TM	-3.62	0.7	1.18	1	1	0
AP1AR	NEO	TM	-3.61	0.52	1.18	1	1	0
PRKRIP1	NEO	TM	-3.6	0.87	1.18	1	1	0
PON2	NEO	TM	-3.6	0.78	1.18	1	1	0
CGN	NEO	TM	-3.59	0.27	1.62	1	1	0
SDC4	NEO	TM	-3.58	0.82	1.62	1	1	0
CADM4	NEO	TM	-3.57	0.53	1.62	1	1	0
RFC2	NEO	TM	-3.57	0.87	1.62	1	1	0
KIAA0101	NEO	TM	-3.57	0.4	1.62	1	1	0
BCL2L12	NEO	TM	-3.56	0.87	1.62	1	1	0
CCT3	NEO	TM	-3.56	0.89	1.62	1	1	0
OCIAD2	NEO	TM	-3.54	0.74	1.62	1	1	0
BSPRY	NEO	TM	-3.53	0.6	1.62	1	1	0
SOX4	NEO	TM	-3.52	0.74	1.62	1	1	0
FRK	NEO	TM	-3.51	0.72	1.62	1	1	0
PRRG4	NEO	TM	-3.5	0.42	1.62	1	1	0
SPINT2	NEO	TM	-3.5	0.83	1.62	1	1	0
ESRP2	NEO	TM	-3.49	0.34	1.62	1	1	0
ZNF165	NEO	TM	-3.47	0.41	1.62	1	1	0
HOOK1	NEO	TM	-3.44	0.52	1.62	1	1	0
SASS6	NEO	TM	-3.43	0.78	2.07	1	1	0
LAGE3	NEO	TM	-3.42	0.8	2.07	1	1	0
CALM2	NEO	TM	-3.41	0.93	2.07	1	1	0
RHBDL2	NEO	TM	-3.41	0.28	2.07	1	1	0
PGLS	NEO	TM	-3.41	0.87	2.07	1	1	0
CIAPIN1	NEO	TM	-3.41	0.85	2.07	1	1	0
CANX	NEO	TM	-3.39	0.92	2.07	1	1	0
MTL5	NEO	TM	-3.39	0.15	2.07	1	1	0
YIPF1	NEO	TM	-3.35	0.84	2.07	1	1	0
ZCCHC6	NEO	TM	-3.34	0.84	2.07	1	1	0
RAB17	NEO	TM	-3.33	0.2	2.07	1	1	0
STOML2	NEO	TM	-3.33	0.85	2.07	1	1	0
NEK2	NEO	TM	-3.33	0.25	2.07	1	1	0
FAAH2	NEO	TM	-3.33	0.7	2.07	1	1	0
C19orf21	NEO	TM	-3.32	0.06	2.07	1	1	0
DIAPH3	NEO	TM	-3.32	0.14	2.07	1	1	0
AAGAB	NEO	TM	-3.32	0.88	2.07	1	1	0
ERBB3	NEO	TM	-3.31	0.56	2.07	1	1	0
MAGOHB	NEO	TM	-3.31	0.82	2.07	1	1	0
AP1S1	NEO	TM	-3.31	0.82	2.07	1	1	0
CCDC64B	NEO	TM	-3.29	0.27	2.07	1	1	0
NOMO1	NEO	TM	-3.29	0.88	2.07	1	1	0
TRMT6	NEO	TM	-3.29	0.84	2.07	1	1	0
ZNF354A	NEO	TM	-3.28	0.82	2.07	1	1	0
TMPRSS13	NEO	TM	-3.28	0.49	2.07	1	1	0
TMEM54	NEO	TM	-3.28	0.7	2.07	1	1	0
B4GALNT3	NEO	TM	-3.27	0.2	2.07	1	1	0
GFER	NEO	TM	-3.26	0.8	2.07	1	1	0
ZNF816	NEO	TM	-3.25	0.88	2.07	1	1	0
SPINT1	NEO	TM	-3.25	0.71	2.07	1	1	0
CXADR	NEO	TM	-3.24	0.63	2.07	1	1	0
NME2	NEO	TM	-3.24	0.17	2.07	1	1	0
EEF1E1	NEO	TM	-3.24	0.87	2.07	1	1	0
HIST1H2BF	NEO	TM	-3.24	0.65	2.07	1	1	0
KIFC1	NEO	TM	-3.23	0.37	2.07	1	1	0
TRAPPC11	NEO	TM	-3.23	0.63	2.07	1	1	0
C2orf15	NEO	TM	-3.23	0.61	2.07	1	1	0
ARL6IP1	NEO	TM	-3.21	0.86	2.62	1	1	0
RSBN1L-AS1	NEO	TM	-3.21	0.81	2.62	1	1	0
CRB3	NEO	TM	-3.21	0.25	2.62	1	1	0
B4GALNT4	NEO	TM	-3.21	0.17	2.62	1	1	0
KRT19	NEO	TM	-3.2	0.68	2.62	1	1	0
AUNIP	NEO	TM	-3.2	0.08	2.62	1	1	0
TLCD1	NEO	TM	-3.2	0.49	2.62	1	1	0
PSD4	NEO	TM	-3.19	0.52	2.62	1	1	0
RPL39L	NEO	TM	-3.19	0.59	2.62	1	1	0
STYXL1	NEO	TM	-3.18	0.77	2.62	1	1	0
MAPK8IP2	NEO	TM	-3.17	0.27	2.62	1	1	0
DCTPP1	NEO	TM	-3.17	0.79	2.62	1	1	0
GINS1	NEO	TM	-3.17	0.52	2.62	1	1	0
ADSS	NEO	TM	-3.16	0.87	2.62	1	1	0
FAM83H	NEO	TM	-3.16	0.52	2.62	1	1	0
NR2C2AP	NEO	TM	-3.16	0.77	2.62	1	1	0
SIX4	NEO	TM	-3.15	0.63	2.62	1	1	0
STPBN2	NEO	TM	-3.15	0.41	2.62	1	1	0
PRKCZ	NEO	TM	-3.15	0.6	2.62	1	1	0
KRT18	NEO	TM	-3.15	0.73	2.62	1	1	0
SNRNP27	NEO	TM	-3.15	0.72	2.62	1	1	0
LOC100133315	NEO	TM	-3.14	0.8	2.62	1	1	0
STRBP	NEO	TM	-3.14	0.85	2.62	1	1	0
ETF1	NEO	TM	-3.14	0.87	2.62	1	1	0
PDIA4	NEO	TM	-3.14	0.82	2.62	1	1	0
RAB11FIP4	NEO	TM	-3.13	0.74	2.62	1	1	0
RABGEF1	NEO	TM	-3.13	0.87	2.62	1	1	0
CDK11A	NEO	TM	-3.13	0.73	2.62	1	1	0
USP10	NEO	TM	-3.12	0.88	2.62	1	1	0
PRRG2	NEO	TM	-3.12	0.39	2.62	1	1	0
PRLR	NEO	TM	-3.12	0.56	2.62	1	1	0
SERTAD1	NEO	TM	-3.12	0.72	2.62	1	1	0
DUSP16	NEO	TM	-3.12	0.86	2.62	1	1	0
DPCD	NEO	TM	-3.12	0.75	2.62	1	1	0
CSNK1G1	NEO	TM	-3.11	0.88	2.62	1	1	0
AP4M1	NEO	TM	-3.11	0.69	2.62	1	1	0
HMGCR	NEO	TM	-3.11	0.87	2.62	1	1	0
IL17RB	NEO	TM	-3.1	0.5	2.62	1	1	0
UBE2C	NEO	TM	-3.1	0.62	2.62	1	1	0
RAE1	NEO	TM	-3.1	0.79	2.62	1	1	0
MYO5B	NEO	TM	-3.1	0.67	2.62	1	1	0
CLNS1A	NEO	TM	-3.1	0.89	2.62	1	1	0
RHPN2	NEO	TM	-3.1	0.65	2.62	1	1	0
RHPN1	NEO	TM	-3.1	0.14	2.62	1	1	0
HN1L	NEO	TM	-3.09	0.85	2.62	1	1	0
C21orf59	NEO	TM	-3.09	0.87	2.62	1	1	0
GINS2	NEO	TM	-3.09	0.56	2.62	1	1	0
HDHD3	NEO	TM	-3.09	0.78	2.62	1	1	0
PPAT	NEO	TM	-3.09	0.83	2.62	1	1	0
MSI2	NEO	TM	-3.09	0.83	2.62	1	1	0
RAC3	NEO	TM	-3.08	0.7	2.62	1	1	0
PAQR3	NEO	TM	-3.08	0.78	2.62	1	1	0
LRRC42	NEO	TM	-3.08	0.84	2.62	1	1	0
PBK	NEO	TM	-3.07	0.18	2.62	1	1	0
NUDT15	NEO	TM	-3.07	0.78	2.62	1	1	0
C16orf88	NEO	TM	-3.07	0.8	2.62	1	1	0
TSEN34	NEO	TM	-3.06	0.89	2.62	1	1	0
CYB5R2	NEO	TM	-3.06	0.6	2.62	1	1	0
SLC52A3	NEO	TM	-3.06	0.43	2.62	1	1	0
PROM2	NEO	TM	-3.06	0.54	2.62	1	1	0
CD3EAP	NEO	TM	-3.06	0.78	2.62	1	1	0
TUFT1	NEO	TM	-3.06	0.72	2.62	1	1	0
PERP	NEO	TM	-3.05	0.71	2.62	1	1	0
RBMX2	NEO	TM	-3.05	0.76	2.62	1	1	0
ZNF606	NEO	TM	-3.03	0.67	2.62	1	1	0
IRF6	NEO	TM	-3.03	0.66	2.62	1	1	0
HMGCS1	NEO	TM	-3.03	0.82	2.62	1	1	0
DTL	NEO	TM	-3.03	0.47	2.62	1	1	0
HIST1H3D	NEO	TM	-3.03	0.7	2.62	1	1	0
RNASEH2A	NEO	TM	-3.02	0.83	2.62	1	1	0
CELF1	NEO	TM	-3.02	0.85	2.62	1	1	0
SNRPB2	NEO	TM	-3.02	0.89	2.62	1	1	0
SDC1	NEO	TM	-3.02	0.77	2.62	1	1	0
LIPH	NEO	TM	-3.02	0.31	2.62	1	1	0
CBLC	NEO	TM	-3.01	0.33	2.62	1	1	0
SEZ6L2	NEO	TM	-3.01	0.3	2.62	1	1	0
FAM155A	NEO	TM	-3	0.24	2.62	1	1	0
BPNT1	NEO	TM	-3	0.73	2.62	1	1	0
CCDC24	NEO	TM	-2.99	0.36	2.62	1	1	0
APEX2	NEO	TM	-2.99	0.76	2.62	1	1	0
TACSTD2	NEO	TM	-2.99	0.64	2.62	1	1	0
CD9	NEO	TM	-2.99	0.9	2.62	1	1	0
LRRCC1	NEO	TM	-2.98	0.81	2.62	1	1	0
SRPK1	NEO	TM	-2.98	0.86	2.62	1	1	0
RASSF7	NEO	TM	-2.96	0.53	2.62	1	1	0
ATP5I	NEO	TM	-2.96	0.89	2.62	1	1	0
PSENEN	NEO	TM	-2.96	0.83	2.62	1	1	0
NOMO3	NEO	TM	-2.96	0.63	2.62	1	1	0
HSPH1	NEO	TM	-2.96	0.83	2.62	1	1	0
CDCA8	NEO	TM	-2.96	0.26	2.62	1	1	0
RUSC1	NEO	TM	-2.95	0.81	2.62	1	1	0
LYPD3	NEO	TM	-2.95	0.7	2.62	1	1	0
BRMS1	NEO	TM	-2.95	0.88	2.62	1	1	0
TRIT1	NEO	TM	-2.95	0.77	2.62	1	1	0
PSMD1	NEO	TM	-2.95	0.93	3.36	1	1	0
C11orf52	NEO	TM	-2.94	0.54	3.36	1	1	0
TPPN3	NEO	TM	-2.94	0.7	3.36	1	1	0
KIAA1609	NEO	TM	-2.94	0.78	3.36	1	1	0
ACTL6A	NEO	TM	-2.94	0.84	3.36	1	1	0
BAZ1B	NEO	TM	-2.94	0.87	3.36	1	1	0
IGSF8	NEO	TM	-2.93	0.76	3.36	1	1	0
MAN1B1	NEO	TM	-2.93	0.65	3.36	1	1	0
ARSE	NEO	TM	-2.93	0.59	3.36	1	1	0
MRPS17	NEO	TM	-2.93	0.85	3.36	1	1	0
IGSF9	NEO	TM	-2.93	0.38	3.36	1	1	0
CLDN12	NEO	TM	-2.93	0.83	3.36	1	1	0
PAFAH1B3	NEO	TM	-2.93	0.74	3.36	1	1	0
BAIAP2L1	NEO	TM	-2.92	0.69	3.36	1	1	0
E2F1	NEO	TM	-2.92	0.53	3.36	1	1	0
MCU	NEO	TM	-2.92	0.84	3.36	1	1	0
HNRNPA3	NEO	TM	-2.92	0.83	3.36	1	1	0
OIP5	NEO	TM	-2.92	0.38	3.36	1	1	0
CDC123	NEO	TM	-2.92	0.94	3.36	1	1	0
FEM1A	NEO	TM	-2.91	0.75	3.36	1	1	0
DDR1	NEO	TM	-2.91	0.76	3.36	1	1	0
SOX12	NEO	TM	-2.91	0.76	3.36	1	1	0
ERCC6L	NEO	TM	-2.9	0.25	3.36	1	1	0
UBAC1	NEO	TM	-2.9	0.82	3.36	1	1	0
FAM103A1	NEO	TM	-2.9	0.84	3.36	1	1	0
RAD51	NEO	TM	-2.9	0.4	3.36	1	1	0
CSTF1	NEO	TM	-2.9	0.86	3.36	1	1	0
MXD3	NEO	TM	-2.89	0.38	3.36	1	1	0
MRPL15	NEO	TM	-2.89	0.88	3.36	1	1	0
GPR89A	NEO	TM	-2.89	0.89	3.36	1	1	0
PLXNB1	NEO	TM	-2.89	0.72	3.36	1	1	0
SDHB	NEO	TM	-2.89	0.85	3.36	1	1	0
CDS1	NEO	TM	-2.89	0.54	3.36	1	1	0
SPAG1	NEO	TM	-2.89	0.58	3.36	1	1	0
HIST1H4H	NEO	TM	-2.88	0.92	3.36	1	1	0
TOMM34	NEO	TM	-2.88	0.89	3.36	1	1	0
BUD31	NEO	TM	-2.88	0.92	3.36	1	1	0
TTK	NEO	TM	-2.88	0.34	3.36	1	1	0
OCLN	NEO	TM	-2.87	0.62	3.36	1	1	0
DNAH14	NEO	TM	-2.87	0.26	3.36	1	1	0
TPD52	NEO	TM	-2.87	0.8	3.36	1	1	0
PARD6B	NEO	TM	-2.87	0.6	3.36	1	1	0
LRRC8E	NEO	TM	-2.86	0.31	3.36	1	1	0
CDC6	NEO	TM	-2.86	0.47	3.36	1	1	0
IGSF3	NEO	TM	-2.86	0.68	3.36	1	1	0
RRS1	NEO	TM	-2.85	0.88	3.36	1	1	0
APEX1	NEO	TM	-2.85	0.92	3.36	1	1	0
MYEF2	NEO	TM	-2.85	0.76	3.36	1	1	0
HMGB3	NEO	TM	-2.84	0.77	3.36	1	1	0
ZCRB1	NEO	TM	-2.84	0.87	3.36	1	1	0
PPIA	NEO	TM	-2.84	0.95	3.36	1	1	0
S100P	NEO	TM	-2.84	0.35	3.36	1	1	0
WFDC2	NEO	TM	-2.84	0.59	3.36	1	1	0
FKBP4	NEO	TM	-2.84	0.85	3.36	1	1	0
CDC20	NEO	TM	-2.83	0.18	3.36	1	1	0
HJURP	NEO	TM	-2.82	0.57	3.36	1	1	0
TIMM8A	NEO	TM	-2.82	0.8	3.36	1	1	0
TOM1L1	NEO	TM	-2.82	0.8	3.36	1	1	0
GPR89C	NEO	TM	-2.82	0.8	3.36	1	1	0
DNAJA3	NEO	TM	-2.82	0.86	3.36	1	1	0
MLF1	NEO	TM	-2.82	0.71	3.36	1	1	0
WDYHV1	NEO	TM	-2.82	0.81	3.36	1	1	0
KIF2C	NEO	TM	-2.81	0.46	3.36	1	1	0
WDR3	NEO	TM	-2.81	0.84	3.36	1	1	0
PDE6D	NEO	TM	-2.81	0.88	3.36	1	1	0
FAM83B	NEO	TM	-2.8	0.48	3.36	1	1	0
ELMO3	NEO	TM	-2.8	0.67	3.36	1	1	0
C12orf4	NEO	TM	-2.8	0.76	3.36	1	1	0
BUB1	NEO	TM	-2.8	0.57	3.36	1	1	0
CNIH4	NEO	TM	-2.8	0.91	3.36	1	1	0
EEF1A2	NEO	TM	-2.79	0.17	3.36	1	1	0
SETD8	NEO	TM	-2.79	0.68	3.36	1	1	0
MATN3	NEO	TM	-2.79	0.55	3.36	1	1	0
USP54	NEO	TM	-2.79	0.82	3.36	1	1	0
PYCR1	NEO	TM	-2.79	0.75	3.36	1	1	0
SEC24A	NEO	TM	-2.78	0.9	3.36	1	1	0
SNORA2A	NEO	TM	-2.78	0.75	3.36	1	1	0
SCUBE3	NEO	TM	-2.78	0.28	3.36	1	1	0
C8orf76	NEO	TM	-2.78	0.89	3.36	1	1	0
RAP1GAP	NEO	TM	-2.77	0.36	3.36	1	1	0
SHFM1	NEO	TM	-2.77	0.94	3.36	1	1	0
HSPA1B	NEO	TM	-2.77	0.83	3.36	1	1	0
PRR15L	NEO	TM	-2.76	0.54	3.36	1	1	0
TPM3	NEO	TM	-2.76	0.93	3.36	1	1	0
FYTTD1	NEO	TM	-2.76	0.86	3.36	1	1	0
PRPF4	NEO	TM	-2.76	0.89	3.36	1	1	0
ZNF250	NEO	TM	-2.76	0.79	3.36	1	1	0
COL10A1	NEO	TM	-2.75	0.58	3.36	1	1	0
TPPLAD1	NEO	TM	-2.75	0.88	3.36	1	1	0
LMAN1	NEO	TM	-2.75	0.82	4.05	1	1	0
TPRKB	NEO	TM	-2.74	0.89	4.05	1	1	0
KIAA1244	NEO	TM	-2.74	0.46	4.05	1	1	0
ZG16B	NEO	TM	-2.74	0.53	4.05	1	1	0
ANLN	NEO	TM	-2.74	0.61	4.05	1	1	0
LINC00174	NEO	TM	-2.74	0.74	4.05	1	1	0
WDHD1	NEO	TM	-2.73	0.71	4.05	1	1	0
DNAJC24	NEO	TM	-2.73	0.8	4.05	1	1	0
FOLH1	NEO	TM	-2.73	0.59	4.05	1	1	0
MRTO4	NEO	TM	-2.73	0.88	4.05	1	1	0
MCM8	NEO	TM	-2.73	0.8	4.05	1	1	0
ECT2	NEO	TM	-2.73	0.69	4.05	1	1	0
TMED3	NEO	TM	-2.72	0.89	4.05	1	1	0
KIAA1549	NEO	TM	-2.72	0.19	4.05	1	1	0
FAM136A	NEO	TM	-2.72	0.89	4.05	1	1	0
TRAF4	NEO	TM	-2.71	0.81	4.05	1	1	0
HOMER2	NEO	TM	-2.71	0.71	4.05	1	1	0
GAS8	NEO	TM	-2.71	0.79	4.05	1	1	0
TTC26	NEO	TM	-2.71	0.73	4.05	1	1	0
STAMBP	NEO	TM	-2.71	0.91	4.05	1	1	0
NOMO2	NEO	TM	-2.71	0.85	4.05	1	1	0
C1orf51	NEO	TM	-2.71	0.44	4.05	1	1	0
ZWINT	NEO	TM	-2.71	0.71	4.05	1	1	0
PVRL4	NEO	TM	-2.7	0.26	4.05	1	1	0
POC1A	NEO	TM	-2.7	0.18	4.05	1	1	0
GTPBP4	NEO	TM	-2.7	0.89	4.05	1	1	0
GRP	NEO	TM	-2.7	0.44	4.05	1	1	0
GPRC5A	NEO	TM	-2.7	0.5	4.05	1	1	0
CDK5	NEO	TM	-2.7	0.82	4.05	1	1	0
ATP2C2	NEO	TM	-2.7	0.16	4.05	1	1	0
NDUFA4	NEO	TM	-2.69	0.92	4.05	1	1	0
NEBL	NEO	TM	-2.69	0.66	4.05	1	1	0
PAICS	NEO	TM	-2.69	0.85	4.05	1	1	0
BIRC5	NEO	TM	-2.69	0.42	4.05	1	1	0
PACSIN3	NEO	TM	-2.69	0.73	4.05	1	1	0
MRPS35	NEO	TM	-2.68	0.91	4.05	1	1	0
BRIX1	NEO	TM	-2.68	0.9	4.05	1	1	0
C9orf89	NEO	TM	-2.68	0.86	4.05	1	1	0
WDR34	NEO	TM	-2.68	0.78	4.05	1	1	0
C11orf84	NEO	TM	-2.68	0.71	4.05	1	1	0
CCNB2	NEO	TM	-2.68	0.61	4.05	1	1	0
RPPH1	NEO	TM	-2.67	0.95	4.05	1	1	0
STAP2	NEO	TM	-2.67	0.72	4.05	1	1	0
PDXDC1	NEO	TM	-2.67	0.74	4.05	1	1	0
NIPSNAP1	NEO	TM	-2.67	0.86	4.05	1	1	0
NMRAL1	NEO	TM	-2.67	0.89	4.05	1	1	0
TCTEX1D2	NEO	TM	-2.67	0.61	4.05	1	1	0
DHTKD1	NEO	TM	-2.67	0.78	4.05	1	1	0
PSMD14	NEO	TM	-2.67	0.91	4.05	1	1	0
KCNK1	NEO	TM	-2.67	0.63	4.05	1	1	0
MND1	NEO	TM	-2.66	0.4	4.05	1	1	0
XPO5	NEO	TM	-2.66	0.85	4.05	1	1	0
SYT12	NEO	TM	-2.66	0.32	4.05	1	1	0
RTKN	NEO	TM	-2.66	0.69	4.05	1	1	0
MFAP3L	NEO	TM	-2.66	0.64	4.05	1	1	0
OVOL1	NEO	TM	-2.66	0.19	4.05	1	1	0
PDF	NEO	TM	-2.66	0.71	4.05	1	1	0
BAMBI	NEO	TM	-2.66	0.69	4.05	1	1	0
WEE1	NEO	TM	-2.66	0.87	4.05	1	1	0
SLC35B2	NEO	TM	-2.66	0.83	4.05	1	1	0
RBM42	NEO	TM	-2.65	0.83	4.05	1	1	0
SAMD12	NEO	TM	-2.64	0.71	4.05	1	1	0
STRA13	NEO	TM	-2.64	0.77	4.05	1	1	0
GLB1L2	NEO	TM	-2.64	0.34	4.05	1	1	0
TARS	NEO	TM	-2.64	0.92	4.05	1	1	0
CCNB1	NEO	TM	-2.64	0.65	4.05	1	1	0
CHCHD2	NEO	TM	-2.64	0.95	4.05	1	1	0
STX3	NEO	TM	-2.64	0.86	4.05	1	1	0
HSD17B10	NEO	TM	-2.64	0.89	4.05	1	1	0
EPHA1	NEO	TM	-2.64	0.8	4.05	1	1	0
TSPAN17	NEO	TM	-2.63	0.85	4.05	1	1	0
FAM83D	NEO	TM	-2.63	0.35	4.05	1	1	0
RUVBL1	NEO	TM	-2.63	0.89	4.05	1	1	0
AK2	NEO	TM	-2.63	0.9	4.05	1	1	0
FLJ23867	NEO	TM	-2.63	0.75	4.05	1	1	0
UBE2T	NEO	TM	-2.63	0.71	4.05	1	1	0
MB	NEO	TM	-2.63	0.48	4.05	1	1	0
MRPS33	NEO	TM	-2.62	0.83	4.05	1	1	0
TOP2A	NEO	TM	-2.62	0.69	4.05	1	1	0
NCR3LG1	NEO	TM	-2.62	0.53	4.05	1	1	0
FANCL	NEO	TM	-2.62	0.87	4.05	1	1	0
MYO6	NEO	TM	-2.62	0.84	4.05	1	1	0
SLC39A11	NEO	TM	-2.62	0.77	4.05	1	1	0
PMS2	NEO	TM	-2.61	0.84	4.05	1	1	0
CDC45	NEO	TM	-2.61	0.25	4.05	1	1	0
C12orf52	NEO	TM	-2.61	0.77	4.05	1	1	0
THAP4	NEO	TM	-2.61	0.89	4.05	1	1	0
TMEM168	NEO	TM	-2.61	0.66	4.05	1	1	0
PPP1R14B	NEO	TM	-2.61	0.91	4.05	1	1	0
TFAP2C	NEO	TM	-2.6	0.68	4.05	1	1	0
INADL	NEO	TM	-2.6	0.83	4.05	1	1	0
SLC38A1	NEO	TM	-2.59	0.82	4.05	1	1	0
SFXN2	NEO	TM	-2.59	0.76	4.05	1	1	0
CABYR	NEO	TM	-2.59	0.41	4.05	1	1	0
PLS1	NEO	TM	-2.59	0.72	4.05	1	1	0
CKS2	NEO	TM	-2.59	0.68	4.05	1	1	0
G2E3	NEO	TM	-2.59	0.84	4.05	1	1	0
HIST1H2AI	NEO	TM	-2.59	0.22	4.05	1	1	0
MCM10	NEO	TM	-2.59	0.4	4.05	1	1	0
PAPSS1	NEO	TM	-2.59	0.88	4.05	1	1	0
CDCA2	NEO	TM	-2.58	0.15	4.05	1	1	0
IQCK	NEO	TM	-2.58	0.72	4.05	1	1	0
TPK6	NEO	TM	-2.58	0.11	5.01	1	0	0
STARD10	NEO	TM	-2.58	0.77	5.01	1	0	0
KIF23	NEO	TM	-2.58	0.08	5.01	1	0	0
EZH2	NEO	TM	-2.58	0.7	5.01	1	0	0
RFC5	NEO	TM	-2.58	0.68	5.01	1	0	0
CXorf40B	NEO	TM	-2.58	0.86	5.01	1	0	0
NSUN5	NEO	TM	-2.57	0.83	5.01	1	0	0
ZNF627	NEO	TM	-2.57	0.71	5.01	1	0	0
C5orf22	NEO	TM	-2.57	0.87	5.01	1	0	0
HNRNPR	NEO	TM	-2.57	0.93	5.01	1	0	0
SERAC1	NEO	TM	-2.56	0.78	5.01	1	0	0
ZDHHC13	NEO	TM	-2.56	0.86	5.01	1	0	0
UFC1	NEO	TM	-2.56	0.9	5.01	1	0	0
PSMB4	NEO	TM	-2.56	0.94	5.01	1	0	0
SHROOM3	NEO	TM	-2.56	0.64	5.01	1	0	0
MAP3K9	NEO	TM	-2.55	0.62	5.01	1	0	0
ICA1	NEO	TM	-2.55	0.77	5.01	1	0	0
BANP	NEO	TM	-2.55	0.79	5.01	1	0	0
MAPRE1	NEO	TM	-2.55	0.95	5.01	1	0	0
LRRC1	NEO	TM	-2.55	0.71	5.01	1	0	0
KIF24	NEO	TM	-2.55	0.44	5.01	1	0	0
ZMPSTE24	NEO	TM	-2.54	0.89	5.01	1	0	0
LOC100506668	NEO	TM	-2.54	0.73	5.01	1	0	0
SLC12A8	NEO	TM	-2.54	0.48	5.01	1	0	0
CKS1B	NEO	TM	-2.54	0.85	5.01	1	0	0
SNRPG	NEO	TM	-2.54	0.87	5.01	1	0	0
FAM110C	NEO	TM	-2.54	0.42	5.01	1	0	0
PMAIP1	NEO	TM	-2.54	0.66	5.01	1	0	0
SLC35A2	NEO	TM	-2.54	0.79	5.01	1	0	0
CCDC64	NEO	TM	-2.53	0.64	5.01	1	0	0
GMDS	NEO	TM	-2.42	0.74	5.95	1	0	0
FARSB	NEO	TM	-2.41	0.85	5.95	1	0	0
SH3YL1	NEO	TM	-2.41	0.89	5.95	1	0	0
ATAD5	NEO	TM	-2.41	0.54	5.95	1	0	0
TMEM194A	NEO	TM	-2.41	0.73	5.95	1	0	0
NUF2	NEO	TM	-2.4	0.4	5.95	1	0	0
PIFO	NEO	TM	-2.4	0.4	5.95	1	0	0
TDRKH	NEO	TM	-2.4	0.82	5.95	1	0	0
AKAP1	NEO	TM	-2.4	0.86	5.95	1	0	0
CLDN7	NEO	TM	-2.4	0.7	5.95	1	0	0
OCRL	NEO	TM	-2.4	0.67	5.95	1	0	0
MRPS30	NEO	TM	-2.4	0.85	5.95	1	0	0
C16orf59	NEO	TM	-2.4	0.05	5.95	1	0	0
ARHGAP8	NEO	TM	-2.4	0.78	5.95	1	0	0
RPP38	NEO	TM	-2.39	0.77	5.95	1	0	0
SHROOM2	NEO	TM	-2.39	0.31	5.95	1	0	0
HIST1H1B	NEO	TM	-2.39	0.73	5.95	1	0	0
SSBP1	NEO	TM	-2.39	0.94	5.95	1	0	0
WWC1	NEO	TM	-2.39	0.78	5.95	1	0	0
MLEC	NEO	TM	-2.39	0.92	5.95	1	0	0
GK5	NEO	TM	-2.39	0.87	5.95	1	0	0
TIAM2	NEO	TM	-2.39	0.66	5.95	1	0	0
C11orf80	NEO	TM	-2.39	0.74	5.95	1	0	0
SYT7	NEO	TM	-2.39	0.73	5.95	1	0	0
DSP	NEO	TM	-2.39	0.8	5.95	1	0	0
CLCN3	NEO	TM	-2.38	0.83	5.95	1	0	0
IDH3B	NEO	TM	-2.38	0.88	5.95	1	0	0
TTC39A	NEO	TM	-2.38	0.49	5.95	1	0	0
CCNA2	NEO	TM	-2.38	0.65	5.95	1	0	0
MBTD1	NEO	TM	-2.38	0.9	5.95	1	0	0
TMEM139	NEO	TM	-2.38	0.37	5.95	1	0	0
CHD7	NEO	TM	-2.38	0.61	5.95	1	0	0
FLJ22184	NEO	TM	-2.38	0.15	5.95	1	0	0
CCP110	NEO	TM	-2.37	0.89	5.95	1	0	0
TRAPPC3	NEO	TM	-2.37	0.89	5.95	1	0	0
CENPN	NEO	TM	-2.37	0.76	5.95	1	0	0
NDUFAB1	NEO	TM	-2.37	0.93	5.95	1	0	0
FAM111B	NEO	TM	-2.37	0.57	5.95	1	0	0
NUPR1L	NEO	TM	-2.37	0.21	5.95	1	0	0
MAP3K13	NEO	TM	-2.36	0.72	5.95	1	0	0
CA13	NEO	TM	-2.36	0.77	5.95	1	0	0
TRIM45	NEO	TM	-2.36	0.52	5.95	1	0	0
SUMO1P3	NEO	TM	-2.36	0.93	5.95	1	0	0
HIST1H4A	NEO	TM	-2.36	0.79	5.95	1	0	0
LOC285359	NEO	TM	-2.36	0.85	5.95	1	0	0
DSG2	NEO	TM	-2.36	0.77	5.95	1	0	0
BUB1B	NEO	TM	-2.36	0.57	5.95	1	0	0
MCAT	NEO	TM	-2.36	0.82	5.95	1	0	0
CAPS	NEO	TM	-2.36	0.69	5.95	1	0	0
CTNNB1	NEO	TM	-2.36	0.95	5.95	1	0	0
KIAA1199	NEO	TM	-2.35	0.27	5.95	1	0	0
FAM207A	NEO	TM	-2.35	0.85	5.95	1	0	0
TAF12	NEO	TM	-2.35	0.9	5.95	1	0	0
ARHGAP32	NEO	TM	-2.35	0.83	5.95	1	0	0
BANF1	NEO	TM	-2.35	0.91	5.95	1	0	0
CHAF1B	NEO	TM	-2.35	0.7	5.95	1	0	0
FZD3	NEO	TM	-2.34	0.8	5.95	1	0	0
UBE2V2	NEO	TM	-2.34	0.94	5.95	1	0	0
ITGB8	NEO	TM	-2.34	0.69	5.95	1	0	0
DNAJC25	NEO	TM	-2.34	0.85	5.95	1	0	0
SLC44A3	NEO	TM	-2.34	0.4	5.95	1	0	0
DPY30	NEO	TM	-2.34	0.92	5.95	1	0	0
COL8A1	NEO	TM	-2.34	0.8	5.95	1	0	0
CMAS	NEO	TM	-2.34	0.91	5.95	1	0	0
PIBF1	NEO	TM	-2.34	0.83	5.95	1	0	0
PMS2P5	NEO	TM	-2.34	0.89	5.95	1	0	0
PLEKHB1	NEO	TM	-2.34	0.79	5.95	1	0	0
CENPF	NEO	TM	-2.34	0.71	5.95	1	0	0
NOX4	NEO	TM	-2.33	0.76	5.95	1	0	0
SERTAD4	NEO	TM	-2.33	0.67	5.95	1	0	0
KIAA1324	NEO	TM	-2.33	0.77	5.95	1	0	0
INSIG2	NEO	TM	-2.33	0.84	5.95	1	0	0
LSG1	NEO	TM	-2.33	0.81	5.95	1	0	0
PHTF1	NEO	TM	-2.33	0.84	5.95	1	0	0
CBWD6	NEO	TM	-2.33	0.81	5.95	1	0	0
TCEB2	NEO	TM	-2.33	0.93	5.95	1	0	0
PLEKHA7	NEO	TM	-2.32	0.79	5.95	1	0	0
CCDC34	NEO	TM	-2.32	0.81	5.95	1	0	0
ASNS	NEO	TM	-2.32	0.83	5.95	1	0	0
FAM120AOS	NEO	TM	-2.32	0.56	5.95	1	0	0
LINC00665	NEO	TM	-2.32	0.77	5.95	1	0	0
BTG3	NEO	TM	-2.32	0.77	5.95	1	0	0
ZNF720	NEO	TM	-2.32	0.67	5.95	1	0	0
DNAJC9	NEO	TM	-2.31	0.89	5.95	1	0	0
RRP36	NEO	TM	-2.31	0.91	5.95	1	0	0
CCNE2	NEO	TM	-2.31	0.46	5.95	1	0	0
ZNF138	NEO	TM	-2.31	0.84	5.95	1	0	0
CIB1	NEO	TM	-2.31	0.91	5.95	1	0	0
PLK4	NEO	TM	-2.31	0.58	5.95	1	0	0
USP1	NEO	TM	-2.31	0.88	5.95	1	0	0
LMNB2	NEO	TM	-2.3	0.82	5.95	1	0	0
RIPK4	NEO	TM	-2.3	0.55	5.95	1	0	0
CCDC59	NEO	TM	-2.3	0.86	5.95	1	0	0
POLR2G	NEO	TM	-2.3	0.91	5.95	1	0	0
ROGDI	NEO	TM	-2.3	0.73	5.95	1	0	0
SCARNA7	NEO	TM	-2.3	0.97	5.95	1	0	0
ENPP5	NEO	TM	-2.3	0.7	5.95	1	0	0
CHAC2	NEO	TM	-2.3	0.55	5.95	1	0	0
PAIP1	NEO	TM	-2.3	0.93	5.95	1	0	0
TMEM79	NEO	TM	-2.3	0.64	5.95	1	0	0
CCDC19	NEO	TM	-2.3	0.33	5.95	1	0	0
CDCA5	NEO	TM	-2.3	0.44	5.95	1	0	0
NR2F6	NEO	TM	-2.29	0.79	5.95	1	0	0
KLHDC9	NEO	TM	-2.29	0.47	5.95	1	0	0
ANKS3	NEO	TM	-2.29	0.78	5.95	1	0	0
AP1G2	NEO	TM	-2.29	0.86	5.95	1	0	0
ESM1	NEO	TM	-2.29	0.42	5.95	1	0	0
FASTKD5	NEO	TM	-2.29	0.83	5.95	1	0	0
TPX2	NEO	TM	-2.29	0.66	5.95	1	0	0
TIMM50	NEO	TM	-2.29	0.67	5.95	1	0	0
FBXO22	NEO	TM	-2.29	0.88	5.95	1	0	0
NCAPG	NEO	TM	-2.28	0.55	5.95	1	0	0
BOLA3	NEO	TM	-2.28	0.85	5.95	1	0	0
EBNA1BP2	NEO	TM	-2.28	0.92	7.2	1	0	0
DDX21	NEO	TM	-2.28	0.92	7.2	1	0	0
ZNF121	NEO	TM	-2.28	0.95	7.2	1	0	0
SNORA71A	NEO	TM	-2.28	0.85	7.2	1	0	0
ZCCHC2	NEO	TM	-2.28	0.83	7.2	1	0	0
FAM98B	NEO	TM	-2.28	0.83	7.2	1	0	0
FAM169A	NEO	TM	-2.28	0.72	7.2	1	0	0
MLF1IP	NEO	TM	-2.27	0.71	7.2	1	0	0
MAP9	NEO	TM	-2.27	0.72	7.2	1	0	0
C4orf48	NEO	TM	-2.27	0.64	7.2	1	0	0
FARS2	NEO	TM	-2.27	0.9	7.2	1	0	0
MARCKSL1	NEO	TM	-2.27	0.76	7.2	1	0	0
CORO2A	NEO	TM	-2.26	0.75	7.2	1	0	0
TRUB1	NEO	TM	-2.26	0.9	7.2	1	0	0
SLC25A40	NEO	TM	-2.26	0.87	7.2	1	0	0
PPP1R16A	NEO	TM	-2.26	0.77	7.2	1	0	0
SLC25A13	NEO	TM	-2.26	0.91	7.2	1	0	0
SUSD4	NEO	TM	-2.26	0.39	7.2	1	0	0
IRX5	NEO	TM	-2.26	0.57	7.2	1	0	0
FANCI	NEO	TM	-2.25	0.69	7.2	1	0	0
N4BP2	NEO	TM	-2.25	0.85	7.2	1	0	0
SVIP	NEO	TM	-2.25	0.81	7.2	1	0	0
AGSK1	NEO	TM	-2.25	0.74	7.2	1	0	0
SAE1	NEO	TM	-2.25	0.92	7.2	1	0	0
RASEF	NEO	TM	-2.25	0.61	7.2	1	0	0
CELSR2	NEO	TM	-2.25	0.53	7.2	1	0	0
YKT6	NEO	TM	-2.25	0.93	7.2	1	0	0
PSMA6	NEO	TM	-2.25	0.93	7.2	1	0	0
TRIM36	NEO	TM	-2.24	0.48	7.2	1	0	0
ZNF24	NEO	TM	-2.24	0.93	7.2	1	0	0
CDC42BPG	NEO	TM	-2.24	0.55	7.2	1	0	0
NDC80	NEO	TM	-2.24	0.4	7.2	1	0	0
SLC39A3	NEO	TM	-2.24	0.88	7.2	1	0	0
RRNAD1	NEO	TM	-2.24	0.74	7.2	1	0	0
TP53TG1	NEO	TM	-2.24	0.68	7.2	1	0	0
SLC39A4	NEO	TM	-2.24	0.82	7.2	1	0	0
HIST1H2AE	NEO	TM	-2.24	0.8	7.2	1	0	0
MIS18A	NEO	TM	-2.23	0.87	7.2	1	0	0
MAPK13	NEO	TM	-2.23	0.9	7.2	1	0	0
C18orf21	NEO	TM	-2.23	0.89	7.2	1	0	0
GNG4	NEO	TM	-2.23	0.22	7.2	1	0	0
TYW1	NEO	TM	-2.23	0.9	7.2	1	0	0
PSMA5	NEO	TM	-2.23	0.91	7.2	1	0	0
COG7	NEO	TM	-2.23	0.78	7.2	1	0	0
CCND1	NEO	TM	-2.23	0.83	7.2	1	0	0
CSTF2	NEO	TM	-2.23	0.88	7.2	1	0	0
CDCP1	NEO	TM	-2.23	0.64	7.2	1	0	0
ARHGEF39	NEO	TM	-2.22	0.15	7.2	1	0	0
CETN2	NEO	TM	-2.22	0.9	7.2	1	0	0
SPATS2	NEO	TM	-2.22	0.9	7.2	1	0	0
ATE1	NEO	TM	-2.22	0.83	7.2	1	0	0
UTP18	NEO	TM	-2.22	0.88	7.2	1	0	0
PFDN4	NEO	TM	-2.22	0.88	7.2	1	0	0
DBNDD1	NEO	TM	-2.22	0.57	7.2	1	0	0
CERS6	NEO	TM	-2.22	0.92	7.2	1	0	0
DDX11	NEO	TM	-2.22	0.71	7.2	1	0	0
ANKRD18A	NEO	TM	-2.22	0.07	7.2	1	0	0
MRGBP	NEO	TM	-2.22	0.91	7.2	1	0	0
NOL3	NEO	TM	-2.22	0.48	7.2	1	0	0
UBAC2	NEO	TM	-2.22	0.93	7.2	1	0	0
SHB	NEO	TM	-2.22	0.78	7.2	1	0	0
WDR74	NEO	TM	-2.21	0.87	7.2	1	0	0
H3F3A	NEO	TM	-2.21	0.94	7.2	1	0	0
HIST1H2BL	NEO	TM	-2.21	0.1	7.2	1	0	0
GLOD4	NEO	TM	-2.21	0.93	7.2	1	0	0
MMP13	NEO	TM	-2.21	0.59	7.2	1	0	0
WDSUB1	NEO	TM	-2.21	0.88	7.2	1	0	0
RHOV	NEO	TM	-2.21	0.56	7.2	1	0	0
RNMT	NEO	TM	-2.21	0.87	7.2	1	0	0
DCUN1D1	NEO	TM	-2.21	0.95	7.2	1	0	0
ZMAT5	NEO	TM	-2.21	0.83	7.2	1	0	0
HAUS6	NEO	TM	-2.21	0.56	7.2	1	0	0
RAD51AP1	NEO	TM	-2.21	0.65	7.2	1	0	0
ARID2	NEO	TM	-2.2	0.94	7.2	1	0	0
HAT1	NEO	TM	-2.2	0.93	7.2	1	0	0
GLYR1	NEO	TM	-2.2	0.92	7.2	1	0	0
PSMG3	NEO	TM	-2.2	0.88	7.2	1	0	0
TMPRSS3	NEO	TM	-2.2	0.45	7.2	1	0	0
THUMPD3	NEO	TM	-2.2	0.9	7.2	1	0	0
SNORA57	NEO	TM	-2.2	0.84	7.2	1	0	0
CBWD2	NEO	TM	-2.2	0.92	7.2	1	0	0
PPP4C	NEO	TM	-2.2	0.91	7.2	1	0	0
SNORA31	NEO	TM	-2.2	0.9	7.2	1	0	0
GPN1	NEO	TM	-2.2	0.91	7.2	1	0	0
ELMOD2	NEO	TM	-2.19	0.9	7.2	1	0	0
COX8A	NEO	TM	-2.19	0.9	7.2	1	0	0
PLK1	NEO	TM	-2.19	0.44	7.2	1	0	0
GOT2	NEO	TM	-2.19	0.89	7.2	1	0	0
NOP2	NEO	TM	-2.19	0.89	7.2	1	0	0
CRADD	NEO	TM	-2.19	0.87	7.2	1	0	0
ZNRD1	NEO	TM	-2.19	0.89	7.2	1	0	0
ZNF732	NEO	TM	-2.19	0.34	7.2	1	0	0
SUDS3	NEO	TM	-2.18	0.89	7.2	1	0	0
LRRC46	NEO	TM	-2.18	0.04	7.2	1	0	0
NDUFAF6	NEO	TM	-2.18	0.85	7.2	1	0	0
SLC20A2	NEO	TM	-2.18	0.8	7.2	1	0	0
MAP3K7	NEO	TM	-2.18	0.83	7.2	1	0	0
ZNF92	NEO	TM	-2.18	0.86	7.2	1	0	0
MRPL49	NEO	TM	-2.18	0.9	7.2	1	0	0
TFAM	NEO	TM	-2.18	0.92	7.2	1	0	0
PIGX	NEO	TM	-2.18	0.87	7.2	1	0	0
KIF22	NEO	TM	-2.17	0.62	7.2	1	0	0
DEPDC1B	NEO	TM	-2.17	0.28	7.2	1	0	0
RANBP1	NEO	TM	-2.17	0.9	7.2	1	0	0
DPP3	NEO	TM	-2.17	0.82	7.2	1	0	0
ACTR5	NEO	TM	-2.17	0.84	7.2	1	0	0
SKA1	NEO	TM	-2.17	0.07	7.2	1	0	0
FANCA	NEO	TM	-2.17	0.05	7.2	1	0	0
TFB2M	NEO	TM	-2.17	0.88	7.2	1	0	0
UMPS	NEO	TM	-2.17	0.93	7.2	1	0	0
PNO1	NEO	TM	-2.17	0.89	7.2	1	0	0
SORD	NEO	TM	-2.17	0.76	7.2	1	0	0
CFB	NEO	TM	-2.17	0.78	7.2	1	0	0
PABPC1L	NEO	TM	-2.17	0.82	7.2	1	0	0
VDAC3	NEO	TM	-2.17	0.91	7.2	1	0	0
CLSPN	NEO	TM	-2.16	0.43	7.2	1	0	0
LMAN2L	NEO	TM	-2.16	0.87	7.2	1	0	0
C7orf49	NEO	TM	-2.16	0.88	7.2	1	0	0
MKI67	NEO	TM	-2.16	0.58	7.2	1	0	0
ZC3H7A	NEO	TM	-2.16	0.93	7.2	1	0	0
RPP21	NEO	TM	-2.16	0.89	7.2	1	0	0
GALNT1	NEO	TM	-2.16	0.93	7.2	1	0	0
RAMP1	NEO	TM	-2.16	0.62	7.2	1	0	0
BLZF1	NEO	TM	-2.16	0.92	7.2	1	0	0
MRPL44	NEO	TM	-2.16	0.95	7.2	1	0	0
COA4	NEO	TM	-2.16	0.87	7.2	1	0	0
SNORA5C	NEO	TM	-2.15	0.91	7.2	1	0	0
HERC6	NEO	TM	-2.15	0.81	7.2	1	0	0
VDAC1	NEO	TM	-2.15	0.93	7.2	1	0	0
CDK2	NEO	TM	-2.15	0.93	7.2	1	0	0
SNORA34	NEO	TM	-2.15	0.9	7.2	1	0	0
TPK7	NEO	TM	-2.15	0.8	7.2	1	0	0
TLR5	NEO	TM	-2.15	0.79	7.2	1	0	0
ZNF695	NEO	TM	-2.15	0.28	7.2	1	0	0
ZNF143	NEO	TM	-2.15	0.89	7.2	1	0	0
CALR	NEO	TM	-2.15	0.95	7.2	1	0	0
MNF1	NEO	TM	-2.14	0.91	7.2	1	0	0
TRAP1	NEO	TM	-2.14	0.91	7.2	1	0	0
HNRNPA2B1	NEO	TM	-2.14	0.95	7.2	1	0	0
GINS4	NEO	TM	-2.14	0.36	7.2	1	0	0
KLRG2	NEO	TM	-2.14	0.07	7.2	1	0	0
LOC92249	NEO	TM	-2.14	0.82	7.2	1	0	0
PEX13	NEO	TM	-2.14	0.93	7.2	1	0	0
CCL11	NEO	TM	-2.14	0.25	7.2	1	0	0
FBXL16	NEO	TM	-2.14	0.19	7.2	1	0	0
RFXANK	NEO	TM	-2.14	0.94	7.2	1	0	0
C21orf58	NEO	TM	-2.14	0.17	7.2	1	0	0
OPA1	NEO	TM	-2.14	0.88	7.2	1	0	0
SYNE4	NEO	TM	-2.14	0.26	7.2	1	0	0
RPL34	NEO	TM	-2.14	0.82	7.2	1	0	0
PUS7L	NEO	TM	-2.13	0.89	7.2	1	0	0
HSPA2	NEO	TM	-2.13	0.76	7.2	1	0	0
WNT5A	NEO	TM	-2.13	0.65	7.2	1	0	0
SERPINB8	NEO	TM	-2.13	0.76	7.2	1	0	0
UBN2	NEO	TM	-2.13	0.9	7.2	1	0	0
MST4	NEO	TM	-2.13	0.81	7.2	1	0	0
ARF5	NEO	TM	-2.13	0.96	7.2	1	0	0
EPN3	NEO	TM	-2.13	0.31	7.2	1	0	0
CACNB3	NEO	TM	-2.13	0.79	7.2	1	0	0
MAD2L1	NEO	TM	-2.12	0.77	7.2	1	0	0
RAB3IP	NEO	TM	-2.12	0.84	7.2	1	0	0
UBN1	NEO	TM	-2.12	0.89	7.2	1	0	0
SPAG5	NEO	TM	-2.12	0.69	7.2	1	0	0
PAAF1	NEO	TM	-2.12	0.88	7.2	1	0	0
RAN	NEO	TM	-2.12	0.92	7.2	1	0	0
NLRP2	NEO	TM	-2.12	0.35	7.2	1	0	0
SPIRE2	NEO	TM	-2.12	0.44	7.2	1	0	0
YWHAZ	NEO	TM	-2.12	0.83	7.2	1	0	0
POLR2H	NEO	TM	-2.12	0.92	7.2	1	0	0
IP6K2	NEO	TM	-2.12	0.9	7.2	1	0	0
CYCS	NEO	TM	-2.11	0.91	8.72	1	0	0
RRN3	NEO	TM	-2.11	0.92	8.72	1	0	0
UCKL1	NEO	TM	-2.11	0.92	8.72	1	0	0
RERE	NEO	TM	-2.11	0.88	8.72	1	0	0
C1orf53	NEO	TM	-2.11	0.43	8.72	1	0	0
MCM2	NEO	TM	-2.11	0.48	8.72	1	0	0
CEP55	NEO	TM	-2.11	0.6	8.72	1	0	0
NUDT5	NEO	TM	-2.11	0.94	8.72	1	0	0
BCCIP	NEO	TM	-2.11	0.94	8.72	1	0	0
EPRS	NEO	TM	-2.11	0.95	8.72	1	0	0
DLGAP5	NEO	TM	-2.11	0.64	8.72	1	0	0
SARNP	NEO	TM	-2.11	0.88	8.72	1	0	0
C22orf28	NEO	TM	-2.11	0.96	8.72	1	0	0
ALDH3B2	NEO	TM	-2.11	0.57	8.72	1	0	0
HGS	NEO	TM	-2.11	0.88	8.72	1	0	0
KIAA0556	NEO	TM	-2.1	0.88	8.72	1	0	0
KIF3A	NEO	TM	-2.1	0.84	8.72	1	0	0
GPR56	NEO	TM	-2.1	0.8	8.72	1	0	0
MKRN2	NEO	TM	1.79899	1.04126	9.2281	1	0	0
RBMS1	NEO	TM	1.88289	1.05233	9.2281	1	0	0
NFE2L1	NEO	TM	1.87635	1.05723	9.2281	1	0	0
RNF13	NEO	TM	1.81623	1.03697	9.2281	1	0	0
COL6A3	NEO	TM	1.86622	1.14722	9.2281	1	0	0
IQCA1	NEO	TM	1.80958	1.40274	9.2281	1	0	0
ARL15	NEO	TM	1.83166	1.09146	9.2281	1	0	0
EGFL6	NEO	TM	1.86382	1.22714	9.2281	1	0	0
ERAP1	NEO	TM	1.85876	1.05896	9.2281	1	0	0
SLC18B1	NEO	TM	1.98481	1.0925	6.91765	1	0	0
TCEA3	NEO	TM	1.88511	1.07894	6.91765	1	0	0
GPX1	NEO	TM	1.88546	1.03495	6.91765	1	0	0
S100A12	NEO	TM	1.88428	2.0619	6.91765	1	0	0
MKLN1	NEO	TM	1.90676	1.03751	6.91765	1	0	0
CASP4	NEO	TM	1.90776	1.05508	6.91765	1	0	0
LILRA2	NEO	TM	1.99518	1.48325	6.91765	1	0	0
BOC	NEO	TM	1.9964	1.35307	6.91765	1	0	0
PPM1M	NEO	TM	1.97786	1.16359	6.91765	1	0	0
NOVA1	NEO	TM	1.98209	1.50871	6.91765	1	0	0
FBXL12	NEO	TM	1.9571	1.05916	6.91765	1	0	0
PRKACB	NEO	TM	2.00569	1.10266	5.1677	1	0	0
CRIM1	NEO	TM	2.07417	1.09521	5.1677	1	0	0
ARHGAP15	NEO	TM	2.04694	1.12504	5.1677	1	0	0
PCDHB15	NEO	TM	2.05595	1.35684	5.1677	1	0	0
MAP1LC3A	NEO	TM	2.0199	1.10856	5.1677	1	0	0
MPHOSPH8	NEO	TM	2.10825	1.05504	5.1677	1	0	0
HLA-E	NEO	TM	2.16186	1.06379	3.93741	1	1	0
FERMT2	NEO	TM	2.23116	1.09528	3.93741	1	1	0
FAM114A2	NEO	TM	2.14868	1.09608	3.93741	1	1	0
SLC43A1	NEO	TM	2.21653	1.18724	3.93741	1	1	0
MEOX1	NEO	TM	2.18596	1.51056	3.93741	1	1	0
ADM5	NEO	TM	2.12493	2.00507	3.93741	1	1	0
DUSP6	NEO	TM	1.20302	1.04631	26.6495	1	0	0
RAP1A	NEO	TM	1.22026	1.02732	23.3702	1	0	0
IER5	NEO	TM	1.24356	1.04016	23.3702	1	0	0
FAM3C	NEO	TM	1.30852	1.02961	23.3702	1	0	0
HP	NEO	TM	1.22318	1.64478	23.3702	1	0	0
TAF7	NEO	TM	1.24033	1.03008	23.3702	1	0	0
GRAP2	NEO	TM	1.26211	1.12883	23.3702	1	0	0
TECPR2	NEO	TM	1.22309	1.07865	23.3702	1	0	0
ALKBH3	NEO	TM	1.31321	1.06309	23.3702	1	0	0
SLA	NEO	TM	1.30871	1.1039	23.3702	1	0	0
C10orf32	NEO	TM	1.29562	1.04913	23.3702	1	0	0
SRGAP1	NEO	TM	2.31649	1.11787	2.75104	1	1	0
KPNA5	NEO	TM	2.29875	1.08844	2.75104	1	1	0
TTC7B	NEO	TM	2.28291	1.14517	2.75104	1	1	0
SYT11	NEO	TM	2.30135	1.10606	2.75104	1	1	0
SH3PXD2A	NEO	TM	2.34694	1.14054	2.75104	1	1	0
ALKBH8	NEO	TM	2.24548	1.10159	2.75104	1	1	0
ZRANB1	NEO	TM	2.34721	1.04909	2.75104	1	1	0
GTDC1	NEO	TM	1.3251	1.05798	19.861	1	0	0
C7orf60	NEO	TM	1.3795	1.06308	19.861	1	0	0
BET1L	NEO	TM	1.41233	1.04629	19.861	1	0	0
ITGAV	NEO	TM	1.42822	1.03668	19.861	1	0	0
PIGK	NEO	TM	1.42385	1.04699	19.861	1	0	0
DCTN4	NEO	TM	1.43933	1.03199	16.6955	1	0	0
NGRN	NEO	TM	1.43891	1.02769	16.6955	1	0	0
KLHL28	NEO	TM	1.46202	1.05262	16.6955	1	0	0
EPHX2	NEO	TM	1.5197	1.13567	16.6955	1	0	0
PPFIBP1	NEO	TM	1.46948	1.05976	16.6955	1	0	0
PLCB2	NEO	TM	1.5327	1.1017	16.6955	1	0	0
UBR2	NEO	TM	1.51493	1.03151	16.6955	1	0	0
EIF4G3	NEO	TM	1.6048	1.04147	13.8796	1	0	0
YIPF5	NEO	TM	1.65003	1.02915	13.8796	1	0	0
NDNL2	NEO	TM	1.64951	1.04903	13.8796	1	0	0
ADAMTS6	NEO	TM	1.54242	1.12343	13.8796	1	0	0
LGI2	NEO	TM	1.63796	1.28181	13.8796	1	0	0
ZNF197	NEO	TM	1.58743	1.04768	13.8796	1	0	0
INO80D	NEO	TM	1.617	1.05376	13.8796	1	0	0
TUT1	NEO	TM	1.55007	1.08343	13.8796	1	0	0
PRUNE2	NEO	TM	1.65626	1.74757	11.3739	1	0	0
SNRK	NEO	TM	1.72713	1.04847	11.3739	1	0	0
MBP	NEO	TM	1.71239	1.10884	11.3739	1	0	0
FAM208A	NEO	TM	1.76568	1.0426	11.3739	1	0	0
TRAM2	NEO	TM	1.7167	1.06383	11.3739	1	0	0
NXPH3	NEO	TM	1.7648	1.52329	11.3739	1	0	0
PIK3CA	NEO	TM	1.67242	1.04105	11.3739	1	0	0
ANKRD42	NEO	TM	1.68452	1.11332	11.3739	1	0	0
MTMR9	NEO	TM	1.75905	1.04607	11.3739	1	0	0
PRKG2	NEO	TM	1.69642	1.5634	11.3739	1	0	0
CALM3	NEO	TM	1.68014	1.02876	11.3739	1	0	0
CRYAB	NEO	TM	2.45342	1.22599	1.96274	1	1	0
CDC42EP5	NEO	TM	2.41746	1.23787	1.96274	1	1	0
LAMA4	NEO	TM	2.44438	1.12094	1.96274	1	1	0
TMEM117	NEO	TM	2.39219	1.11622	1.96274	1	1	0
CALD1	NEO	TM	2.41138	1.08368	1.96274	1	1	0
STAB2	NEO	TM	2.42272	2.43312	1.96274	1	1	0
NR1D2	NEO	TM	2.39907	1.0849	1.96274	1	1	0
PTGFR	NEO	TM	2.56574	1.50893	1.32244	1	1	0
ZNF727	NEO	TM	2.54917	1.26317	1.32244	1	1	0
MSRB3	NEO	TM	2.53735	1.19965	1.32244	1	1	0
SEC16B	NEO	TM	2.58647	1.28068	1.32244	1	1	0
FBXO42	NEO	TM	2.55303	1.05799	1.32244	1	1	0
ZNF841	NEO	TM	2.77485	1.07489	0.859191	1	1	0
ZNF471	NEO	TM	2.77909	1.27779	0.859191	1	1	0
ZNF441	NEO	TM	2.83939	1.15264	0.595578	1	1	0
PGM5P2	NEO	TM	2.78637	1.87848	0.595578	1	1	0
KIRREL	NEO	TM	2.90635	1.20954	0.595578	1	1	0
MGEA5	NEO	TM	2.89449	1.05077	0.595578	1	1	0
MCTP1	NEO	TM	2.95243	1.20359	0.40242	1	1	0
ZNF835	NEO	TM	2.94899	1.4811	0.40242	1	1	0
FHOD3	NEO	TM	2.99355	1.35998	0.40242	1	1	0
CD302	NEO	TM	3.03791	1.16833	0.40242	1	1	0
HOXC9	NEO	TM	2.96521	1.27696	0.40242	1	1	0
TENM3	NEO	TM	3.21727	1.36213	0.266968	1	1	0
PRDM6	NEO	TM	3.09852	1.67537	0.266968	1	1	0
TNFSF12	NEO	TM	3.1159	1.12432	0.266968	1	1	0
S100B	NEO	TM	3.20629	1.50195	0.266968	1	1	0
KCTD12	NEO	TM	3.17593	1.14547	0.266968	1	1	0
SYT15	NEO	TM	3.1825	1.83506	0.266968	1	1	0
[truncated: 1,685 more rows]
